# Supplementary material for: The miR-200c/141-ZEB2-TGFb axis is aberrant in human T-cell prolymphocytic leukemia
Source: PubMed Central journal article supplement — Haematologica. 2021 Feb 18;107(1):143–53. doi: 10.3324/haematol.2020.263756 (PMC8719092; doi:10.3324/haematol.2020.263756), 2021-02-18
Supplement: 2020_263756_ERKELAND_SUPPL.pdf [file 2020_263756_ERKELAND_SUPPL.pdf]

## The miR-200c/141-ZEB2-TGF $\beta$ axis is aberrant in human T-cell prolymphocytic leukemia

Stefan J. Erkeland,<sup>1</sup> Christiaan J. Stavast,<sup>1</sup> Joyce Schilperoord-Vermeulen,<sup>1</sup> Giada Dal Collo,<sup>1</sup> Harmen J.G. van de Werken,<sup>1,2</sup> Leticia G. Leon,<sup>1</sup> Antoinette van Hoven-Beijen,<sup>1</sup> Iris van Zuijlen,<sup>1</sup> Yvonne M. Mueller,<sup>1</sup> Eric M. Bindels,<sup>3</sup> Dick de Ridder,<sup>4</sup> Mies C. Kappers-Klunne,<sup>3</sup> Kirsten van Lom,<sup>3</sup> Vincent H.J. van der Velden<sup>1</sup> and Anton W. Langerak<sup>1</sup>

<sup>1</sup>Department of Immunology, Erasmus MC, University Medical Center, Rotterdam; <sup>2</sup>Cancer Computational Biology Center, Cancer Institute, Erasmus MC, University Medical Center, Rotterdam; <sup>3</sup>Department of Hematology, Erasmus MC, University Medical Center, Rotterdam and <sup>4</sup>Bioinformatics Group, Wageningen University, Wageningen, the Netherlands

©2022 Ferrata Storti Foundation. This is an open-access paper. doi:10.3324/haematol.2020.263756

Received: June 18, 2020.

Accepted: January 22, 2021.

Pre-published: February 18, 2021.

Correspondence: *STEFAN J. ERKELAND* - s.erkeland@erasmusmc.nl

*ANTON W. LANGERAK* - a.langerak@erasmusmc.nl

---

## **Supplementary Methods**

### **Immunophenotyping and cytomorphologic analysis**

Fresh peripheral blood and BM or cryopreserved PBMC of T-PLL patients and healthy donors were stained using the 8-color EuroFlow T cell Chronic Lympho-Proliferative Disease (T-CLPD) panel (1). Acquisition was performed on a FACSCanto II flowcytometer (BD Biosciences) and the data was analyzed with Infinicyt software (Cytognos), as previously described (1). All six files were merged. Using the backbone markers, T-PLL cells were discriminated from normal T cells. Calculations were performed on T-PLL cells only. The T-PLL phenotype was compared to the phenotype of 6 normal T cell developmental stages (CD4+ and CD8+ naïve, memory and effector T cells) from healthy individuals and visualized as multidimensional principal component plots (so-called Automated Population Separator (APS) views). TGF $\beta$ R1, TGF $\beta$ R2 and TGF $\beta$ R3 expression on human PBMCs and T-PLL cells was evaluated using ab235178 (Abcam) and PE-conjugated Goat F(ab')<sub>2</sub> anti-rabbit (4052-09, Southern Biotech), APC-conjugated FAB241A-100 (R&D Systems) and PE-conjugated FAB242P (R&D Systems) antibodies, respectively. For morphological analysis, blood smears were stained with May-Grünwald-Giemsa as described (2).

### **Fluorescence *in situ* hybridization analysis and cytogenetics**

DNA fluorescence *in situ* hybridization was performed according to the manufacturer's instructions on fresh or thawed mononuclear cells using probes specific for 11q22/ATM, 17p13.1/*TP53* or 14q32 (Vysis LSI p53 / LSI ATM / TCL1, Abbott Laboratories). For karyotyping, bone marrow or peripheral blood specimens were examined for chromosomal abnormalities using standard G- or R-banding techniques. Results were described according to ISCN 2013 guidelines.

## **T cell receptor gene rearrangement analysis**

Genomic DNA (Sigma GenElute Mammalian DNA kit) and/or total RNA was isolated (total RNA kit, Sigma) from PBMC fractions of T-PLL samples. Identification of *TRB* gene rearrangements and complementarity determining region 3 (*CDR3*) regions was performed on genomic DNA according to the multiplex BIOMED-2 protocol (InVivoScribe (3)) followed by Sanger sequencing (ABI 3100 Genetic Analyzer) and analyzed using CLC Main Workbench (Qiagen). The acquired nucleotide sequences were aligned to a current database (IMGT/V-Quest) to assign TRBV, TRBD, and TRBJ genes and reading frames of the gene rearrangements. cDNA synthesis was performed using 10x CA buffer (0.2 M Tris pH8.3, 0.5M KCl), 25 mM MgCl<sub>2</sub> (Applied Biosystems Life Technologies), 100 mM dithiothreitol (Invitrogen Life Technologies), 100 μM random primers (Invitrogen), 10 U/μL recombinant RNAsin (Promega), 200 U/μL reverse transcriptase Superscript II (Invitrogen Life Technologies) and 20mM dNTP (GE Healthcare). cDNA was then amplified using a constant region reverse *Cα* primer and 54 different *Vα* family-specific forward primers, divided over five different multiplex tubes as previously described (4). The acquired nucleotide sequences were aligned to the IMGT/V-Quest database to assign TRAV and TRAJ genes and reading frames of the gene rearrangements. Circoletto software (<http://circos.ca>) was used to analyze the data and to identify any skewing of the TCR rearrangements within the T-PLL patient cohort.

## **Lentiviral miRNA expression vectors and transduction of Jurkat and HeLa cells**

The MIR200C/141 cluster was first amplified with primers miR-200c/141\_FW4: 5'-CCGTGGAATCTGGGGCCTTAAAGC-3' and miR-200c/141\_RV3: 5'-TCTTCCTCATGTTCCCCTTC-3'. Next, a nested PCR was performed with primers miR-200c/141\_FW2: 5'-TGGGTAAATCGGTGTGTGTC-3' and miR-200c/141\_RV2: 5'-

CGGGAAGACAATGGAGGTG-3'. To link the SV40 promoter to the miR-200c/141 sequence, a 30 nucleotide overhang was generated, using pBSV40-miR-200C/141\_FW: 5'-GGCTTTTGC AAAAAGCTTACCATGACCGAGTGGGTAAATCGGTGTGTGTC-3' and miR-200c/141\_RV2. Adding AgeI and NheI restriction sites to the insert was done with primers MSCV-SV40-NheI-FW: 5'-GCTAGCTGTGGAATGTGTGTCAGTTAG-3' and miR-200c/141\_AgeI\_RV2: 5'-ACCGGTACAACAGTAGGAAGGTGAG-3'. The fragment was cloned in pJET1.2/blunt and analyzed by Sanger sequencing. This vector was digested with NheI-HF and AgeI-HF (NEB) and the insert was gel purified and ligated into the NheI-AgeI sites of pLX301 (Addgene plasmid #25895) (5), resulting in pLX301-miR-200c/141. Lentiviral particles were generated as described (5). Jurkat cells were plated in a 24-well plate in RPMI, FCS (10%), P/S and HeLa cells were plated in 6-wells plates in DMEM supplemented with FCS (10%) and P/S. The pLX301 viruses were added to the medium with Polybrene (8 µg/mL) (Sigma-Aldrich, Cat #H9268). Cells were spun at 800xg for 2 hours at 37 °C. Transduced cells were selected on Puromycin (1 µg/mL).

### **Gene expression profiling**

Gene expression analysis was performed on peripheral blood/bone marrow mononuclear cells of 23 T-PLL cases and 6 normal T-cell subsets (naïve, memory and effector of CD4+ and CD8+ cells) of 3 healthy donors. When the tumor load of a patient was below 85%, cells were purified using cell sorting on a FACSAria III (BD Biosciences) based on the CD4 and CD8 expression on T-PLL cells. RNA was isolated from mononuclear cells using the Qiagen RNeasy mini kit and RNA integrity was checked according to the Agilent RNA 6000 Nano Assay Protocol. RNA was reverse transcribed into cDNA, purified, fragmented and biotinylated as described previously (6). All cDNA was hybridized to Affymetrix HG-U133 Plus 2.0 GeneChip arrays (containing 54,675 probe sets) according to the Affymetrix GeneChip 3' IVT Express Kit user

manual (Affymetrix). Quality of the data was checked with the R package “affyQCReport”. In short, probe intensity background was removed using robust multichip analysis (7). The intensity levels were quantile normalized (8). Array groups (two biologically independent arrays per group) that corresponded to the development stages were compared based on the perfect match probe intensity levels only (7), by performing a per-probe set two-way analysis of variance (ANOVA, with factors “probe” and “stage”)(9). The p-values were adjusted for multiple testing using Šidák step-down adjustment (<https://statistics.berkeley.edu/tech-reports/633>) and all differences with adjusted p-values <0.05 were considered to be significant.

### **RNA sequencing**

T-PLL cells were lysed in TRIzol (Invitrogen) and total RNA was isolated according to manufacturer’s protocol. Quality and concentration of total RNA of the samples was determined with the RNA 6000 Nano assay on an Agilent 2100 Bioanalyzer (Agilent Technologies). Only samples with RNA integrity number (RIN) > 7 were used for analyses. The small non-coding RNA cDNA libraries were generated with 100 ng total RNA using CleanTag Small RNA Library Preparation Kit (Trilink Biotechnologies) according to the manufacturer’s protocol. For genome wide gene expression profiling, cDNA libraries were generated with 1 ng total RNA using the Smart-Seq V4 Ultra low input RNA kit (Takara-bio) in combination with the Truseq nano DNA library prep kit (Illumina). Quality and concentration of cDNA libraries were determined with the Agilent High Sensitivity DNA Kit on an Agilent 2100 Bioanalyzer. All cDNA libraries were run on the Illumina HiSeq2500 or Illumina MiSeq sequencing platform according to manufacturer’s protocols.

## **mRNA and miRNAs data analyses**

After sequencing and de-multiplexing the quality of the data was assessed with fastQC (v 0.11.8). When the RNA sequence data passed the quality check, fastq files were aligned using STAR aligner (v.2.5.3e) with GRCh38 as reference. The small non-coding RNA reads were trimmed and aligned with Noalign, using novoalign indexes. Read counts were obtained using FeatureCounts (v1.6.0) and Homo\_sapiens GRCh38.92 as reference for the RNA sequencing data and miRBase.annotation20 for miRNA sequence data. The quality of the alignment and assigned reads were determined with MultiQC. Noise reduction was applied to the count data by removing the very low read counts (RNA sequence data) and increasing the miRNA counts by 50. The rlog transformation from the DESeq2 R package (v1.22.2) was used for data processing, clustering, heatmap and PCA plots. This command transforms the raw count data to the  $\log_2$  scale in a way which minimizes differences between samples for rows with small counts, and which normalizes with respect to library size (10). DESeq2 was used for normalization of the data (median of ratios) and to determine differentially expressed genes (10, 11). Differentially expressed genes were statistically analyzed by the Wald test with Benjamin-Hochberg's correction for multiple testing. For miRNA target analyses we extracted lists of predicted targets from TargetScan ([www.targetscan.org](http://www.targetscan.org)) (Supplementary Table 2-4). The significantly differentiated genes were used for enrichment analyses (GSEA, GSEA Desktop Application (v2.2.1). Kaplan-Meier plots were generated using IBM SPSS Statistics version 25 and the statistical difference in survival was calculated using the Mantel-Cox Log Rank test. A multiple regression analysis was run to determine confounding factors for survival, including age, gender, white blood cell count and immunophenotype.

### **Quantitative PCR of miRNAs and mRNAs**

Single small RNA qPCRs for U6, miR-141-3p, miR-200c-3p, miR-181a-5p and miR-181b-5p were performed with Taqman single real-time assays with kit ID 001973, ID 000463, ID 002300, ID 000480, ID 001098 (Applied Biosystems) respectively, according to the manufacturer's protocol. For total cDNA preparation, the High-Capacity reverse transcription kit (Thermo Fisher Scientific) was used. GAPDH, ZEB2, TGF $\beta$ 1, TGF $\beta$ R3 mRNA was determined with Taqman gene expression assays Hs02786624\_g1, Hs00207691\_m1, Hs00998133\_m1 and Hs00234257\_m1 (Thermo Fisher Scientific) respectively, according to manufacturer's protocol. Relative expression was calculated with the  $\Delta\Delta$ Ct calculation method using GAPDH as loading control.

### **Western blotting**

HeLa cells transduced with either EV or miR200c/141, or T-PLL and PBMC samples were incubated in complete medium either in the presence or absence of 10 ng/mL huTGF- $\beta$ 1 (Peprotech) for 1h at 37°C. After incubation, cells were cooled on ice and washed three times in phosphate-buffered saline (PBS). Cells were lysed in NP-40 lysis buffer supplemented with phosphatase and protease inhibitors on ice. Protein-extract concentrations were measured using BCA protein assay kit according to manufactures protocols (Thermo Scientific). Equal amount of protein was loaded on Mini-Proaten TGX precast gels (Bio-Rad). Blots were labeled with either anti-phospho-(Ser465/467)-SMAD2 (138D4, Cell Signaling, dilution 1:1000), anti-SMAD2/3 (D7G7, Cell Signaling, dilution 1:1000), anti-phospho-(Ser423/Ser425)-SMAD3 (ab52903, Abcam, dilution 1:1000), anti-TGF $\beta$ RI (ab235178, Abcam, dilution 1:2000), and anti- $\beta$ -actin (Sigma, dilution 1:3000) at 4°C overnight. Next, the membranes were incubated with IRDye 680RD Goat anti-Rabbit IgG Secondary Antibody (Li-COR, dilution range 1:5000

– 1:10000) at room temperature for 1 hour. Images were taken with Odyssey Imaging System (Li-COR) and analyzed using ImageStudio Lite.



## References

1. van Dongen JJ, Lhermitte L, Bottcher S, et al. EuroFlow antibody panels for standardized n-dimensional flow cytometric immunophenotyping of normal, reactive and malignant leukocytes. *Leukemia*. 2012 Sep;26(9):1908-1975.
2. Alemdehy MF, de Looper HW, Kavelaars FG, et al. MicroRNA-155 induces AML in combination with the loss of C/EBPA in mice. *Leukemia*. 2016 Nov;30(11):2238-2241.
3. van Dongen JJ, Langerak AW, Bruggemann M, et al. Design and standardization of PCR primers and protocols for detection of clonal immunoglobulin and T-cell receptor gene recombinations in suspect lymphoproliferations: report of the BIOMED-2 Concerted Action BMH4-CT98-3936. *Leukemia*. 2003 Dec;17(12):2257-2317.
4. Villarese P, Lours C, Trinquand A, et al. TCRalpha rearrangements identify a subgroup of NKL-deregulated adult T-ALLs associated with favorable outcome. *Leukemia*. 2018 Jan;32(1):61-71.
5. Yang X, Boehm JS, Yang X, et al. A public genome-scale lentiviral expression library of human ORFs. *Nat Methods*. 2011 Jun 26;8(8):659-661.
6. Staal FJ, van der Burg M, Wessels LF, et al. DNA microarrays for comparison of gene expression profiles between diagnosis and relapse in precursor-B acute lymphoblastic leukemia: choice of technique and purification influence the identification of potential diagnostic markers. *Leukemia*. 2003 Jul;17(7):1324-1332.
7. Irizarry RA, Hobbs B, Collin F, et al. Exploration, normalization, and summaries of high density oligonucleotide array probe level data. *Biostatistics*. 2003 Apr;4(2):249-264.
8. Bolstad BM, Irizarry RA, Astrand M, Speed TP. A comparison of normalization methods for high density oligonucleotide array data based on variance and bias. *Bioinformatics*. 2003 Jan 22;19(2):185-193.
9. Dik WA, Pike-Overzet K, Weerkamp F, et al. New insights on human T cell development by quantitative T cell receptor gene rearrangement studies and gene expression profiling. *J Exp Med*. 2005 Jun 6;201(11):1715-1723.
10. Love MI, Huber W, Anders S. Moderated estimation of fold change and dispersion for RNA-seq data with DESeq2. *Genome Biol*. 2014;15(12):550.
11. Anders S, Huber W. Differential expression analysis for sequence count data. *Genome Biol*. 2010;11(10):R106.

# Supplementary Figure 1

A)

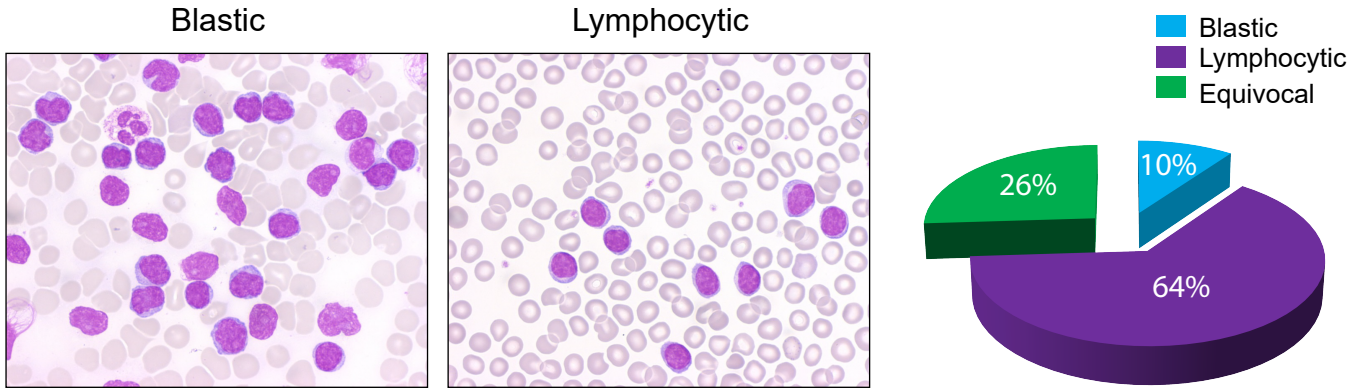

B)

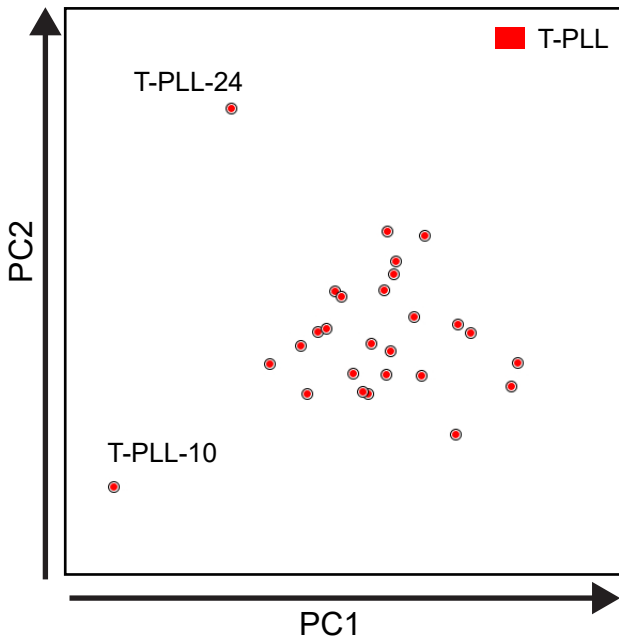

| PC1       |              | PC2       |              |
|-----------|--------------|-----------|--------------|
| parameter | contribution | parameter | contribution |
| CD8       | 14.91        | cyTCL1    | 13.21        |
| CD45RA    | 14.01        | CD28      | 11.87        |
| CD45RO    | 11.04        | CD26      | 7.17         |
| CD11c     | 8.34         | CD7       | 6.92         |
| CD94      | 7.64         | CD4       | 6.92         |

C)

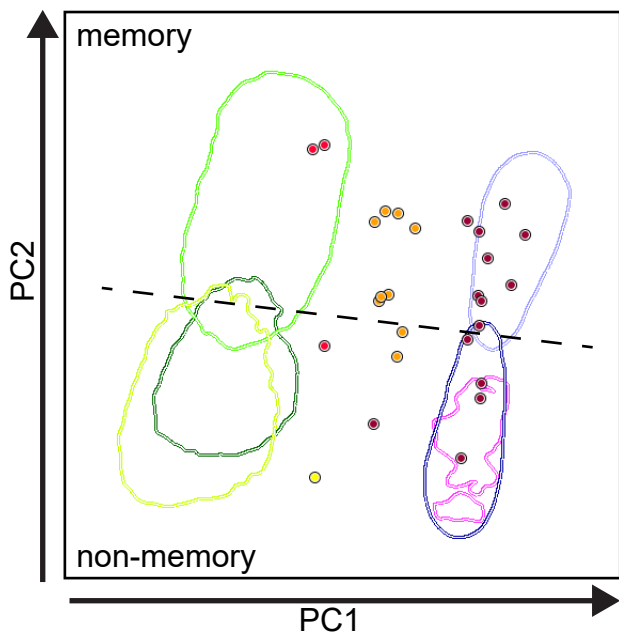

- T-PLL CD4+/CD8-
- T-PLL CD4-/CD8+
- T-PLL CD4+/CD8+
- T-PLL CD4-/CD8-
- CD4+ Naive
- CD4+ Memory
- CD4+ Effector
- CD8+ Naive
- CD8+ Memory
- CD8+ Effector

| PC1       |              | PC2       |              |
|-----------|--------------|-----------|--------------|
| parameter | contribution | parameter | contribution |
| CD8       | 21.99        | CD45RA    | 28.94        |
| CD4       | 21.26        | CD45RO    | 27.28        |
| CD45RA    | 8.15         | CD27      | 9.54         |
| CD26      | 7.18         | CD4       | 8.48         |
| CD57      | 6.25         | CD8       | 8.04         |

## Supplementary Figure 1

D)

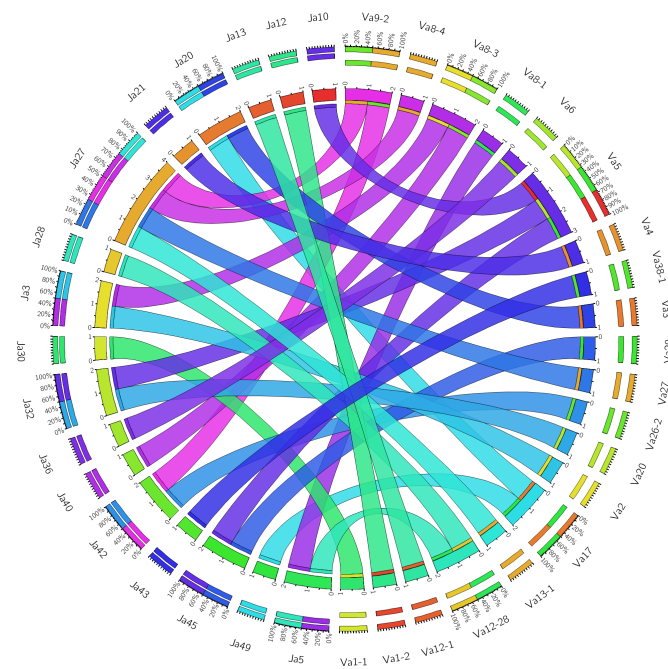

E)

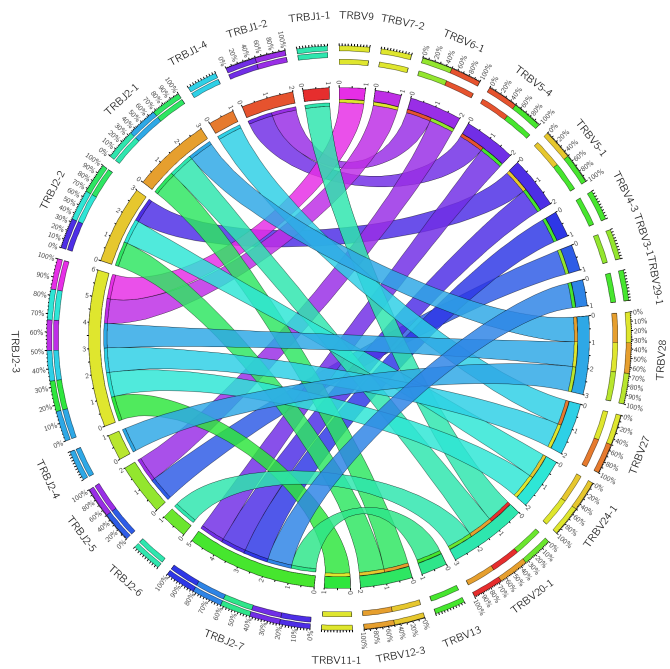

### Morphological and immuno-phenotypic characterization of T-PLL

**A)** Blood smears showing examples of blast-like and lymphocytic morphology of T-PLL cases. Pie chart shows the percentages of the different morphologies in our T-PLL cohort. **B)** Multidimensional APS analysis (Automated Population Separation; Infinicyt software) of T-PLL cases, based on all parameters of all tumor cells of each T-PLL case, resulting in clustering of most T-PLL cases, except for two outliers (T-PLL 10 and 24). Graphs highlight the markers in descending order and their relative contribution to separation in the first and second principal component (PC). **C)** APS plots of six different CD4+ or CD8+ normal T cell subsets were generated and then fixed. Contours lines represents 2x standard deviation (2 s.d.). Next, T-PLL cases were added to the APS analysis to evaluate their relatedness to normal T cell subsets. The majority of T-PLL cases appeared to cluster closer to the CD4+ and CD8+ memory T cell subsets above the dashed line, whereas some cases clustered more with the non-memory subsets. **D, E)** Circoletto plots showing diversity of V and J gene usage of TRA and TRB gene rearrangements in T-PLL samples.

Supplementary Figure 2

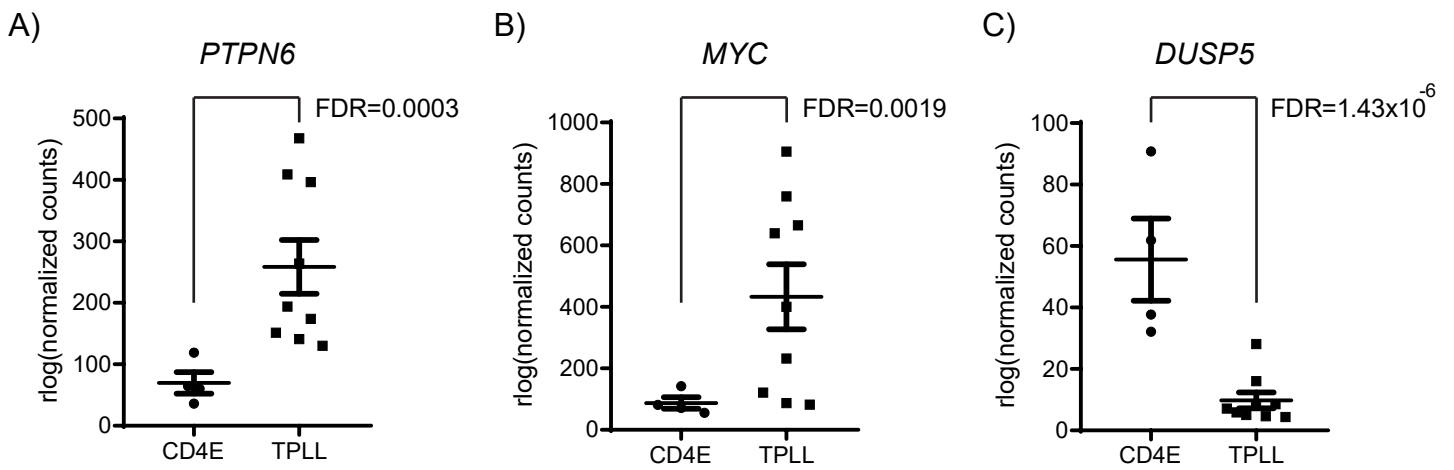

A,B,C) Expression of indicated genes in CD4+ effector cells (CD4E) and T-PLL. Differentially expressed genes were statistically analyzed by the Wald test with Benjamin-Hochberg's correction for multiple testing. The differences in expression is indicated by the FDR values.

# Supplementary Figure 3

**A)**

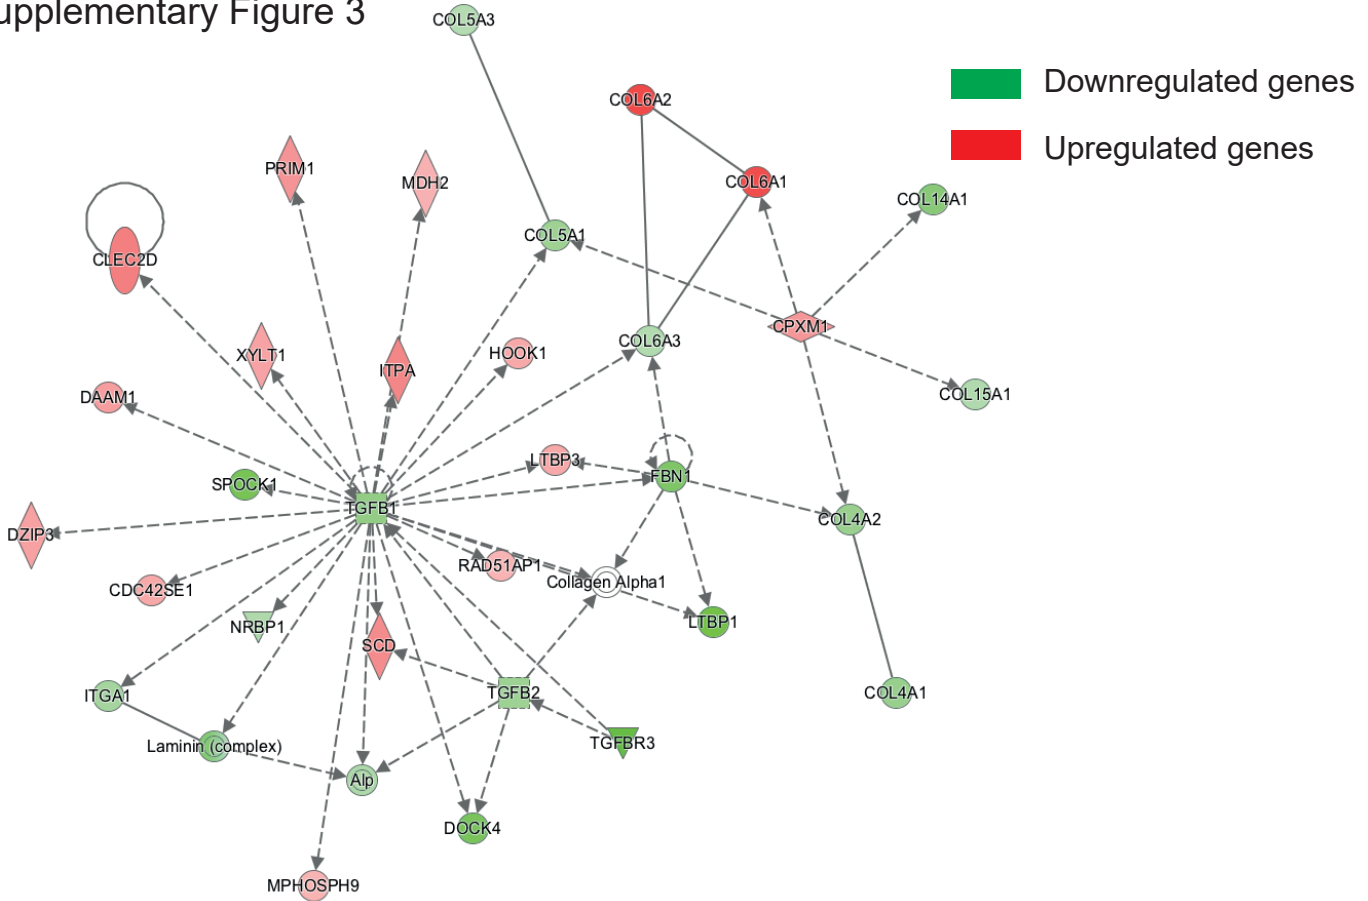

**B)**

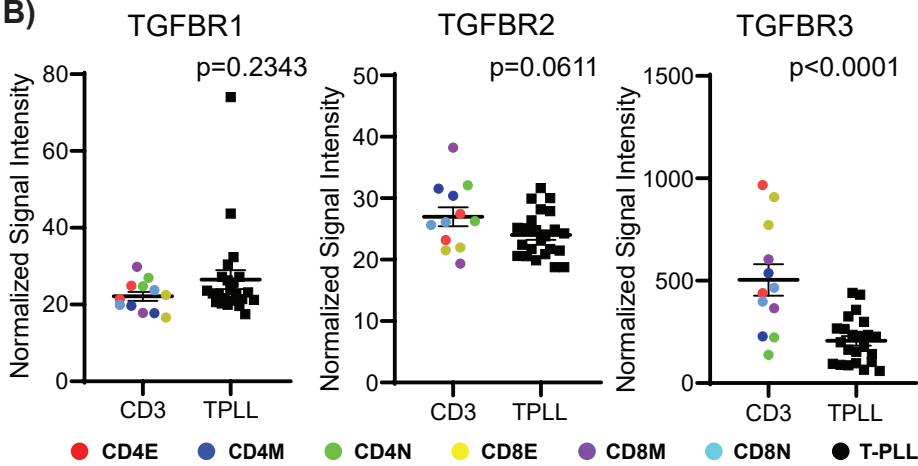

**C)**

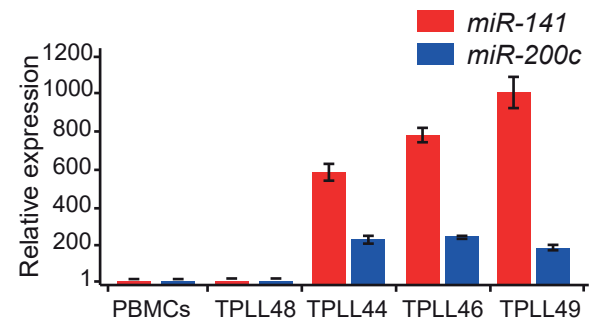

**D)**

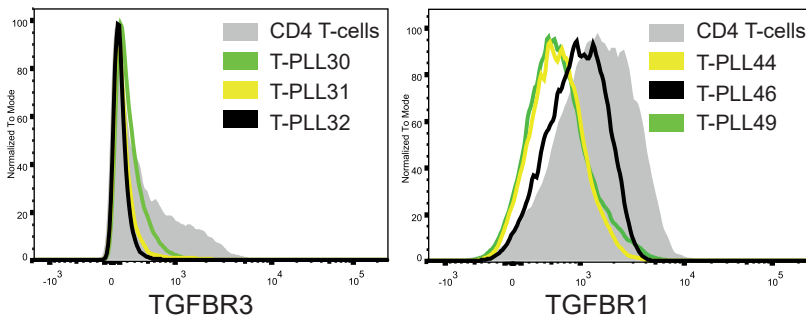

**E)**

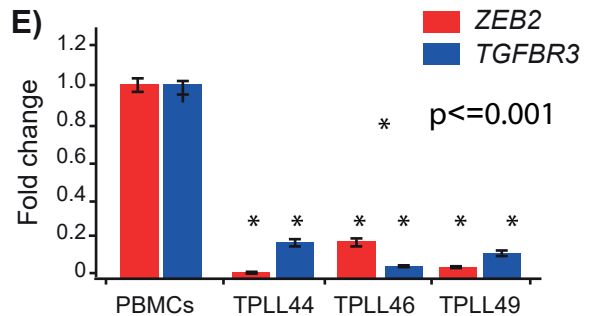

**TGFB pathway is aberrant in T-PLL. A)** Significantly deregulated genes in T-PLL were analyzed by Ingenuity Pathway Analysis. The affected genes in T-PLL and how they are connected in the TGFB network are depicted. **B)** Expression of TGFBRs in different T-cell subsets and T-PLL as determined by gene expression arrays is shown. P-values are calculated by a Mann Whitney test. **C)** Expression levels of miR-141 and miR-200c relative to U6 and PBMCs are plotted. **D)** FACS plots showing membrane expression of TGFBR3 and TGFBR1 in T-PLL compared to normal CD4 T-cells. **E)** The expression levels *ZEB2* and *TGFBR3* relative to *GAPDH* and PBMCs are plotted. P-values are calculated by a Mann Whitney test.

**Supplementary Table 1: FACS sorting scheme.**

| <b>T-cell type</b> | <b>CD3</b> | <b>CD4</b> | <b>CD8</b> | <b>TCR<math>\gamma\delta</math></b> | <b>CD27</b> | <b>CD45RA</b> | <b>CD45RO</b> |
|--------------------|------------|------------|------------|-------------------------------------|-------------|---------------|---------------|
| CD4 Naive          | +          | +          | -          | -                                   | +           | +             | -             |
| CD4 Effector       | +          | +          | -          | -                                   | -           | +             | -             |
| CD4 Memory         | +          | +          | -          | -                                   | +           | -             | +             |
| CD8 Naive          | +          | -          | +          | -                                   | +           | +             | -             |
| CD8 Effector       | +          | -          | +          | -                                   | -           | +             | -             |
| CD8 Memory         | +          | -          | +          | -                                   | +           | -             | +             |

Supplementary Table 2: Human miR181-5p targets predicted by TargetScan

| Target gene   | Representative transcript | Gene name                                                                                      |
|---------------|---------------------------|------------------------------------------------------------------------------------------------|
| ZNF780B       | ENST00000434248.1         | zinc finger protein 780B                                                                       |
| ZNF594        | ENST00000399604.4         | zinc finger protein 594                                                                        |
| ZNF788        | ENST00000430298.2         | zinc finger family member 788                                                                  |
| ZNF781        | ENST00000358582.4         | zinc finger protein 781                                                                        |
| ZNF471        | ENST00000591537.1         | zinc finger protein 471                                                                        |
| ZNF470        | ENST00000330619.8         | zinc finger protein 470                                                                        |
| ZFP14         | ENST00000270001.7         | ZFP14 zinc finger protein                                                                      |
| ZNF699        | ENST00000591998.1         | zinc finger protein 699                                                                        |
| ZNF283        | ENST00000324461.7         | zinc finger protein 283                                                                        |
| ZNF487        | ENST00000437590.2         | zinc finger protein 487                                                                        |
| ZNF791        | ENST00000446165.1         | zinc finger protein 791                                                                        |
| ZNF266        | ENST00000361451.2         | zinc finger protein 266                                                                        |
| ZFP82         | ENST00000392161.3         | ZFP82 zinc finger protein                                                                      |
| ZNF286B       | ENST00000285274.5         | zinc finger protein 286B                                                                       |
| POC1B-GALNT4  | ENST00000547474.1         | POC1B-GALNT4 readthrough                                                                       |
| RBAK          | ENST00000396912.1         | RB-associated KRAB zinc finger                                                                 |
| ZNF655        | ENST00000425063.1         | zinc finger protein 655                                                                        |
| ZNF23         | ENST00000497160.1         | zinc finger protein 23                                                                         |
| ZNF268        | ENST00000542986.2         | zinc finger protein 268                                                                        |
| ZNF302        | ENST00000505365.2         | zinc finger protein 302                                                                        |
| OSBPL3        | ENST00000313367.2         | oxysterol binding protein-like 3                                                               |
| ZFP30         | ENST00000392144.1         | ZFP30 zinc finger protein                                                                      |
| ZFP62         | ENST00000512132.1         | ZFP62 zinc finger protein                                                                      |
| ZNF256        | ENST00000598928.1         | zinc finger protein 256                                                                        |
| KRBOX4        | ENST00000360017.5         | KRAB box domain containing 4                                                                   |
| ZNF397        | ENST00000330501.7         | zinc finger protein 397                                                                        |
| CTD-2140B24.4 | ENST00000540096.2         | Zinc finger protein 268                                                                        |
| ZNF136        | ENST00000343979.4         | zinc finger protein 136                                                                        |
| GALNT4        | ENST00000529983.2         | UDP-N-acetyl-alpha-D-galactosamine:polypeptide N-acetylgalactosaminyltransferase 4 (GalNAc-T4) |
| ZNF667        | ENST00000591790.1         | zinc finger protein 667                                                                        |
| GSKIP         | ENST00000555181.1         | GSK3B interacting protein                                                                      |
| ARSJ          | ENST00000315366.7         | arylsulfatase family, member J                                                                 |
| ZNF300        | ENST00000427179.1         | zinc finger protein 300                                                                        |
| ZKSCAN1       | ENST00000324306.6         | zinc finger with KRAB and SCAN domains 1                                                       |
| CREBRF        | ENST00000540014.1         | CREB3 regulatory factor                                                                        |
| SRSF7         | ENST00000313117.6         | serine/arginine-rich splicing factor 7                                                         |
| KLF6          | ENST00000542957.1         | Kruppel-like factor 6                                                                          |
| RORB          | ENST00000376896.3         | RAR-related orphan receptor B                                                                  |
| HMBS          | ENST00000392841.1         | hydroxymethylbilane synthase                                                                   |
| FBXO34        | ENST00000313833.4         | F-box protein 34                                                                               |
| RNF34         | ENST00000361234.5         | ring finger protein 34, E3 ubiquitin protein ligase                                            |
| GABRA1        | ENST00000428797.2         | gamma-aminobutyric acid (GABA) A receptor, alpha 1                                             |
| NCALD         | ENST00000395923.1         | neurocalcin delta                                                                              |
| CLVS1         | ENST00000518592.1         | clavesin 1                                                                                     |
| APOO          | ENST00000379226.4         | apolipoprotein O                                                                               |
| RLF           | ENST00000372771.4         | rearranged L-myc fusion                                                                        |
| CTD-2228K2.5  | ENST00000342584.3         | Uncharacterized protein                                                                        |
| C16orf87      | ENST00000394806.2         | chromosome 16 open reading frame 87                                                            |
| C2CD5         | ENST00000333957.4         | C2 calcium-dependent domain containing 5                                                       |
| ESM1          | ENST00000381405.4         | endothelial cell-specific molecule 1                                                           |
| E2F5          | ENST00000418930.2         | E2F transcription factor 5, p130-binding                                                       |
| RBBP7         | ENST00000380087.2         | retinoblastoma binding protein 7                                                               |
| ZNF426        | ENST00000253115.2         | zinc finger protein 426                                                                        |
| ZNF33B        | ENST00000359467.3         | zinc finger protein 33B                                                                        |
| CTDSPL        | ENST00000443503.2         | CTD (carboxy-terminal domain, RNA polymerase II, polypeptide A) small phosphatase-like         |
| LYRM1         | ENST00000396052.2         | LYR motif containing 1                                                                         |
| DERL1         | ENST00000259512.4         | derlin 1                                                                                       |
| PARK2         | ENST00000366898.1         | parkin RBR E3 ubiquitin protein ligase                                                         |
| ASAH2B        | ENST00000374007.1         | N-acylsphingosine amidohydrolase (non-lysosomal ceramidase) 2B                                 |
| PNRC2         | ENST00000334351.7         | proline-rich nuclear receptor coactivator 2                                                    |
| DCUN1D1       | ENST00000292782.4         | DCN1, defective in cullin neddylation 1, domain containing 1                                   |
| TNFRSF11B     | ENST00000297350.4         | tumor necrosis factor receptor superfamily, member 11b                                         |
| C7orf41       | ENST00000324453.8         | chromosome 7 open reading frame 41                                                             |
| SCD           | ENST00000370355.2         | stearoyl-CoA desaturase (delta-9-desaturase)                                                   |
| PRKCD         | ENST00000394729.2         | protein kinase C, delta                                                                        |
| PAPD5         | ENST00000357464.3         | PAP associated domain containing 5                                                             |
| PET117        | ENST00000432901.3         | PET117 homolog (S. cerevisiae)                                                                 |
| CDON          | ENST00000392693.3         | cell adhesion associated, oncogene regulated                                                   |
| BEND3         | ENST00000369042.1         | BEN domain containing 3                                                                        |
| NPEPPS        | ENST00000322157.4         | aminopeptidase puromycin sensitive                                                             |
| SALL4         | ENST00000217086.4         | sal-like 4 (Drosophila)                                                                        |
| LRRC8D        | ENST00000337338.5         | leucine rich repeat containing 8 family, member D                                              |

|          |                   |                                                                                |
|----------|-------------------|--------------------------------------------------------------------------------|
| ADAMTSS  | ENST00000284987.5 | ADAM metallopeptidase with thrombospondin type 1 motif, 5                      |
| SIM1     | ENST00000369208.3 | single-minded homolog 1 ( <i>Drosophila</i> )                                  |
| MED8     | ENST00000372457.4 | mediator complex subunit 8                                                     |
| EXOSC3   | ENST00000396521.3 | exosome component 3                                                            |
| NUS1     | ENST00000368494.3 | nuclear undecaprenyl pyrophosphate synthase 1 homolog ( <i>S. cerevisiae</i> ) |
| ZFP36L1  | ENST00000555997.1 | ZFP36 ring finger protein-like 1                                               |
| CPOX     | ENST00000264193.2 | coproporphyrinogen oxidase                                                     |
| RAB31P   | ENST00000483530.2 | RAB3A interacting protein                                                      |
| ITSN1    | ENST00000379960.5 | intersectin 1 (SH3 domain protein)                                             |
| C2orf69  | ENST00000319974.5 | chromosome 2 open reading frame 69                                             |
| ARHGEF3  | ENST00000296315.3 | Rho guanine nucleotide exchange factor (GEF) 3                                 |
| KIAA0195 | ENST00000314256.7 | KIAA0195                                                                       |
| HOXA11   | ENST00000006015.3 | homeobox A11                                                                   |
| HOXD1    | ENST00000331462.4 | homeobox D1                                                                    |
| CCL8     | ENST00000394620.1 | chemokine (C-C motif) ligand 8                                                 |
| NLN      | ENST00000380985.5 | neurolysin (metallopeptidase M3 family)                                        |
| RAB30    | ENST00000533486.1 | RAB30, member RAS oncogene family                                              |
| OTOGL    | ENST00000458043.2 | otogelin-like                                                                  |
| ST8SIA4  | ENST00000231461.5 | ST8 alpha-N-acetyl-neuraminide alpha-2,8-sialyltransferase 4                   |
| TXNDC12  | ENST00000371626.4 | thioredoxin domain containing 12 (endoplasmic reticulum)                       |
| MLF1     | ENST00000355893.5 | myeloid leukemia factor 1                                                      |
| SPRY4    | ENST00000344120.4 | sprouty homolog 4 ( <i>Drosophila</i> )                                        |
| TOR1AIP2 | ENST00000367612.3 | torsin A interacting protein 2                                                 |
| HOXA1    | ENST00000355633.5 | homeobox A1                                                                    |
| PLCL2    | ENST00000418129.2 | phospholipase C-like 2                                                         |
| KLF15    | ENST00000296233.3 | Kruppel-like factor 15                                                         |
| CBX7     | ENST00000216133.5 | chromobox homolog 7                                                            |
| AP1S3    | ENST00000396654.2 | adaptor-related protein complex 1, sigma 3 subunit                             |
| NOVA1    | ENST00000465357.2 | neuro-oncological ventral antigen 1                                            |
| ZNF536   | ENST00000355537.3 | zinc finger protein 536                                                        |
| MELK     | ENST00000536987.1 | maternal embryonic leucine zipper kinase                                       |
| TMF1     | ENST00000398559.2 | TATA element modulatory factor 1                                               |
| LIN28A   | ENST00000326279.6 | lin-28 homolog A ( <i>C. elegans</i> )                                         |
| HMG2     | ENST00000296503.5 | high mobility group box 2                                                      |
| BCL2     | ENST00000398117.1 | B-cell CLL/lymphoma 2                                                          |
| MB21D2   | ENST00000392452.2 | Mab-21 domain containing 2                                                     |
| SOWAHA   | ENST00000378693.2 | sosondowah ankyrin repeat domain family member A                               |
| TMEM165  | ENST00000381334.5 | transmembrane protein 165                                                      |
| PHLDA1   | ENST00000602540.1 | pleckstrin homology-like domain, family A, member 1                            |
| PROX1    | ENST00000366958.4 | prospero homeobox 1                                                            |
| TNF      | ENST00000449264.2 | tumor necrosis factor                                                          |
| FLT1     | ENST00000282397.4 | fms-related tyrosine kinase 1                                                  |
| LARP4    | ENST00000398473.2 | La ribonucleoprotein domain family, member 4                                   |
| KLF7     | ENST00000423015.1 | Kruppel-like factor 7 (ubiquitous)                                             |
| IL1A     | ENST00000263339.3 | interleukin 1, alpha                                                           |
| LRIG2    | ENST00000361127.5 | leucine-rich repeats and immunoglobulin-like domains 2                         |
| PAM      | ENST00000438793.3 | peptidylglycine alpha-amidating monooxygenase                                  |
| IPO8     | ENST00000256079.4 | importin 8                                                                     |
| DNAJA4   | ENST00000394855.3 | DnaJ (Hsp40) homolog, subfamily A, member 4                                    |
| SELK     | ENST00000541726.1 | Selenoprotein K                                                                |
| NR6A1    | ENST00000487099.2 | nuclear receptor subfamily 6, group A, member 1                                |
| ZFP36L2  | ENST00000282388.3 | ZFP36 ring finger protein-like 2                                               |
| SRPK2    | ENST00000393651.3 | SRSF protein kinase 2                                                          |
| KLHL2    | ENST00000538127.1 | kelch-like family member 2                                                     |
| LIN28B   | ENST00000345080.4 | lin-28 homolog B ( <i>C. elegans</i> )                                         |
| PHP      | ENST00000275034.4 | pleckstrin homology domain interacting protein                                 |
| LMO1     | ENST00000335790.3 | LIM domain only 1 (rhombotin 1)                                                |
| SLC2A3   | ENST00000075120.7 | solute carrier family 2 (facilitated glucose transporter), member 3            |
| BCLAF1   | ENST00000531224.1 | BCL2-associated transcription factor 1                                         |
| SSX2IP   | ENST00000342203.3 | synovial sarcoma, X breakpoint 2 interacting protein                           |
| FKBP1A   | ENST00000400137.4 | FK506 binding protein 1A, 12kDa                                                |
| FAM3C    | ENST00000359943.3 | family with sequence similarity 3, member C                                    |
| MAMDC2   | ENST00000377182.4 | MAM domain containing 2                                                        |
| DEK      | ENST00000397239.3 | DEK oncogene                                                                   |
| FIGN     | ENST00000333129.3 | fidgetin                                                                       |
| IGF2BP2  | ENST00000382199.2 | insulin-like growth factor 2 mRNA binding protein 2                            |
| ADO      | ENST00000373783.1 | 2-aminoethanethiol (cysteamine) dioxygenase                                    |
| GPBP1    | ENST00000424459.3 | GC-rich promoter binding protein 1                                             |
| KANK1    | ENST00000382303.1 | KN motif and ankyrin repeat domains 1                                          |
| ARL5A    | ENST00000295087.8 | ADP-ribosylation factor-like 5A                                                |
| ZNF562   | ENST00000293648.4 | zinc finger protein 562                                                        |
| MARK1    | ENST00000366918.4 | MAP/microtubule affinity-regulating kinase 1                                   |
| MOB3B    | ENST00000262244.5 | MOB kinase activator 3B                                                        |
| PLAG1    | ENST00000316981.3 | pleiomorphic adenoma gene 1                                                    |
| IPPK     | ENST00000287996.3 | inositol 1,3,4,5,6-pentakisphosphate 2-kinase                                  |



|               |                   |                                                                            |
|---------------|-------------------|----------------------------------------------------------------------------|
| ACAP2         | ENST00000326793.6 | ArfGAP with coiled-coil, ankyrin repeat and PH domains 2                   |
| FAM160A2      | ENST00000449352.2 | family with sequence similarity 160, member A2                             |
| FAM19A2       | ENST00000416284.3 | family with sequence similarity 19 (chemokine (C-C motif)-like), member A2 |
| FBXO33        | ENST00000298097.7 | F-box protein 33                                                           |
| SIPA1L2       | ENST00000366630.1 | signal-induced proliferation-associated 1 like 2                           |
| FOXP1         | ENST00000318789.4 | forkhead box P1                                                            |
| FMNL2         | ENST00000475377.2 | formin-like 2                                                              |
| MPP7          | ENST00000375732.1 | membrane protein, palmitoylated 7 (MAGUK p55 subfamily member 7)           |
| CLASP1        | ENST00000409078.3 | cytoplasmic linker associated protein 1                                    |
| SLC25A37      | ENST00000519973.1 | solute carrier family 25 (mitochondrial iron transporter), member 37       |
| SYNPR         | ENST00000479198.1 | synaptoporin                                                               |
| ACVR1C        | ENST00000243349.8 | activin A receptor, type IC                                                |
| TMEM178B      | ENST00000565468.1 | transmembrane protein 178B                                                 |
| DDX3Y         | ENST00000336079.3 | DEAD (Asp-Glu-Ala-Asp) box helicase 3, Y-linked                            |
| KIAA2022      | ENST00000055682.6 | KIAA2022                                                                   |
| NKAIN2        | ENST00000368417.1 | Na <sup>+</sup> /K <sup>+</sup> transporting ATPase interacting 2          |
| SLA           | ENST00000338087.5 | Src-like-adaptor                                                           |
| HS3ST3A1      | ENST00000284110.1 | heparan sulfate (glucosamine) 3-O-sulfotransferase 3A1                     |
| UBP1          | ENST00000283629.3 | upstream binding protein 1 (LBP-1a)                                        |
| CD163         | ENST00000541972.1 | CD163 molecule                                                             |
| SERTAD4       | ENST00000367012.3 | SERTA domain containing 4                                                  |
| ANKRD13C      | ENST00000370944.4 | ankyrin repeat domain 13C                                                  |
| PCDHA7        | ENST00000525929.1 | protocadherin alpha 7                                                      |
| PCDHA5        | ENST00000529859.1 | protocadherin alpha 5                                                      |
| PCDHA12       | ENST00000398631.2 | protocadherin alpha 12                                                     |
| DMXL2         | ENST00000251076.5 | Dmx-like 2                                                                 |
| PCDHA2        | ENST00000526136.1 | protocadherin alpha 2                                                      |
| PCDHA4        | ENST00000530339.1 | protocadherin alpha 4                                                      |
| KRAS          | ENST00000256078.4 | Kirsten rat sarcoma viral oncogene homolog                                 |
| PCDHA6        | ENST00000529310.1 | protocadherin alpha 6                                                      |
| PCDHA8        | ENST00000531613.1 | protocadherin alpha 8                                                      |
| PCDHA11       | ENST00000398640.2 | protocadherin alpha 11                                                     |
| PCDHA1        | ENST00000504120.2 | protocadherin alpha 1                                                      |
| PCDHA3        | ENST00000522353.2 | protocadherin alpha 3                                                      |
| PCDHA9        | ENST00000532602.1 | protocadherin alpha 9                                                      |
| EVI2A         | ENST00000461237.1 | ecotropic viral integration site 2A                                        |
| TGFBR1        | ENST00000374994.4 | transforming growth factor, beta receptor 1                                |
| ZNF449        | ENST00000339249.4 | zinc finger protein 449                                                    |
| PPP4R2        | ENST00000356692.5 | protein phosphatase 4, regulatory subunit 2                                |
| CD69          | ENST00000228434.3 | CD69 molecule                                                              |
| GPR137C       | ENST00000321662.6 | G protein-coupled receptor 137C                                            |
| ZNF800        | ENST00000393313.1 | zinc finger protein 800                                                    |
| GOT2          | ENST00000245206.5 | glutamic-oxaloacetic transaminase 2, mitochondrial                         |
| ANKFY1        | ENST00000341657.4 | ankyrin repeat and FYVE domain containing 1                                |
| ATP1B1        | ENST00000367816.1 | ATPase, Na <sup>+</sup> /K <sup>+</sup> transporting, beta 1 polypeptide   |
| SLC10A7       | ENST00000264986.3 | solute carrier family 10, member 7                                         |
| PRDM4         | ENST00000228437.5 | PR domain containing 4                                                     |
| KPNA4         | ENST00000334256.4 | karyopherin alpha 4 (importin alpha 3)                                     |
| PTBP2         | ENST00000609116.1 | polypyrimidine tract binding protein 2                                     |
| LMO3          | ENST00000354662.1 | LIM domain only 3 (rhombotin-like 2)                                       |
| GPD2          | ENST00000540309.1 | glycerol-3-phosphate dehydrogenase 2 (mitochondrial)                       |
| SCOC          | ENST00000608372.1 | short coiled-coil protein                                                  |
| KIF3B         | ENST00000375712.3 | kinesin family member 3B                                                   |
| PAWR          | ENST00000328827.4 | PRKC, apoptosis, WT1, regulator                                            |
| GHITM         | ENST00000372134.3 | growth hormone inducible transmembrane protein                             |
| SERTAD2       | ENST00000313349.3 | SERTA domain containing 2                                                  |
| RSPO2         | ENST00000517939.1 | R-spondin 2                                                                |
| MBTPS2        | ENST00000379484.5 | membrane-bound transcription factor peptidase, site 2                      |
| SLITRK1       | ENST00000377084.2 | SLIT and NTRK-like family, member 1                                        |
| ZIC2          | ENST00000376335.3 | Zic family member 2                                                        |
| PLAU          | ENST00000372764.3 | plasminogen activator, urokinase                                           |
| TCF7L2        | ENST00000369386.1 | transcription factor 7-like 2 (T-cell specific, HMG-box)                   |
| NEK7          | ENST00000367385.4 | NIMA-related kinase 7                                                      |
| TMEM132D      | ENST00000389441.4 | transmembrane protein 132D                                                 |
| ZNF597        | ENST00000301744.4 | zinc finger protein 597                                                    |
| SMCO1         | ENST00000397537.2 | single-pass membrane protein with coiled-coil domains 1                    |
| TRNP1         | ENST00000522111.2 | TMF1-regulated nuclear protein 1                                           |
| RASSF1        | ENST00000327761.3 | Ras association (RalGDS/AF-6) domain family member 1                       |
| ETS1          | ENST00000531611.1 | v-ets avian erythroblastosis virus E26 oncogene homolog 1                  |
| DYNC1L1I2     | ENST00000258198.2 | dynein, cytoplasmic 1, light intermediate chain 2                          |
| HEXIM1        | ENST00000332499.2 | hexamethylene bis-acetamide inducible 1                                    |
| RAN           | ENST00000543796.1 | RAN, member RAS oncogene family                                            |
| TRIM2         | ENST00000338700.5 | tripartite motif containing 2                                              |
| MSANTD3-TMEFF | ENST00000502978.1 | MSANTD3-TMEFF1 readthrough                                                 |
| FAM222B       | ENST00000582266.1 | family with sequence similarity 222, member B                              |

|            |                   |                                                                               |
|------------|-------------------|-------------------------------------------------------------------------------|
| BCL2L11    | ENST00000393256.3 | BCL2-like 11 (apoptosis facilitator)                                          |
| PARM1      | ENST00000513238.1 | prostate androgen-regulated mucin-like protein 1                              |
| KIF3A      | ENST00000378746.4 | kinesin family member 3A                                                      |
| LHX9       | ENST00000367390.3 | LIM homeobox 9                                                                |
| SNAI2      | ENST0000020945.1  | snail family zinc finger 2                                                    |
| BAI3       | ENST00000370598.1 | brain-specific angiogenesis inhibitor 3                                       |
| TMEFF1     | ENST00000374879.4 | transmembrane protein with EGF-like and two follistatin-like domains 1        |
| TMEM131    | ENST00000186436.5 | transmembrane protein 131                                                     |
| SLC19A2    | ENST00000236137.5 | solute carrier family 19 (thiamine transporter), member 2                     |
| KATNBL1    | ENST00000256544.3 | katanin p80 subunit B-like 1                                                  |
| TMED4      | ENST00000457408.2 | transmembrane emp24 protein transport domain containing 4                     |
| DDX52      | ENST00000349699.2 | DEAD (Asp-Glu-Ala-Asp) box polypeptide 52                                     |
| C11orf30   | ENST00000529032.1 | chromosome 11 open reading frame 30                                           |
| SPECC1L    | ENST00000314328.9 | sperm antigen with calponin homology and coiled-coil domains 1-like           |
| PDAP1      | ENST00000350498.3 | PDGFA associated protein 1                                                    |
| CALM1      | ENST00000356978.4 | calmodulin 1 (phosphorylase kinase, delta)                                    |
| LRRC32     | ENST00000260061.5 | leucine rich repeat containing 32                                             |
| FBXL17     | ENST00000359660.5 | F-box and leucine-rich repeat protein 17                                      |
| SCHIP1     | ENST00000445224.2 | schwannomin interacting protein 1                                             |
| ASAH2      | ENST00000395526.4 | N-acylsphingosine amidohydrolase (non-lysosomal ceramidase) 2                 |
| CBX4       | ENST00000269397.4 | chromobox homolog 4                                                           |
| NMT2       | ENST00000378165.4 | N-myristoyltransferase 2                                                      |
| CALR       | ENST00000316448.5 | calreticulin                                                                  |
| B3GALT1    | ENST00000392690.3 | UDP-Gal:betaGlcNAc beta 1,3-galactosyltransferase, polypeptide 1              |
| RNF182     | ENST00000488300.1 | ring finger protein 182                                                       |
| PIK3R3     | ENST00000262741.5 | phosphoinositide-3-kinase, regulatory subunit 3 (gamma)                       |
| SNN        | ENST00000329565.5 | stannin                                                                       |
| SEC24C     | ENST00000345254.4 | SEC24 family, member C ( <i>S. cerevisiae</i> )                               |
| ASAH2C     | ENST00000426610.2 | N-acylsphingosine amidohydrolase (non-lysosomal ceramidase) 2C                |
| ZDHHC3     | ENST00000296127.3 | zinc finger, DHHC-type containing 3                                           |
| METAP2     | ENST00000323666.5 | methionyl aminopeptidase 2                                                    |
| PPP5K2     | ENST00000321521.9 | diphosphoinositol pentakisphosphate kinase 2                                  |
| POLA1      | ENST00000379068.3 | polymerase (DNA directed), alpha 1, catalytic subunit                         |
| WDR82      | ENST00000296490.3 | WD repeat domain 82                                                           |
| TSC22D2    | ENST00000361875.3 | TSC22 domain family, member 2                                                 |
| NPTN       | ENST00000345330.4 | neuroplastin                                                                  |
| WASF1      | ENST00000392587.2 | WAS protein family, member 1                                                  |
| TBC1D4     | ENST00000377636.3 | TBC1 domain family, member 4                                                  |
| ZNF200     | ENST00000396868.3 | zinc finger protein 200                                                       |
| HEY2       | ENST00000368365.1 | hairly/enhancer-of-split related with YRPW motif 2                            |
| NAAS0      | ENST00000240922.3 | N(alpha)-acetyltransferase 50, NatE catalytic subunit                         |
| RNF145     | ENST00000274542.2 | ring finger protein 145                                                       |
| EIF4A2     | ENST00000323963.5 | eukaryotic translation initiation factor 4A2                                  |
| SIN3B      | ENST00000379803.1 | SIN3 transcription regulator family member B                                  |
| MAP3K3     | ENST00000361357.3 | mitogen-activated protein kinase kinase kinase 3                              |
| ACTA2      | ENST00000224784.6 | actin, alpha 2, smooth muscle, aorta                                          |
| RASSF6     | ENST00000307439.5 | Ras association (RalGDS/AF-6) domain family member 6                          |
| WNK1       | ENST00000315939.6 | WNK lysine deficient protein kinase 1                                         |
| CBLB       | ENST00000264122.4 | Cbl proto-oncogene B, E3 ubiquitin protein ligase                             |
| GREB1L     | ENST00000580732.2 | growth regulation by estrogen in breast cancer-like                           |
| PITPNB     | ENST00000335272.5 | phosphatidylinositol transfer protein, beta                                   |
| ZCCHC14    | ENST00000268616.4 | zinc finger, CCHC domain containing 14                                        |
| ARFGAP1    | ENST00000310078.8 | ArfGAP with FG repeats 1                                                      |
| ARL1       | ENST00000261636.8 | ADP-ribosylation factor-like 1                                                |
| AC012215.1 | ENST00000437887.1 | Uncharacterized protein                                                       |
| PDXDC1     | ENST00000396410.4 | pyridoxal-dependent decarboxylase domain containing 1                         |
| CARD11     | ENST00000396946.4 | caspase recruitment domain family, member 11                                  |
| MBOAT2     | ENST00000305997.3 | membrane bound O-acyltransferase domain containing 2                          |
| PAX9       | ENST00000361487.6 | paired box 9                                                                  |
| RCAN3      | ENST00000374395.4 | RCAN family member 3                                                          |
| MAGOHB     | ENST00000539554.1 | mago-nashi homolog B ( <i>Drosophila</i> )                                    |
| MTPN       | ENST00000393085.3 | myotrophin                                                                    |
| CREBZF     | ENST00000398294.2 | CREB/ATF bZIP transcription factor                                            |
| TMEM106B   | ENST00000396667.3 | transmembrane protein 106B                                                    |
| COL16A1    | ENST00000373672.3 | collagen, type XVI, alpha 1                                                   |
| SS18L1     | ENST00000331758.3 | synovial sarcoma translocation gene on chromosome 18-like 1                   |
| LIF        | ENST00000403987.3 | leukemia inhibitory factor                                                    |
| SHE        | ENST00000304760.2 | Src homology 2 domain containing E                                            |
| PAX5       | ENST00000358127.4 | paired box 5                                                                  |
| GPCPD1     | ENST00000379019.4 | glycerophosphocholine phosphodiesterase GDE1 homolog ( <i>S. cerevisiae</i> ) |
| NR4A3      | ENST00000330847.1 | nuclear receptor subfamily 4, group A, member 3                               |
| DUSP10     | ENST00000366899.3 | dual specificity phosphatase 10                                               |
| AKIRIN1    | ENST00000432648.3 | akirin 1                                                                      |
| SH2B3      | ENST00000341259.2 | SH2B adaptor protein 3                                                        |
| TTC39A     | ENST00000530004.1 | tetratricopeptide repeat domain 39A                                           |

|             |                   |                                                                                               |
|-------------|-------------------|-----------------------------------------------------------------------------------------------|
| ENAH        | ENST00000366844.3 | enabled homolog ( <i>Drosophila</i> )                                                         |
| IGSF11      | ENST00000425327.2 | immunoglobulin superfamily, member 11                                                         |
| UBE2W       | ENST00000517608.1 | ubiquitin-conjugating enzyme E2W (putative)                                                   |
| PNISR       | ENST00000369239.5 | PNN-interacting serine/arginine-rich protein                                                  |
| BRD1        | ENST00000457780.2 | bromodomain containing 1                                                                      |
| THBS4       | ENST00000350881.2 | thrombospondin 4                                                                              |
| ZNF514      | ENST00000295208.2 | zinc finger protein 514                                                                       |
| GLB1L       | ENST00000295759.7 | galactosidase, beta 1-like                                                                    |
| MBOAT1      | ENST00000541730.1 | membrane bound O-acyltransferase domain containing 1                                          |
| NFATC2IP    | ENST00000320805.4 | nuclear factor of activated T-cells, cytoplasmic, calcineurin-dependent 2 interacting protein |
| QKI         | ENST00000392127.2 | QKI, KH domain containing, RNA binding                                                        |
| C6orf89     | ENST00000480824.2 | chromosome 6 open reading frame 89                                                            |
| PSPC1       | ENST00000338910.4 | paraspeckle component 1                                                                       |
| PROX2       | ENST00000556084.2 | prospero homeobox 2                                                                           |
| ZFP69B      | ENST00000484445.1 | ZFP69 zinc finger protein B                                                                   |
| IQCJ-SCHIP1 | ENST00000337808.6 | IQCJ-SCHIP1 readthrough                                                                       |
| LBR         | ENST00000272163.4 | lamin B receptor                                                                              |
| SLC35E1     | ENST00000595753.1 | solute carrier family 35, member E1                                                           |
| DUSP6       | ENST00000279488.7 | dual specificity phosphatase 6                                                                |
| PHTF2       | ENST00000416283.2 | putative homeodomain transcription factor 2                                                   |
| PPP3R1      | ENST00000234310.3 | protein phosphatase 3, regulatory subunit B, alpha                                            |
| PPAP2B      | ENST00000371250.3 | phosphatidic acid phosphatase type 2B                                                         |
| CAPRIN2     | ENST00000395805.2 | caprin family member 2                                                                        |
| QDPR        | ENST00000508623.1 | quinoid dihydropteridine reductase                                                            |
| HS6ST1      | ENST00000259241.6 | heparan sulfate 6-O-sulfotransferase 1                                                        |
| KMT2E       | ENST00000334877.4 | lysine (K)-specific methyltransferase 2E                                                      |
| CAMKK1      | ENST00000381769.2 | calcium/calmodulin-dependent protein kinase kinase 1, alpha                                   |
| NIPAL4      | ENST00000311946.7 | NIPA-like domain containing 4                                                                 |
| SLC25A24    | ENST00000565488.1 | solute carrier family 25 (mitochondrial carrier; phosphate carrier), member 24                |
| AK3         | ENST00000381809.3 | adenylate kinase 3                                                                            |
| HOXB8       | ENST00000239144.4 | homeobox B8                                                                                   |
| B4GALT1     | ENST00000379731.4 | UDP-Gal:betaGlcNAc beta 1,4-galactosyltransferase, polypeptide 1                              |
| ZDHHC7      | ENST00000313732.4 | zinc finger, DHHC-type containing 7                                                           |
| ST8SIA3     | ENST00000324000.3 | ST8 alpha-N-acetyl-neuraminide alpha-2,8-sialyltransferase 3                                  |
| SMAP1       | ENST00000370452.3 | small ArfGAP 1                                                                                |
| LRBA        | ENST00000535741.1 | LPS-responsive vesicle trafficking, beach and anchor containing                               |
| PBX3        | ENST00000342287.5 | pre-B-cell leukemia homeobox 3                                                                |
| DOCK7       | ENST00000251157.5 | dedicator of cytokinesis 7                                                                    |
| PDHX        | ENST00000448838.3 | pyruvate dehydrogenase complex, component X                                                   |
| CUL4A       | ENST00000326335.4 | cullin 4A                                                                                     |
| TAF13       | ENST00000338366.5 | TAF13 RNA polymerase II, TATA box binding protein (TBP)-associated factor, 18kDa              |
| NKRF        | ENST00000371527.1 | NFKB repressing factor                                                                        |
| YOD1        | ENST00000315927.4 | YOD1 deubiquitinase                                                                           |
| WSB2        | ENST00000315436.3 | WD repeat and SOCS box containing 2                                                           |
| ELAVL4      | ENST00000371824.1 | ELAV like neuron-specific RNA binding protein 4                                               |
| FAM160A1    | ENST00000435205.1 | family with sequence similarity 160, member A1                                                |
| RAB11A      | ENST00000569896.1 | RAB11A, member RAS oncogene family                                                            |
| UBN2        | ENST00000473989.3 | ubiquitin 2                                                                                   |
| RBM47       | ENST00000319592.4 | RNA binding motif protein 47                                                                  |
| SIX2        | ENST00000303077.6 | SIX homeobox 2                                                                                |
| WNT9A       | ENST00000272164.5 | wingless-type MMTV integration site family, member 9A                                         |
| CALCR       | ENST00000359558.2 | calcitonin receptor                                                                           |
| TGFBR2      | ENST00000359013.4 | transforming growth factor, beta receptor II (70/80kDa)                                       |
| SSBP2       | ENST00000320672.4 | single-stranded DNA binding protein 2                                                         |
| ZSWIM1      | ENST00000372523.1 | zinc finger, SWIM-type containing 1                                                           |
| IMP2        | ENST00000193391.7 | interphotoreceptor matrix proteoglycan 2                                                      |
| ONECUT2     | ENST00000491143.2 | one cut homeobox 2                                                                            |
| AAK1        | ENST00000409085.4 | AP2 associated kinase 1                                                                       |
| PHOX2B      | ENST00000226382.2 | paired-like homeobox 2b                                                                       |
| USP9Y       | ENST00000338981.3 | ubiquitin specific peptidase 9, Y-linked                                                      |
| RAB8B       | ENST00000321437.4 | RAB8B, member RAS oncogene family                                                             |
| ZADH2       | ENST00000322342.3 | zinc binding alcohol dehydrogenase domain containing 2                                        |
| CNTN4       | ENST00000427331.1 | contactin 4                                                                                   |
| DCAF16      | ENST00000382247.1 | DDB1 and CUL4 associated factor 16                                                            |
| PDIA6       | ENST00000272227.3 | protein disulfide isomerase family A, member 6                                                |
| DCBLD2      | ENST00000326840.6 | discoidin, CUB and LCCL domain containing 2                                                   |
| RORA        | ENST00000335670.6 | RAR-related orphan receptor A                                                                 |
| HOXB4       | ENST00000332503.5 | homeobox B4                                                                                   |
| MIER3       | ENST00000381226.3 | mesoderm induction early response 1, family member 3                                          |
| BIRC6       | ENST00000421745.2 | baculoviral IAP repeat containing 6                                                           |
| TRIM71      | ENST00000383763.5 | tripartite motif containing 71, E3 ubiquitin protein ligase                                   |
| TOX         | ENST00000361421.1 | thymocyte selection-associated high mobility group box                                        |
| FAM135A     | ENST00000418814.2 | family with sequence similarity 135, member A                                                 |
| CNNM2       | ENST00000369878.4 | cyclin M2                                                                                     |
| GABRA4      | ENST00000264318.3 | gamma-aminobutyric acid (GABA) A receptor, alpha 4                                            |

|          |                   |                                                                                           |
|----------|-------------------|-------------------------------------------------------------------------------------------|
| ZBTB43   | ENST00000449886.1 | zinc finger and BTB domain containing 43                                                  |
| YWHAG    | ENST00000307630.3 | tyrosine 3-monooxygenase/tryptophan 5-monooxygenase activation protein, gamma polypeptide |
| ATP2B2   | ENST00000352432.4 | ATPase, Ca <sup>++</sup> transporting, plasma membrane 2                                  |
| E2F7     | ENST00000416496.2 | E2F transcription factor 7                                                                |
| PAK7     | ENST00000378423.1 | p21 protein (Cdc42/Rac)-activated kinase 7                                                |
| SAMD12   | ENST00000409003.4 | sterile alpha motif domain containing 12                                                  |
| TUSC3    | ENST00000503731.1 | tumor suppressor candidate 3                                                              |
| GRB10    | ENST00000398812.2 | growth factor receptor-bound protein 10                                                   |
| MOSPD1   | ENST00000370783.3 | motile sperm domain containing 1                                                          |
| CYLD     | ENST00000540145.1 | cylindromatosis (turban tumor syndrome)                                                   |
| MED26    | ENST00000263390.3 | mediator complex subunit 26                                                               |
| FAM58A   | ENST00000406277.2 | family with sequence similarity 58, member A                                              |
| KITLG    | ENST00000228280.5 | KIT ligand                                                                                |
| GNAQ     | ENST00000286548.4 | guanine nucleotide binding protein (G protein), q polypeptide                             |
| AHNAK    | ENST00000378024.4 | AHNAK nucleoprotein                                                                       |
| RAD21    | ENST00000297338.2 | RAD21 homolog (S. pombe)                                                                  |
| TMCC1    | ENST00000432054.2 | transmembrane and coiled-coil domain family 1                                             |
| AKT3     | ENST00000366539.1 | v-akt murine thymoma viral oncogene homolog 3                                             |
| ANKRD44  | ENST00000282272.8 | ankyrin repeat domain 44                                                                  |
| EMC1     | ENST00000477853.1 | ER membrane protein complex subunit 1                                                     |
| PRKAR2A  | ENST00000265563.8 | protein kinase, cAMP-dependent, regulatory, type II, alpha                                |
| NREP     | ENST00000379671.3 | neuronal regeneration related protein                                                     |
| MFAP3L   | ENST00000393704.3 | microfibrillar-associated protein 3-like                                                  |
| CYP26B1  | ENST00000001146.2 | cytochrome P450, family 26, subfamily B, polypeptide 1                                    |
| CCNG1    | ENST00000340828.2 | cyclin G1                                                                                 |
| HEPHL1   | ENST00000315765.9 | hephaestin-like 1                                                                         |
| BAZ2B    | ENST00000392782.1 | bromodomain adjacent to zinc finger domain, 2B                                            |
| MITF     | ENST00000328528.6 | microphthalmia-associated transcription factor                                            |
| DNAJB1   | ENST00000254322.2 | DnaJ (Hsp40) homolog, subfamily B, member 1                                               |
| LMBRD2   | ENST00000296603.4 | LMBRD1 domain containing 2                                                                |
| CCNK     | ENST00000389879.5 | cyclin K                                                                                  |
| CYR61    | ENST00000451137.2 | cysteine-rich, angiogenic inducer, 61                                                     |
| CAMSAP2  | ENST00000358823.2 | calmodulin regulated spectrin-associated protein family, member 2                         |
| TBL1XR1  | ENST00000430069.1 | transducin (beta)-like 1 X-linked receptor 1                                              |
| NOG      | ENST00000332822.4 | noggin                                                                                    |
| PHACTR4  | ENST00000373839.3 | phosphatase and actin regulator 4                                                         |
| CARM1    | ENST00000327064.4 | coactivator-associated arginine methyltransferase 1                                       |
| TNPO1    | ENST00000337273.5 | transportin 1                                                                             |
| KLHL42   | ENST00000381271.2 | kelch-like family member 42                                                               |
| HECA     | ENST00000367658.2 | headcase homolog (Drosophila)                                                             |
| ANP32A   | ENST00000465139.2 | acidic (leucine-rich) nuclear phosphoprotein 32 family, member A                          |
| PRIMA1   | ENST00000393140.1 | proline rich membrane anchor 1                                                            |
| EMX2     | ENST00000442245.4 | empty spiracles homeobox 2                                                                |
| ERG      | ENST00000398905.1 | v-ets avian erythroblastosis virus E26 oncogene homolog                                   |
| ZDHHC21  | ENST00000380916.4 | zinc finger, DHHC-type containing 21                                                      |
| DNAJB14  | ENST00000442697.2 | DnaJ (Hsp40) homolog, subfamily B, member 14                                              |
| ZFAND5   | ENST00000237937.3 | zinc finger, AN1-type domain 5                                                            |
| SAMHD1   | ENST00000262878.4 | SAM domain and HD domain 1                                                                |
| NAB1     | ENST00000337386.5 | NGFI-A binding protein 1 (EGR1 binding protein 1)                                         |
| CXADR    | ENST00000356275.6 | coxsackie virus and adenovirus receptor                                                   |
| TRPM7    | ENST00000560955.1 | transient receptor potential cation channel, subfamily M, member 7                        |
| YWHAZ    | ENST00000395957.2 | tyrosine 3-monooxygenase/tryptophan 5-monooxygenase activation protein, zeta polypeptide  |
| ATP2B1   | ENST00000261173.2 | ATPase, Ca <sup>++</sup> transporting, plasma membrane 1                                  |
| GPSM1    | ENST00000440944.1 | G-protein signaling modulator 1                                                           |
| USP33    | ENST00000370794.3 | ubiquitin specific peptidase 33                                                           |
| TMEM64   | ENST00000458549.2 | transmembrane protein 64                                                                  |
| MYCBP    | ENST00000397572.2 | MYC binding protein                                                                       |
| C6orf62  | ENST00000378119.4 | chromosome 6 open reading frame 62                                                        |
| ADAT2    | ENST00000606514.1 | adenosine deaminase, tRNA-specific 2                                                      |
| ZFP1     | ENST00000464850.1 | ZFP1 zinc finger protein                                                                  |
| USP15    | ENST00000353364.3 | ubiquitin specific peptidase 15                                                           |
| MTMR10   | ENST00000435680.1 | myotubularin related protein 10                                                           |
| TM9SF3   | ENST00000371142.4 | transmembrane 9 superfamily member 3                                                      |
| PRICKLE2 | ENST00000295902.6 | prickle homolog 2 (Drosophila)                                                            |
| ELMSAN1  | ENST00000394071.2 | ELM2 and Myb/SANT-like domain containing 1                                                |
| ATP8B2   | ENST00000368489.3 | ATPase, aminophospholipid transporter, class I, type 8B, member 2                         |
| IGF2BP3  | ENST00000258729.3 | insulin-like growth factor 2 mRNA binding protein 3                                       |
| WIF1     | ENST00000286574.4 | WNT inhibitory factor 1                                                                   |
| ARID2    | ENST00000457135.1 | AT rich interactive domain 2 (ARID, RFX-like)                                             |
| EED      | ENST00000327320.4 | embryonic ectoderm development                                                            |
| TPST2    | ENST00000338754.4 | tyrosylprotein sulfotransferase 2                                                         |
| CRYBG3   | ENST00000389622.2 | beta-gamma crystallin domain containing 3                                                 |
| CUL3     | ENST00000264414.4 | cullin 3                                                                                  |
| WASL     | ENST00000223023.4 | Wiskott-Aldrich syndrome-like                                                             |
| DLGAP2   | ENST00000421627.2 | discs, large (Drosophila) homolog-associated protein 2                                    |

|         |                   |                                                                         |
|---------|-------------------|-------------------------------------------------------------------------|
| ZNF697  | ENST00000421812.2 | zinc finger protein 697                                                 |
| SF1     | ENST00000377390.3 | splicing factor 1                                                       |
| CHIC1   | ENST00000373504.6 | cysteine-rich hydrophobic domain 1                                      |
| FAM89A  | ENST00000366654.4 | family with sequence similarity 89, member A                            |
| NPTXR   | ENST00000333039.2 | neuronal pentraxin receptor                                             |
| POM121C | ENST00000257665.5 | POM121 transmembrane nucleoporin C                                      |
| CEP97   | ENST00000341893.3 | centrosomal protein 97kDa                                               |
| SPIRE1  | ENST00000409402.4 | spire-type actin nucleation factor 1                                    |
| RIMKLB  | ENST00000357529.3 | ribosomal modification protein rimK-like family member B                |
| FBXL3   | ENST00000355619.5 | F-box and leucine-rich repeat protein 3                                 |
| STK10   | ENST00000176763.5 | serine/threonine kinase 10                                              |
| MYBL1   | ENST00000522677.3 | v-myb avian myeloblastosis viral oncogene homolog-like 1                |
| OTUD4   | ENST00000454497.2 | OTU domain containing 4                                                 |
| EYA3    | ENST00000373871.3 | eyes absent homolog 3 (Drosophila)                                      |
| CDK8    | ENST00000536792.1 | cyclin-dependent kinase 8                                               |
| TTL7    | ENST00000260505.8 | tubulin tyrosine ligase-like family, member 7                           |
| CREB1   | ENST00000432329.2 | cAMP responsive element binding protein 1                               |
| DUSP5   | ENST00000369583.3 | dual specificity phosphatase 5                                          |
| VCAM1   | ENST00000347652.2 | vascular cell adhesion molecule 1                                       |
| DCLK3   | ENST00000416516.2 | doublecortin-like kinase 3                                              |
| EPN2    | ENST00000314728.5 | epsin 2                                                                 |
| YTHDC1  | ENST00000344157.4 | YTH domain containing 1                                                 |
| RPS6KA6 | ENST00000262752.2 | ribosomal protein S6 kinase, 90kDa, polypeptide 6                       |
| HNRNPK  | ENST00000376281.4 | heterogeneous nuclear ribonucleoprotein K                               |
| MARCKS  | ENST00000368635.4 | myristoylated alanine-rich protein kinase C substrate                   |
| MYO1E   | ENST00000288235.4 | myosin IE                                                               |
| ABI1    | ENST00000376170.4 | abl-interactor 1                                                        |
| BCL6    | ENST00000406870.2 | B-cell CLL/lymphoma 6                                                   |
| RFTN2   | ENST00000295049.4 | raftlin family member 2                                                 |
| GNB4    | ENST00000232564.3 | guanine nucleotide binding protein (G protein), beta polypeptide 4      |
| LRRN1   | ENST00000319331.3 | leucine rich repeat neuronal 1                                          |
| PGRMC2  | ENST00000296425.5 | progesterone receptor membrane component 2                              |
| ENTPD6  | ENST00000433259.2 | ectonucleoside triphosphate diphosphohydrolase 6 (putative)             |
| NRXN1   | ENST00000342183.5 | neurexin 1                                                              |
| SIAE    | ENST00000263593.3 | sialic acid acetyltransferase                                           |
| MAP3K8  | ENST00000375321.1 | mitogen-activated protein kinase kinase kinase 8                        |
| ELAVL2  | ENST00000380110.4 | ELAV like neuron-specific RNA binding protein 2                         |
| TGIF2   | ENST00000373874.2 | TGFB-induced factor homeobox 2                                          |
| SACM1L  | ENST00000389061.5 | SAC1 suppressor of actin mutations 1-like (yeast)                       |
| CDH8    | ENST00000584337.1 | cadherin 8, type 2                                                      |
| HSPA5   | ENST00000324460.6 | heat shock 70kDa protein 5 (glucose-regulated protein, 78kDa)           |
| PPP1R2  | ENST00000328432.3 | protein phosphatase 1, regulatory (inhibitor) subunit 2                 |
| HOXB5   | ENST00000239151.5 | homeobox B5                                                             |
| XRN1    | ENST00000264951.4 | 5'-3' exoribonuclease 1                                                 |
| THRB    | ENST00000396671.2 | thyroid hormone receptor, beta                                          |
| CNR1    | ENST00000362094.5 | cannabinoid receptor 1 (brain)                                          |
| NIPBL   | ENST00000448238.2 | Nipped-B homolog (Drosophila)                                           |
| ATXN3   | ENST00000545170.1 | ataxin 3                                                                |
| SOS1    | ENST00000426016.1 | son of sevenless homolog 1 (Drosophila)                                 |
| CSTF3   | ENST00000323959.4 | cleavage stimulation factor, 3' pre-RNA, subunit 3, 77kDa               |
| PODXL   | ENST00000541194.1 | podocalyxin-like                                                        |
| ERF     | ENST00000222329.4 | Ets2 repressor factor                                                   |
| GMPS    | ENST00000496455.2 | guanine monophosphate synthase                                          |
| HCN1    | ENST00000303230.4 | hyperpolarization activated cyclic nucleotide-gated potassium channel 1 |
| SLC26A9 | ENST00000367135.3 | solute carrier family 26 (anion exchanger), member 9                    |
| SOCS3   | ENST00000330871.2 | suppressor of cytokine signaling 3                                      |
| RNF38   | ENST00000259605.6 | ring finger protein 38                                                  |
| NEGR1   | ENST00000357731.5 | neuronal growth regulator 1                                             |
| DERL2   | ENST00000572834.1 | derlin 2                                                                |
| CDC5L   | ENST00000371477.3 | cell division cycle 5-like                                              |
| PANK3   | ENST00000239231.6 | pantothenate kinase 3                                                   |
| RNF141  | ENST00000265981.2 | ring finger protein 141                                                 |
| EPHA4   | ENST00000281821.2 | EPH receptor A4                                                         |
| PAK4    | ENST00000599386.1 | p21 protein (Cdc42/Rac)-activated kinase 4                              |
| KCNA4   | ENST00000328224.6 | potassium voltage-gated channel, shaker-related subfamily, member 4     |
| DPYSL2  | ENST00000311151.5 | dihydropyrimidinase-like 2                                              |
| RAD23B  | ENST00000358015.3 | RAD23 homolog B (S. cerevisiae)                                         |
| MAPK1   | ENST00000215832.6 | mitogen-activated protein kinase 1                                      |
| CDC73   | ENST00000367435.3 | cell division cycle 73                                                  |
| ZNF704  | ENST00000327835.3 | zinc finger protein 704                                                 |
| CCDC64  | ENST00000397558.2 | coiled-coil domain containing 64                                        |
| F2R     | ENST00000319211.4 | coagulation factor II (thrombin) receptor                               |
| FAM13B  | ENST0000033079.3  | family with sequence similarity 13, member B                            |
| LLPH    | ENST00000266604.2 | LLP homolog, long-term synaptic facilitation (Aplysia)                  |
| AMER2   | ENST00000357816.2 | APC membrane recruitment protein 2                                      |

|            |                   |                                                                                        |
|------------|-------------------|----------------------------------------------------------------------------------------|
| KIAA1644   | ENST00000381176.4 | KIAA1644                                                                               |
| RLIM       | ENST00000332687.6 | ring finger protein, LIM domain interacting                                            |
| TRPM3      | ENST00000377110.3 | transient receptor potential cation channel, subfamily M, member 3                     |
| PRKG1      | ENST00000373985.1 | protein kinase, cGMP-dependent, type I                                                 |
| TOPBP1     | ENST00000260810.5 | topoisomerase (DNA) II binding protein 1                                               |
| FGFR3      | ENST00000340107.4 | fibroblast growth factor receptor 3                                                    |
| PURB       | ENST00000395699.2 | purine-rich element binding protein B                                                  |
| PRLR       | ENST00000342362.5 | prolactin receptor                                                                     |
| DRD1       | ENST00000393752.2 | dopamine receptor D1                                                                   |
| PTBP3      | ENST00000374257.1 | polypyrimidine tract binding protein 3                                                 |
| CNKSR3     | ENST00000607772.1 | CNKSR family member 3                                                                  |
| STIM2      | ENST00000467011.1 | stromal interaction molecule 2                                                         |
| CACNA2D1   | ENST00000356860.3 | calcium channel, voltage-dependent, alpha 2/delta subunit 1                            |
| ING5       | ENST00000313552.6 | inhibitor of growth family, member 5                                                   |
| CHMP1B     | ENST00000526991.2 | charged multivesicular body protein 1B                                                 |
| TBCEL      | ENST00000422003.2 | tubulin folding cofactor E-like                                                        |
| SENP1      | ENST00000004980.5 | SUMO1/sentrin specific peptidase 1                                                     |
| SOCS2      | ENST00000548537.1 | suppressor of cytokine signaling 2                                                     |
| UGCG       | ENST00000374279.3 | UDP-glucose ceramide glucosyltransferase                                               |
| GRIK3      | ENST00000373091.3 | glutamate receptor, ionotropic, kainate 3                                              |
| KIAA0247   | ENST00000342745.4 | KIAA0247                                                                               |
| SHOC2      | ENST00000369452.4 | soc-2 suppressor of clear homolog (C. elegans)                                         |
| ENOX2      | ENST00000370935.1 | ecto-NOX disulfide-thiol exchanger 2                                                   |
| PICALM     | ENST00000532317.1 | phosphatidylinositol binding clathrin assembly protein                                 |
| TXK        | ENST00000264316.4 | TXK tyrosine kinase                                                                    |
| TRAK2      | ENST00000332624.3 | trafficking protein, kinesin binding 2                                                 |
| SEMA3C     | ENST00000265361.3 | sema domain, immunoglobulin domain (Ig), short basic domain, secreted, (semaphorin) 3C |
| EVX2       | ENST00000308618.4 | even-skipped homeobox 2                                                                |
| TNS3       | ENST00000311160.9 | tensin 3                                                                               |
| TMEM151B   | ENST00000451188.2 | transmembrane protein 151B                                                             |
| ZNF772     | ENST00000425074.3 | zinc finger protein 772                                                                |
| TM9SF4     | ENST00000398022.2 | transmembrane 9 superfamily protein member 4                                           |
| MYCBP2     | ENST00000544440.2 | MYC binding protein 2, E3 ubiquitin protein ligase                                     |
| NUP155     | ENST00000231498.3 | nucleoporin 155kDa                                                                     |
| RBM22      | ENST00000199814.4 | RNA binding motif protein 22                                                           |
| ATXN1      | ENST00000244769.4 | ataxin 1                                                                               |
| SLC4A10    | ENST00000415876.2 | solute carrier family 4, sodium bicarbonate transporter, member 10                     |
| MAPK1IP1L  | ENST00000395468.4 | mitogen-activated protein kinase 1 interacting protein 1-like                          |
| ERO1L      | ENST00000395686.3 | ERO1-like (S. cerevisiae)                                                              |
| ZNF207     | ENST00000394670.4 | zinc finger protein 207                                                                |
| NFIB       | ENST00000397575.3 | nuclear factor I/B                                                                     |
| PIK3CB     | ENST00000477593.1 | phosphatidylinositol-4,5-bisphosphate 3-kinase, catalytic subunit beta                 |
| MADD       | ENST00000406482.1 | MAP-kinase activating death domain                                                     |
| HAND2      | ENST00000359562.4 | heart and neural crest derivatives expressed 2                                         |
| RNF146     | ENST00000356799.2 | ring finger protein 146                                                                |
| DAZAP2     | ENST00000412716.3 | DAZ associated protein 2                                                               |
| FAM171A1   | ENST00000378116.4 | family with sequence similarity 171, member A1                                         |
| LNX2       | ENST00000316334.3 | ligand of numb-protein X 2                                                             |
| NMT1       | ENST00000592782.1 | N-myristoyltransferase 1                                                               |
| IFRG15     | ENST00000553856.1 | Homo sapiens torsin A interacting protein 2 (TOR1AIP2), transcript variant 1, mRNA.    |
| CDK17      | ENST00000543119.2 | cyclin-dependent kinase 17                                                             |
| STC1       | ENST00000290271.2 | stanniocalcin 1                                                                        |
| FLJ00104   | ENST00000446344.1 | HCG1980662; Uncharacterized protein                                                    |
| ECT2L      | ENST00000423192.1 | epithelial cell transforming sequence 2 oncogene-like                                  |
| SEL1L      | ENST00000336735.4 | sel-1 suppressor of lin-12-like (C. elegans)                                           |
| ZEB2       | ENST00000558170.2 | zinc finger E-box binding homeobox 2                                                   |
| G3BP2      | ENST00000395719.3 | GTPase activating protein (SH3 domain) binding protein 2                               |
| AL590483.1 | ENST00000598000.1 | Uncharacterized protein; cDNA FLJ42623 fis, clone BRACE3015894                         |
| HMGB1      | ENST00000399489.1 | high mobility group box 1                                                              |
| PPP1CB     | ENST00000395366.2 | protein phosphatase 1, catalytic subunit, beta isozyme                                 |
| PHF2       | ENST00000375376.4 | PHD finger protein 2                                                                   |
| INHBA      | ENST00000242208.4 | inhibin, beta A                                                                        |
| CDYL       | ENST00000343762.5 | chromodomain protein, Y-like                                                           |
| GDI1       | ENST00000447750.2 | GDP dissociation inhibitor 1                                                           |
| POLQ       | ENST00000264233.5 | polymerase (DNA directed), theta                                                       |
| PUM1       | ENST00000424085.2 | pumilio RNA-binding family member 1                                                    |
| POU2F1     | ENST00000367866.2 | POU class 2 homeobox 1                                                                 |
| CHURC1     | ENST00000548752.2 | churchill domain containing 1                                                          |
| ZBTB7A     | ENST00000322357.4 | zinc finger and BTB domain containing 7A                                               |
| PKN2       | ENST00000370521.3 | protein kinase N2                                                                      |
| SGK3       | ENST00000345714.4 | serum/glucocorticoid regulated kinase family, member 3                                 |
| LPP        | ENST00000312675.1 | LIM domain containing preferred translocation partner in lipoma                        |
| KLHL3      | ENST00000541417.1 | kelch-like family member 3                                                             |
| DIP2A      | ENST00000318711.7 | DIP2 disco-interacting protein 2 homolog A (Drosophila)                                |
| PDPK1      | ENST00000441549.3 | 3-phosphoinositide dependent protein kinase-1                                          |

|              |                   |                                                                                             |
|--------------|-------------------|---------------------------------------------------------------------------------------------|
| MEX3A        | ENST00000532414.2 | mex-3 RNA binding family member A                                                           |
| TRANK1       | ENST00000428977.2 | tetratricopeptide repeat and ankyrin repeat containing 1                                    |
| ZNF664       | ENST00000538932.2 | zinc finger protein 664                                                                     |
| WWC2         | ENST00000403733.3 | WW and C2 domain containing 2                                                               |
| LGALS1       | ENST00000409537.2 | lectin, galactoside-binding-like                                                            |
| SLC38A2      | ENST00000256689.5 | solute carrier family 38, member 2                                                          |
| USP8         | ENST00000396444.3 | ubiquitin specific peptidase 8                                                              |
| INO80D       | ENST00000403263.1 | INO80 complex subunit D                                                                     |
| INPP5E       | ENST00000371712.3 | inositol polyphosphate-5-phosphatase, 72 kDa                                                |
| LRP12        | ENST00000424843.2 | low density lipoprotein receptor-related protein 12                                         |
| DOCK4        | ENST00000428084.1 | dedicator of cytokinesis 4                                                                  |
| ZZZ3         | ENST00000370801.3 | zinc finger, ZZ-type containing 3                                                           |
| NR3C1        | ENST00000394464.2 | nuclear receptor subfamily 3, group C, member 1 (glucocorticoid receptor)                   |
| NFATC2       | ENST00000371564.3 | nuclear factor of activated T-cells, cytoplasmic, calcineurin-dependent 2                   |
| XIAP         | ENST00000371199.3 | X-linked inhibitor of apoptosis                                                             |
| IRS2         | ENST00000375856.3 | insulin receptor substrate 2                                                                |
| SFRP4        | ENST00000436072.2 | secreted frizzled-related protein 4                                                         |
| TBL1X        | ENST00000407597.2 | transducin (beta)-like 1X-linked                                                            |
| LGI2         | ENST00000382114.4 | leucine-rich repeat LGI family, member 2                                                    |
| KSR1         | ENST00000398988.3 | kinase suppressor of ras 1                                                                  |
| NAALADL2     | ENST00000454872.1 | N-acetylated alpha-linked acidic dipeptidase-like 2                                         |
| ARHGEF37     | ENST00000333677.6 | Rho guanine nucleotide exchange factor (GEF) 37                                             |
| ZBTB8B       | ENST00000609129.1 | zinc finger and BTB domain containing 8B                                                    |
| ZNF24        | ENST00000589881.1 | zinc finger protein 24                                                                      |
| PTEN         | ENST00000371953.3 | phosphatase and tensin homolog                                                              |
| GRIK2        | ENST00000413795.1 | glutamate receptor, ionotropic, kainate 2                                                   |
| ZBTB34       | ENST00000319119.4 | zinc finger and BTB domain containing 34                                                    |
| FHAD1        | ENST00000358897.4 | forkhead-associated (FHA) phosphopeptide binding domain 1                                   |
| MBLAC2       | ENST00000316610.6 | metallo-beta-lactamase domain containing 2                                                  |
| YTHDF2       | ENST00000373812.3 | YTH domain family, member 2                                                                 |
| SLC16A6      | ENST00000327268.4 | solute carrier family 16, member 6                                                          |
| COLQ         | ENST00000383785.2 | collagen-like tail subunit (single strand of homotrimer) of asymmetric acetylcholinesterase |
| RNF32        | ENST00000311822.8 | ring finger protein 32                                                                      |
| DNAJC21      | ENST00000382021.2 | DnaJ (Hsp40) homolog, subfamily C, member 21                                                |
| CLIP1        | ENST00000361654.4 | CAP-GLY domain containing linker protein 1                                                  |
| AGO4         | ENST00000373210.3 | argonaute RISC catalytic component 4                                                        |
| PDE10A       | ENST00000366882.1 | phosphodiesterase 10A                                                                       |
| ACER3        | ENST00000532485.1 | alkaline ceramidase 3                                                                       |
| KLHL14       | ENST00000359358.4 | kelch-like family member 14                                                                 |
| TBC1D2B      | ENST00000409931.3 | TBC1 domain family, member 2B                                                               |
| ATP8B1       | ENST00000283684.4 | ATPase, aminophospholipid transporter, class I, type 8B, member 1                           |
| DYNLL2       | ENST00000579991.2 | dynein, light chain, LC8-type 2                                                             |
| SOGA2        | ENST00000359865.3 | SOGA family member 2                                                                        |
| TAB3         | ENST00000378933.1 | TGF-beta activated kinase 1/MAP3K7 binding protein 3                                        |
| PAFAH1B2     | ENST00000527958.1 | platelet-activating factor acetylhydrolase 1b, catalytic subunit 2 (30kDa)                  |
| RSF1         | ENST00000308488.6 | remodeling and spacing factor 1                                                             |
| ABHD13       | ENST00000375898.3 | abhydrolase domain containing 13                                                            |
| HGF          | ENST00000222390.5 | hepatocyte growth factor (hepapoietin A; scatter factor)                                    |
| RASSF2       | ENST00000379400.3 | Ras association (RalGDS/AF-6) domain family member 2                                        |
| ACVR2B       | ENST00000352511.4 | activin A receptor, type IIB                                                                |
| PKP2         | ENST00000340811.4 | plakophilin 2                                                                               |
| C8orf44-SGK3 | ENST00000519289.1 | C8orf44-SGK3 readthrough                                                                    |
| GRM7         | ENST00000486284.1 | glutamate receptor, metabotropic 7                                                          |
| CAMK2G       | ENST00000351293.3 | calcium/calmodulin-dependent protein kinase II gamma                                        |
| MNX1         | ENST00000252971.6 | motor neuron and pancreas homeobox 1                                                        |
| MBNL2        | ENST00000345429.6 | muscleblind-like splicing regulator 2                                                       |
| BMF          | ENST00000220446.4 | Bcl2 modifying factor                                                                       |
| DR1          | ENST00000370272.4 | down-regulator of transcription 1, TBP-binding (negative cofactor 2)                        |
| KMT2C        | ENST00000262189.6 | lysine (K)-specific methyltransferase 2C                                                    |
| SLC35F1      | ENST00000360388.4 | solute carrier family 35, member F1                                                         |
| PLA2G4A      | ENST00000367466.3 | phospholipase A2, group IVA (cytosolic, calcium-dependent)                                  |
| AKAP5        | ENST00000394718.4 | A kinase (PRKA) anchor protein 5                                                            |
| RNF150       | ENST00000515673.2 | ring finger protein 150                                                                     |
| PALM2        | ENST00000448454.2 | paralemmin 2                                                                                |
| MTF2         | ENST00000370298.4 | metal response element binding transcription factor 2                                       |
| CBFA2T3      | ENST00000327483.5 | core-binding factor, runt domain, alpha subunit 2; translocated to, 3                       |
| MIP          | ENST00000257979.4 | major intrinsic protein of lens fiber                                                       |
| SLC35A3      | ENST00000465289.1 | solute carrier family 35 (UDP-N-acetylglucosamine (UDP-GlcNAc) transporter), member A3      |
| KCNQ5        | ENST00000370398.1 | potassium voltage-gated channel, KQT-like subfamily, member 5                               |
| TEAD1        | ENST00000361905.4 | TEA domain family member 1 (SV40 transcriptional enhancer factor)                           |
| HIPK2        | ENST00000406875.3 | homeodomain interacting protein kinase 2                                                    |
| GCNT2        | ENST00000316170.3 | glucosaminyl (N-acetyl) transferase 2, I-branching enzyme (I blood group)                   |
| DSC1         | ENST00000257197.3 | desmocollin 1                                                                               |
| PTGR2        | ENST00000555661.1 | prostaglandin reductase 2                                                                   |
| KLHL29       | ENST00000486442.1 | kelch-like family member 29                                                                 |

|          |                   |                                                                                   |
|----------|-------------------|-----------------------------------------------------------------------------------|
| PLCXD3   | ENST00000377801.3 | phosphatidylinositol-specific phospholipase C, X domain containing 3              |
| PDE5A    | ENST00000354960.3 | phosphodiesterase 5A, cGMP-specific                                               |
| ADCY9    | ENST00000294016.3 | adenylate cyclase 9                                                               |
| RFX2     | ENST00000303657.5 | regulatory factor X, 2 (influences HLA class II expression)                       |
| RASSF8   | ENST00000541490.1 | Ras association (RalGDS/AF-6) domain family (N-terminal) member 8                 |
| UNC80    | ENST00000439458.1 | unc-80 homolog (C. elegans)                                                       |
| GOLGA1   | ENST00000373555.4 | golgin A1                                                                         |
| BNC2     | ENST00000380672.4 | basonuclin 2                                                                      |
| GJA9     | ENST00000454994.2 | gap junction protein, alpha 9, 59kDa                                              |
| CPT1A    | ENST00000265641.5 | carnitine palmitoyltransferase 1A (liver)                                         |
| NRAS     | ENST00000369535.4 | neuroblastoma RAS viral (v-ras) oncogene homolog                                  |
| ABI3BP   | ENST00000471714.1 | ABI family, member 3 (NESH) binding protein                                       |
| SLC2A14  | ENST00000340749.5 | solute carrier family 2 (facilitated glucose transporter), member 14              |
| ATP11C   | ENST00000327569.3 | ATPase, class VI, type 11C                                                        |
| MEF2A    | ENST00000354410.5 | myocyte enhancer factor 2A                                                        |
| CARD10   | ENST00000403299.1 | caspase recruitment domain family, member 10                                      |
| RFX3     | ENST00000382004.3 | regulatory factor X, 3 (influences HLA class II expression)                       |
| SLC35F3  | ENST00000366618.3 | solute carrier family 35, member F3                                               |
| ATP2A2   | ENST00000395494.2 | ATPase, Ca <sup>++</sup> transporting, cardiac muscle, slow twitch 2              |
| PACS2    | ENST00000447393.1 | phosphofurin acidic cluster sorting protein 2                                     |
| TADA2B   | ENST00000310074.7 | transcriptional adaptor 2B                                                        |
| SPAG9    | ENST00000262013.7 | sperm associated antigen 9                                                        |
| FGD4     | ENST00000427716.2 | FYVE, RhoGEF and PH domain containing 4                                           |
| NOL4     | ENST00000261592.5 | nucleolar protein 4                                                               |
| MEX3B    | ENST00000558133.1 | mex-3 RNA binding family member B                                                 |
| AFG3L2   | ENST00000269143.3 | AFG3 ATPase family member 3-like 2 (S. cerevisiae)                                |
| SLC25A53 | ENST00000357421.4 | solute carrier family 25, member 53                                               |
| PDIK1L   | ENST00000374271.4 | PDLIM1 interacting kinase 1 like                                                  |
| NRP1     | ENST00000374875.1 | neuropilin 1                                                                      |
| BAZ1A    | ENST00000358716.4 | bromodomain adjacent to zinc finger domain, 1A                                    |
| KCNJ10   | ENST00000368089.3 | potassium inwardly-rectifying channel, subfamily J, member 10                     |
| KREMEN1  | ENST00000400335.4 | kringle containing transmembrane protein 1                                        |
| SOCS4    | ENST00000395472.2 | suppressor of cytokine signaling 4                                                |
| STAU1    | ENST00000371828.3 | staufen double-stranded RNA binding protein 1                                     |
| TLK2     | ENST00000582809.1 | tousled-like kinase 2                                                             |
| PHF15    | ENST00000402835.1 | PHD finger protein 15                                                             |
| EPHA7    | ENST00000369303.4 | EPH receptor A7                                                                   |
| CDC27    | ENST00000066544.3 | cell division cycle 27                                                            |
| MTX3     | ENST00000509852.1 | metaxin 3                                                                         |
| CCDC92   | ENST00000238156.3 | coiled-coil domain containing 92                                                  |
| ACSL6    | ENST00000379264.2 | acyl-CoA synthetase long-chain family member 6                                    |
| SPTY2D1  | ENST00000336349.5 | SPT2, Suppressor of Ty, domain containing 1 (S. cerevisiae)                       |
| SCAI     | ENST00000336505.6 | suppressor of cancer cell invasion                                                |
| sep-03   | ENST00000396425.3 | septin 3                                                                          |
| MAB21L2  | ENST00000317605.4 | mab-21-like 2 (C. elegans)                                                        |
| RECK     | ENST00000377966.3 | reversion-inducing-cysteine-rich protein with kazal motifs                        |
| SYNE1    | ENST00000367255.5 | spectrin repeat containing, nuclear envelope 1                                    |
| ESR1     | ENST00000440973.1 | estrogen receptor 1                                                               |
| ZEB1     | ENST00000361642.5 | zinc finger E-box binding homeobox 1                                              |
| PEAK1    | ENST00000312493.4 | pseudopodium-enriched atypical kinase 1                                           |
| NR2C2    | ENST00000425241.1 | nuclear receptor subfamily 2, group C, member 2                                   |
| SUDS3    | ENST00000397564.2 | suppressor of defective silencing 3 homolog (S. cerevisiae)                       |
| CD2AP    | ENST00000359314.5 | CD2-associated protein                                                            |
| MME      | ENST00000460393.1 | membrane metallo-endopeptidase                                                    |
| GRM5     | ENST00000418177.2 | glutamate receptor, metabotropic 5                                                |
| HMX1     | ENST00000400677.3 | H6 family homeobox 1                                                              |
| EGR3     | ENST00000519492.1 | early growth response 3                                                           |
| SLC25A25 | ENST00000373069.5 | solute carrier family 25 (mitochondrial carrier; phosphate carrier), member 25    |
| AFAP1    | ENST00000360265.4 | actin filament associated protein 1                                               |
| SMG7     | ENST00000367537.3 | SMG7 nonsense mediated mRNA decay factor                                          |
| FSD1L    | ENST00000374710.3 | fibronectin type III and SPRY domain containing 1-like                            |
| FOXB1    | ENST00000396057.4 | forkhead box B1                                                                   |
| PARP2    | ENST00000527915.1 | poly (ADP-ribose) polymerase 2                                                    |
| EPB41L3  | ENST00000341928.2 | erythrocyte membrane protein band 4.1-like 3                                      |
| SLC9A6   | ENST00000370698.3 | solute carrier family 9, subfamily A (NHE6, cation proton antiporter 6), member 6 |
| FNBP4    | ENST00000263773.5 | formin binding protein 4                                                          |
| ELP4     | ENST00000395934.2 | elongator acetyltransferase complex subunit 4                                     |
| SMAD7    | ENST00000262158.2 | SMAD family member 7                                                              |
| RANBP3   | ENST00000439268.2 | RAN binding protein 3                                                             |
| ADAMTS18 | ENST00000282849.5 | ADAM metallopeptidase with thrombospondin type 1 motif, 18                        |
| PKD4     | ENST00000005178.5 | pyruvate dehydrogenase kinase, isozyme 4                                          |
| PJA2     | ENST00000361189.2 | praja ring finger 2, E3 ubiquitin protein ligase                                  |
| SLC8A1   | ENST00000406785.2 | solute carrier family 8 (sodium/calcium exchanger), member 1                      |
| LIN7C    | ENST00000278193.2 | lin-7 homolog C (C. elegans)                                                      |
| ZC3H6    | ENST00000343936.4 | zinc finger CCCH-type containing 6                                                |



|              |                   |                                                                                   |
|--------------|-------------------|-----------------------------------------------------------------------------------|
| ZMYND11      | ENST00000381591.1 | zinc finger, MYND-type containing 11                                              |
| DOCK10       | ENST00000409592.3 | dedicator of cytokinesis 10                                                       |
| KMT2A        | ENST00000534358.1 | lysine (K)-specific methyltransferase 2A                                          |
| ATP8A1       | ENST00000381668.5 | ATPase, aminophospholipid transporter (APLT), class I, type 8A, member 1          |
| PCSK1        | ENST00000311106.3 | proprotein convertase subtilisin/kexin type 1                                     |
| MBNL1        | ENST00000357472.3 | muscleblind-like splicing regulator 1                                             |
| FRYL         | ENST00000503238.1 | FRY-like                                                                          |
| CDX2         | ENST00000381020.7 | caudal type homeobox 2                                                            |
| MED12L       | ENST00000474524.1 | mediator complex subunit 12-like                                                  |
| GAD2         | ENST00000376261.3 | glutamate decarboxylase 2 (pancreatic islets and brain, 65kDa)                    |
| HNRNPH1      | ENST00000393432.4 | heterogeneous nuclear ribonucleoprotein H1 (H)                                    |
| RAB3IL1      | ENST00000394836.2 | RAB3A interacting protein (rabin3)-like 1                                         |
| GRM1         | ENST00000392299.2 | glutamate receptor, metabotropic 1                                                |
| PGM2L1       | ENST00000298198.4 | phosphoglucomutase 2-like 1                                                       |
| JAZF1        | ENST00000283928.5 | JAZF zinc finger 1                                                                |
| AVL9         | ENST00000318709.4 | AVL9 homolog (S. cerevisiae)                                                      |
| JARID2       | ENST00000341776.2 | jumonji, AT rich interactive domain 2                                             |
| NCOA2        | ENST00000452400.2 | nuclear receptor coactivator 2                                                    |
| HAPLN1       | ENST00000274341.4 | hyaluronan and proteoglycan link protein 1                                        |
| THAP1        | ENST00000345117.2 | THAP domain containing, apoptosis associated protein 1                            |
| NFAT5        | ENST00000354436.2 | nuclear factor of activated T-cells 5, tonicity-responsive                        |
| ADAMTSL1     | ENST00000380548.4 | ADAMTS-like 1                                                                     |
| NSMAF        | ENST0000038176.3  | neutral sphingomyelinase (N-SMase) activation associated factor                   |
| TMEM181      | ENST00000367090.3 | transmembrane protein 181                                                         |
| CDKL2        | ENST00000429927.2 | cyclin-dependent kinase-like 2 (CDC2-related kinase)                              |
| ATF2         | ENST00000487334.2 | activating transcription factor 2                                                 |
| TMEM47       | ENST00000275954.3 | transmembrane protein 47                                                          |
| CTC-432M15.3 | ENST00000514667.1 | Folliculin-interacting protein 1                                                  |
| PLXDC2       | ENST00000377252.4 | plexin domain containing 2                                                        |
| TMX3         | ENST00000299608.2 | thioredoxin-related transmembrane protein 3                                       |
| GIGYF1       | ENST00000275732.5 | GRB10 interacting GYF protein 1                                                   |
| BACH2        | ENST00000257749.4 | BTB and CNC homology 1, basic leucine zipper transcription factor 2               |
| GNG2         | ENST00000556752.1 | guanine nucleotide binding protein (G protein), gamma 2                           |
| CCP110       | ENST00000381396.5 | centriolar coiled coil protein 110kDa                                             |
| ESD          | ENST00000378720.3 | esterase D                                                                        |
| RGMA         | ENST00000557420.1 | RGM domain family, member A                                                       |
| TGFBR3       | ENST00000212355.4 | transforming growth factor, beta receptor III                                     |
| LRP4         | ENST00000378623.1 | low density lipoprotein receptor-related protein 4                                |
| RALBP1       | ENST00000383432.3 | ralA binding protein 1                                                            |
| ABTB2        | ENST00000435224.2 | ankyrin repeat and BTB (POZ) domain containing 2                                  |
| HTR2C        | ENST00000371950.3 | 5-hydroxytryptamine (serotonin) receptor 2C, G protein-coupled                    |
| RBM26        | ENST00000267229.7 | RNA binding motif protein 26                                                      |
| DIP2C        | ENST00000280886.6 | DIP2 disco-interacting protein 2 homolog C (Drosophila)                           |
| HIPK1        | ENST00000369558.1 | homeodomain interacting protein kinase 1                                          |
| DLG2         | ENST00000398309.2 | discs, large homolog 2 (Drosophila)                                               |
| PHACTR2      | ENST00000427704.2 | phosphatase and actin regulator 2                                                 |
| TMEM71       | ENST00000356838.3 | transmembrane protein 71                                                          |
| ANKRD50      | ENST00000504087.1 | ankyrin repeat domain 50                                                          |
| PGR          | ENST00000325455.5 | progesterone receptor                                                             |
| BRAP         | ENST00000419234.4 | BRCA1 associated protein                                                          |
| SNX30        | ENST00000374232.3 | sorting nexin family member 30                                                    |
| ENPP1        | ENST00000360971.2 | ectonucleotide pyrophosphatase/phosphodiesterase 1                                |
| NDRG2        | ENST00000298687.5 | NDRG family member 2                                                              |
| TSFM         | ENST00000540550.1 | Ts translation elongation factor, mitochondrial                                   |
| PAFAH1B1     | ENST00000397195.5 | platelet-activating factor acetylhydrolase 1b, regulatory subunit 1 (45kDa)       |
| UBE2J1       | ENST00000435041.2 | ubiquitin-conjugating enzyme E2, J1                                               |
| FMR1         | ENST00000370471.3 | fragile X mental retardation 1                                                    |
| SLC30A1      | ENST00000367001.4 | solute carrier family 30 (zinc transporter), member 1                             |
| CHMP3        | ENST00000263856.4 | charged multivesicular body protein 3                                             |
| HOMER1       | ENST00000508576.1 | homer homolog 1 (Drosophila)                                                      |
| FBXO45       | ENST00000311630.6 | F-box protein 45                                                                  |
| INO80        | ENST00000361937.3 | INO80 complex subunit                                                             |
| SLC9A8       | ENST00000361573.2 | solute carrier family 9, subfamily A (NHE8, cation proton antiporter 8), member 8 |
| ARRDC3       | ENST00000265138.3 | arrestin domain containing 3                                                      |
| INPP5A       | ENST00000368594.3 | inositol polyphosphate-5-phosphatase, 40kDa                                       |
| SFMBT1       | ENST00000394752.3 | Scm-like with four mbt domains 1                                                  |
| KIAA1324L    | ENST00000450689.2 | KIAA1324-like                                                                     |
| CHD7         | ENST00000423902.2 | chromodomain helicase DNA binding protein 7                                       |
| DCLK1        | ENST00000379892.4 | doublecortin-like kinase 1                                                        |
| FAM216B      | ENST00000537894.1 | family with sequence similarity 216, member B                                     |
| TMEM127      | ENST00000258439.3 | transmembrane protein 127                                                         |
| RNF103-CHMP3 | ENST00000604011.1 | RNF103-CHMP3 readthrough                                                          |
| GMFB         | ENST00000554908.1 | glia maturation factor, beta                                                      |
| TIAL1        | ENST00000369093.2 | TIA1 cytotoxic granule-associated RNA binding protein-like 1                      |
| SGTB         | ENST00000381007.4 | small glutamine-rich tetratricopeptide repeat (TPR)-containing, beta              |

|          |                   |                                                                                                                  |
|----------|-------------------|------------------------------------------------------------------------------------------------------------------|
| HIC2     | ENST00000407464.2 | hypermethylated in cancer 2                                                                                      |
| PPP1R3B  | ENST00000310455.3 | protein phosphatase 1, regulatory subunit 3B                                                                     |
| CLCC1    | ENST00000356970.2 | chloride channel CLIC-like 1                                                                                     |
| SIX4     | ENST00000216513.4 | SIX homeobox 4                                                                                                   |
| RTKN2    | ENST00000373789.3 | rhotekin 2                                                                                                       |
| FAM102A  | ENST00000373095.1 | family with sequence similarity 102, member A                                                                    |
| LPPR4    | ENST00000370185.3 | Lipid phosphate phosphatase-related protein type 4                                                               |
| HS2ST1   | ENST00000370550.5 | heparan sulfate 2-O-sulfotransferase 1                                                                           |
| SRGAP1   | ENST00000355086.3 | SLIT-ROBO Rho GTPase activating protein 1                                                                        |
| RPS6KA3  | ENST00000379565.3 | ribosomal protein S6 kinase, 90kDa, polypeptide 3                                                                |
| DDX3X    | ENST00000399959.2 | DEAD (Asp-Glu-Ala-Asp) box helicase 3, X-linked                                                                  |
| KDM5A    | ENST00000399788.2 | lysine (K)-specific demethylase 5A                                                                               |
| MSI1     | ENST00000257552.2 | musashi RNA-binding protein 1                                                                                    |
| FAM49A   | ENST00000381323.3 | family with sequence similarity 49, member A                                                                     |
| PPP2R2C  | ENST00000335585.5 | protein phosphatase 2, regulatory subunit B, gamma                                                               |
| CNOT6L   | ENST00000504123.1 | CCR4-NOT transcription complex, subunit 6-like                                                                   |
| AP1G1    | ENST00000299980.4 | adaptor-related protein complex 1, gamma 1 subunit                                                               |
| ILF3     | ENST00000449870.1 | interleukin enhancer binding factor 3, 90kDa                                                                     |
| DNAJC3   | ENST00000602402.1 | DnaJ (Hsp40) homolog, subfamily C, member 3                                                                      |
| MFSD6    | ENST00000392328.1 | major facilitator superfamily domain containing 6                                                                |
| CDC42BPA | ENST00000366767.3 | CDC42 binding protein kinase alpha (DMPK-like)                                                                   |
| TBC1D9   | ENST00000442267.2 | TBC1 domain family, member 9 (with GRAM domain)                                                                  |
| FSTL1    | ENST00000295633.3 | folliculin-like 1                                                                                                |
| KCNK12   | ENST00000327876.4 | potassium channel, subfamily K, member 12                                                                        |
| FAM179B  | ENST00000382233.2 | family with sequence similarity 179, member B                                                                    |
| LCOR     | ENST00000371103.3 | ligand dependent nuclear receptor corepressor                                                                    |
| FBXO48   | ENST00000377957.3 | F-box protein 48                                                                                                 |
| TBC1D14  | ENST00000448507.1 | TBC1 domain family, member 14                                                                                    |
| NSG1     | ENST00000421177.2 | Neuron-specific protein family member 1                                                                          |
| MSL2     | ENST00000309993.2 | male-specific lethal 2 homolog (Drosophila)                                                                      |
| SRSF10   | ENST00000343255.5 | serine/arginine-rich splicing factor 10                                                                          |
| DGCR2    | ENST00000545799.1 | DiGeorge syndrome critical region gene 2                                                                         |
| ANXA11   | ENST00000372231.3 | annexin A11                                                                                                      |
| CNOT1    | ENST00000317147.5 | CCR4-NOT transcription complex, subunit 1                                                                        |
| TBX18    | ENST00000369663.5 | T-box 18                                                                                                         |
| NR1D2    | ENST00000312521.4 | nuclear receptor subfamily 1, group D, member 2                                                                  |
| IPMK     | ENST00000373935.3 | inositol polyphosphate multikinase                                                                               |
| MAPT     | ENST00000344290.5 | microtubule-associated protein tau                                                                               |
| LUZP1    | ENST00000418342.1 | leucine zipper protein 1                                                                                         |
| STRN     | ENST00000263918.4 | striatin, calmodulin binding protein                                                                             |
| MEGF9    | ENST00000373930.3 | multiple EGF-like-domains 9                                                                                      |
| FRS2     | ENST00000550389.1 | fibroblast growth factor receptor substrate 2                                                                    |
| ZSCAN12  | ENST00000361028.1 | zinc finger and SCAN domain containing 12                                                                        |
| ZNRF2    | ENST00000323037.4 | zinc and ring finger 2                                                                                           |
| ZBTB4    | ENST00000380599.4 | zinc finger and BTB domain containing 4                                                                          |
| MTMR12   | ENST00000280285.5 | myotubularin related protein 12                                                                                  |
| RNF43    | ENST00000407977.2 | ring finger protein 43                                                                                           |
| PHLPP2   | ENST00000568954.1 | PH domain and leucine rich repeat protein phosphatase 2                                                          |
| KRT222   | ENST00000394052.3 | keratin 222                                                                                                      |
| NKX3-2   | ENST00000382438.5 | NK3 homeobox 2                                                                                                   |
| TNRC6B   | ENST00000335727.9 | trinucleotide repeat containing 6B                                                                               |
| MCC      | ENST00000302475.4 | mutated in colorectal cancers                                                                                    |
| GCC2     | ENST00000309863.6 | GRIP and coiled-coil domain containing 2                                                                         |
| VKORC1L1 | ENST00000360768.3 | vitamin K epoxide reductase complex, subunit 1-like 1                                                            |
| SRSF5    | ENST00000553521.1 | serine/arginine-rich splicing factor 5                                                                           |
| USP6NL   | ENST00000609104.1 | USP6 N-terminal like                                                                                             |
| L1CAM    | ENST00000370060.1 | L1 cell adhesion molecule                                                                                        |
| LPCAT1   | ENST00000283415.3 | lysophosphatidylcholine acyltransferase 1                                                                        |
| CUL5     | ENST00000393094.2 | cullin 5                                                                                                         |
| ZNF394   | ENST00000426306.2 | zinc finger protein 394                                                                                          |
| SVIP     | ENST00000354193.4 | small VCP/p97-interacting protein                                                                                |
| YIPF6    | ENST00000462683.1 | Yip1 domain family, member 6                                                                                     |
| PPP6C    | ENST00000373547.4 | protein phosphatase 6, catalytic subunit                                                                         |
| RASAL2   | ENST00000448150.3 | RAS protein activator like 2                                                                                     |
| ACTRT3   | ENST00000330368.2 | actin-related protein T3                                                                                         |
| UBR2     | ENST00000372883.3 | ubiquitin protein ligase E3 component n-recognin 2                                                               |
| TRIM3    | ENST00000525074.1 | tripartite motif containing 3                                                                                    |
| CELSR3   | ENST00000164024.4 | cadherin, EGF LAG seven-pass G-type receptor 3                                                                   |
| RNF152   | ENST00000312828.3 | ring finger protein 152                                                                                          |
| SEMA4C   | ENST00000305476.5 | sema domain, immunoglobulin domain (Ig), transmembrane domain (TM) and short cytoplasmic domain, (semaphorin) 4C |
| CORO1C   | ENST00000261401.3 | coronin, actin binding protein, 1C                                                                               |
| PRDM1    | ENST00000369089.3 | PR domain containing 1, with ZNF domain                                                                          |
| STXBP6   | ENST00000396700.1 | syntaxin binding protein 6 (amisyn)                                                                              |
| ADARB2   | ENST00000381312.1 | adenosine deaminase, RNA-specific, B2 (non-functional)                                                           |
| TAF9B    | ENST00000341864.5 | TAF9B RNA polymerase II, TATA box binding protein (TBP)-associated factor, 31kDa                                 |

|               |                   |                                                                                           |
|---------------|-------------------|-------------------------------------------------------------------------------------------|
| GUCY1A2       | ENST00000526355.2 | guanylate cyclase 1, soluble, alpha 2                                                     |
| FNDC3A        | ENST00000492622.2 | fibronectin type III domain containing 3A                                                 |
| GCNT4         | ENST00000322348.4 | glucosaminyl (N-acetyl) transferase 4, core 2                                             |
| GATC          | ENST00000551765.1 | glutamyl-tRNA(Gln) amidotransferase, subunit C                                            |
| ZFX           | ENST00000539115.1 | zinc finger protein, X-linked                                                             |
| ITGA6         | ENST00000375221.2 | integrin, alpha 6                                                                         |
| GALNT16       | ENST00000337827.4 | UDP-N-acetyl-alpha-D-galactosamine:polypeptide N-acetylgalactosaminyltransferase 16       |
| KIAA1551      | ENST00000312561.4 | KIAA1551                                                                                  |
| DIXDC1        | ENST00000440460.2 | DIX domain containing 1                                                                   |
| NUCKS1        | ENST00000367142.4 | nuclear casein kinase and cyclin-dependent kinase substrate 1                             |
| EXO1          | ENST00000518483.1 | exonuclease 1                                                                             |
| KIAA1549L     | ENST00000321505.4 | KIAA1549-like                                                                             |
| MAP4K4        | ENST00000413150.2 | mitogen-activated protein kinase kinase kinase 4                                          |
| TTC39B        | ENST00000512701.2 | tetratricopeptide repeat domain 39B                                                       |
| ALO21546.6    | ENST00000551806.1 | Glutamyl-tRNA(Gln) amidotransferase subunit C, mitochondrial                              |
| FNDC3B        | ENST00000336824.4 | fibronectin type III domain containing 3B                                                 |
| SUGT1         | ENST00000310528.8 | SGT1, suppressor of G2 allele of SKP1 (S. cerevisiae)                                     |
| CSNK1A1       | ENST00000261798.5 | casein kinase 1, alpha 1                                                                  |
| ARF3          | ENST00000256682.4 | ADP-ribosylation factor 3                                                                 |
| PSAP          | ENST00000394936.3 | prosaposin                                                                                |
| YTHDF3        | ENST00000539294.1 | YTH domain family, member 3                                                               |
| CTNND1        | ENST00000524630.1 | catenin (cadherin-associated protein), delta 1                                            |
| RALGAPA2      | ENST00000202677.7 | Ral GTPase activating protein, alpha subunit 2 (catalytic)                                |
| ATG2B         | ENST00000359933.4 | autophagy related 2B                                                                      |
| NBEA          | ENST00000379939.2 | neurobeachin                                                                              |
| ZNF292        | ENST00000369577.3 | zinc finger protein 292                                                                   |
| GFPT1         | ENST00000357308.4 | glutamine--fructose-6-phosphate transaminase 1                                            |
| SLC25A12      | ENST00000422440.2 | solute carrier family 25 (aspartate/glutamate carrier), member 12                         |
| CDS2          | ENST00000460006.1 | CDP-diacylglycerol synthase (phosphatidate cytidyltransferase) 2                          |
| IGDCC3        | ENST00000327987.4 | immunoglobulin superfamily, DCC subclass, member 3                                        |
| THRA          | ENST00000450525.2 | thyroid hormone receptor, alpha                                                           |
| FAM46C        | ENST00000369448.3 | family with sequence similarity 46, member C                                              |
| RP11-644F5.10 | ENST00000550412.1 | Uncharacterized protein                                                                   |
| NOTCH2        | ENST00000256646.2 | notch 2                                                                                   |
| CHCHD4        | ENST00000295767.5 | coiled-coil-helix-coiled-coil-helix domain containing 4                                   |
| LPGAT1        | ENST00000366997.4 | lysophosphatidylglycerol acyltransferase 1                                                |
| BRWD1         | ENST00000342449.3 | bromodomain and WD repeat domain containing 1                                             |
| CSNK1G1       | ENST00000303052.7 | casein kinase 1, gamma 1                                                                  |
| PPP1R12B      | ENST00000608999.1 | protein phosphatase 1, regulatory subunit 12B                                             |
| CAMSAP1       | ENST00000389532.4 | calmodulin regulated spectrin-associated protein 1                                        |
| KCNN3         | ENST00000271915.4 | potassium intermediate/small conductance calcium-activated channel, subfamily N, member 3 |
| ASTN1         | ENST00000361833.2 | astrotactin 1                                                                             |
| NME1          | ENST00000511355.1 | NME/NM23 nucleoside diphosphate kinase 1                                                  |
| ANKRD52       | ENST00000267116.7 | ankyrin repeat domain 52                                                                  |
| SYT3          | ENST00000338916.4 | synaptotagmin III                                                                         |
| BEND4         | ENST00000504360.1 | BEN domain containing 4                                                                   |
| MCUR1         | ENST00000379170.4 | mitochondrial calcium uniporter regulator 1                                               |
| FAXC          | ENST00000389677.5 | failed axon connections homolog (Drosophila)                                              |
| SALL3         | ENST00000575389.2 | sal-like 3 (Drosophila)                                                                   |
| KCTD16        | ENST00000507359.3 | potassium channel tetramerization domain containing 16                                    |
| EXOSC2        | ENST00000372358.5 | exosome component 2                                                                       |
| ASXL2         | ENST00000435504.4 | additional sex combs like 2 (Drosophila)                                                  |
| ZFHX4         | ENST00000521891.2 | zinc finger homeobox 4                                                                    |
| SAMD4A        | ENST00000392067.3 | sterile alpha motif domain containing 4A                                                  |
| CSRNP3        | ENST00000314499.7 | cysteine-serine-rich nuclear protein 3                                                    |
| ATM           | ENST00000452508.2 | ataxia telangiectasia mutated                                                             |
| CECR2         | ENST00000400573.5 | cat eye syndrome chromosome region, candidate 2                                           |
| KPNA1         | ENST00000344337.6 | karyopherin alpha 1 (importin alpha 5)                                                    |
| SOX6          | ENST00000316399.6 | SRY (sex determining region Y)-box 6                                                      |
| RUNX1         | ENST00000344691.4 | runt-related transcription factor 1                                                       |
| CNTNAP2       | ENST00000361727.3 | contactin associated protein-like 2                                                       |
| ROBO2         | ENST00000461745.1 | roundabout, axon guidance receptor, homolog 2 (Drosophila)                                |
| NKAP          | ENST00000371410.3 | NFKB activating protein                                                                   |
| GAPVD1        | ENST00000470056.1 | GTPase activating protein and VPS9 domains 1                                              |
| ATRN1         | ENST00000355044.3 | attractin-like 1                                                                          |
| CHD9          | ENST00000566029.1 | chromodomain helicase DNA binding protein 9                                               |
| SLC25A36      | ENST00000446041.2 | solute carrier family 25 (pyrimidine nucleotide carrier ), member 36                      |
| ATP11A        | ENST00000487903.1 | ATPase, class VI, type 11A                                                                |
| THBS2         | ENST00000366787.3 | thrombospondin 2                                                                          |
| ISPD          | ENST00000407010.2 | isoprenoid synthase domain containing                                                     |
| MTF1          | ENST00000373036.4 | metal-regulatory transcription factor 1                                                   |
| KIAA0226      | ENST00000273582.5 | KIAA0226                                                                                  |
| RNF217        | ENST00000521654.2 | ring finger protein 217                                                                   |
| FOXK1         | ENST00000328914.4 | forkhead box K1                                                                           |
| UBA6          | ENST00000322244.5 | ubiquitin-like modifier activating enzyme 6                                               |

|           |                   |                                                                                             |
|-----------|-------------------|---------------------------------------------------------------------------------------------|
| C1orf50   | ENST00000372525.5 | chromosome 1 open reading frame 50                                                          |
| TBC1D24   | ENST00000567020.1 | TBC1 domain family, member 24                                                               |
| PROSER1   | ENST00000352251.3 | proline and serine rich 1                                                                   |
| SCML2     | ENST00000398048.3 | sex comb on midleg-like 2 (Drosophila)                                                      |
| NEURL1B   | ENST00000369800.5 | neutralized homolog 1B (Drosophila)                                                         |
| PPP1R3E   | ENST00000452015.4 | protein phosphatase 1, regulatory subunit 3E                                                |
| PHC3      | ENST00000495893.2 | polyhomeotic homolog 3 (Drosophila)                                                         |
| ADAMTS1   | ENST00000284984.3 | ADAM metalloproteinase with thrombospondin type 1 motif, 1                                  |
| CCDC85A   | ENST00000407595.2 | coiled-coil domain containing 85A                                                           |
| SYPL2     | ENST00000369872.3 | synaptophysin-like 2                                                                        |
| GPR180    | ENST00000376958.4 | G protein-coupled receptor 180                                                              |
| NACC2     | ENST00000371753.1 | NACC family member 2, BEN and BTB (POZ) domain containing                                   |
| FAM126B   | ENST00000418596.3 | family with sequence similarity 126, member B                                               |
| CAMTA2    | ENST00000358183.4 | calmodulin binding transcription activator 2                                                |
| SP1       | ENST00000426431.2 | Sp1 transcription factor                                                                    |
| ARIH1     | ENST00000379887.4 | ariadne RBR E3 ubiquitin protein ligase 1                                                   |
| CCDC6     | ENST00000263102.6 | coiled-coil domain containing 6                                                             |
| PRRC2C    | ENST00000367742.3 | proline-rich coiled-coil 2C                                                                 |
| NUFIP2    | ENST00000225388.4 | nuclear fragile X mental retardation protein interacting protein 2                          |
| TNIK      | ENST00000436636.2 | TRAF2 and NCK interacting kinase                                                            |
| PIK3C2A   | ENST00000265970.7 | phosphatidylinositol-4-phosphate 3-kinase, catalytic subunit type 2 alpha                   |
| FBXO11    | ENST00000402508.1 | F-box protein 11                                                                            |
| PTPN9     | ENST00000306726.2 | protein tyrosine phosphatase, non-receptor type 9                                           |
| CLMN      | ENST00000298912.4 | calmin (calponin-like, transmembrane)                                                       |
| CSNK1G3   | ENST00000360683.2 | casein kinase 1, gamma 3                                                                    |
| ETV6      | ENST00000396373.4 | ets variant 6                                                                               |
| PPARA     | ENST00000396000.2 | peroxisome proliferator-activated receptor alpha                                            |
| CBX5      | ENST00000209875.4 | chromobox homolog 5                                                                         |
| APBA1     | ENST00000265381.4 | amyloid beta (A4) precursor protein-binding, family A, member 1                             |
| XYLT1     | ENST00000261381.6 | xylosyltransferase I                                                                        |
| HECW2     | ENST00000260983.3 | HECT, C2 and WW domain containing E3 ubiquitin protein ligase 2                             |
| WSCD2     | ENST00000332082.4 | WSC domain containing 2                                                                     |
| TNS1      | ENST00000171887.4 | tenascin 1                                                                                  |
| EPB41     | ENST00000373798.1 | erythrocyte membrane protein band 4.1 (elliptocytosis 1, RH-linked)                         |
| CLOCK     | ENST00000309964.4 | clock circadian regulator                                                                   |
| NMNAT2    | ENST00000294868.4 | nicotinamide nucleotide adenyltransferase 2                                                 |
| TRERF1    | ENST00000541110.1 | transcriptional regulating factor 1                                                         |
| ERMN      | ENST00000410096.1 | ermin, ERM-like protein                                                                     |
| HYOU1     | ENST00000404233.3 | hypoxia up-regulated 1                                                                      |
| HLTF      | ENST00000465259.1 | helicase-like transcription factor                                                          |
| TRRAP     | ENST00000359863.4 | transformation/transcription domain-associated protein                                      |
| KIAA2018  | ENST00000316407.4 | KIAA2018                                                                                    |
| MINK1     | ENST00000347992.7 | misshapen-like kinase 1                                                                     |
| ANK1      | ENST00000289734.7 | ankyrin 1, erythrocytic                                                                     |
| SLITRK4   | ENST00000381779.4 | SLIT and NTRK-like family, member 4                                                         |
| CMPK2     | ENST00000256722.5 | cytidine monophosphate (UMP-CMP) kinase 2, mitochondrial                                    |
| FBXO41    | ENST00000295133.5 | F-box protein 41                                                                            |
| SLX4      | ENST00000294008.3 | SLX4 structure-specific endonuclease subunit                                                |
| PSD3      | ENST00000327040.8 | pleckstrin and Sec7 domain containing 3                                                     |
| TMEM135   | ENST00000340353.7 | transmembrane protein 135                                                                   |
| RAB11FIP2 | ENST00000355624.3 | RAB11 family interacting protein 2 (class I)                                                |
| ZBTB41    | ENST00000367405.4 | zinc finger and BTB domain containing 41                                                    |
| PDE3A     | ENST00000359062.3 | phosphodiesterase 3A, cGMP-inhibited                                                        |
| QSER1     | ENST00000399302.2 | glutamine and serine rich 1                                                                 |
| RAB3GAP2  | ENST00000358951.2 | RAB3 GTPase activating protein subunit 2 (non-catalytic)                                    |
| PPP2R5E   | ENST00000337537.3 | protein phosphatase 2, regulatory subunit B', epsilon isoform                               |
| HDAC9     | ENST00000405010.3 | histone deacetylase 9                                                                       |
| SRGAP2    | ENST00000414007.1 | SLIT-ROBO Rho GTPase activating protein 2                                                   |
| CAND1     | ENST00000545606.1 | cullin-associated and neddylation-dissociated 1                                             |
| CNKSR2    | ENST00000379510.3 | connector enhancer of kinase suppressor of Ras 2                                            |
| TULP4     | ENST00000367094.2 | tubby like protein 4                                                                        |
| TANC2     | ENST00000424789.2 | tetratricopeptide repeat, ankyrin repeat and coiled-coil containing 2                       |
| IL6ST     | ENST00000381287.4 | interleukin 6 signal transducer (gp130, oncostatin M receptor)                              |
| CEP350    | ENST00000367607.3 | centrosomal protein 350kDa                                                                  |
| BMPR2     | ENST00000374574.2 | bone morphogenetic protein receptor, type II (serine/threonine kinase)                      |
| ACAN      | ENST00000439576.2 | aggrecan                                                                                    |
| MAP1A     | ENST00000382031.1 | microtubule-associated protein 1A                                                           |
| WDFY3     | ENST00000322366.6 | WD repeat and FYVE domain containing 3                                                      |
| CLUH      | ENST00000570628.2 | clustered mitochondria (cluA/CLU1) homolog                                                  |
| STXBP5    | ENST00000367481.3 | syntaxis binding protein 5 (tomosyn)                                                        |
| KCTD10    | ENST00000228495.6 | potassium channel tetramerization domain containing 10                                      |
| SLC7A11   | ENST00000280612.5 | solute carrier family 7 (anionic amino acid transporter light chain, xc- system), member 11 |
| ZNF280B   | ENST00000360412.2 | zinc finger protein 280B                                                                    |
| OSBPL8    | ENST00000393249.2 | oxysterol binding protein-like 8                                                            |
| WDR37     | ENST00000358220.1 | WD repeat domain 37                                                                         |

|          |                    |                                                                                                                  |
|----------|--------------------|------------------------------------------------------------------------------------------------------------------|
| PI4K2A   | ENST00000370649.3  | Phosphatidylinositol 4-kinase type 2-alpha; Uncharacterized protein                                              |
| MAP3K9   | ENST00000554752.2  | mitogen-activated protein kinase kinase kinase 9                                                                 |
| EPC1     | ENST00000319778.6  | enhancer of polycomb homolog 1 (Drosophila)                                                                      |
| CBFA2T2  | ENST00000375279.2  | core-binding factor, runt domain, alpha subunit 2; translocated to, 2                                            |
| GLIS3    | ENST00000324333.10 | GLIS family zinc finger 3                                                                                        |
| LRP6     | ENST00000261349.4  | low density lipoprotein receptor-related protein 6                                                               |
| CACNA2D2 | ENST00000423994.2  | calcium channel, voltage-dependent, alpha 2/delta subunit 2                                                      |
| LOX      | ENST00000231004.4  | lysyl oxidase                                                                                                    |
| KCNJ15   | ENST00000328656.4  | potassium inwardly-rectifying channel, subfamily J, member 15                                                    |
| CHD1     | ENST00000284049.3  | chromodomain helicase DNA binding protein 1                                                                      |
| SBNO1    | ENST00000420886.2  | strawberry notch homolog 1 (Drosophila)                                                                          |
| TMEM242  | ENST00000400788.4  | transmembrane protein 242                                                                                        |
| ONECUT3  | ENST00000382349.4  | one cut homeobox 3                                                                                               |
| BPTF     | ENST00000321892.4  | bromodomain PHD finger transcription factor                                                                      |
| DPP6     | ENST00000404039.1  | dipeptidyl-peptidase 6                                                                                           |
| MKNK2    | ENST00000591601.1  | MAP kinase interacting serine/threonine kinase 2                                                                 |
| MMP14    | ENST00000311852.6  | matrix metalloproteinase 14 (membrane-inserted)                                                                  |
| BAAT     | ENST00000259407.2  | bile acid CoA: amino acid N-acyltransferase (glycine N-choloyltransferase)                                       |
| KCNK10   | ENST00000340700.5  | potassium channel, subfamily K, member 10                                                                        |
| SRCIN1   | ENST00000264659.7  | SRC kinase signaling inhibitor 1                                                                                 |
| CKAP4    | ENST00000378026.4  | cytoskeleton-associated protein 4                                                                                |
| AFF1     | ENST00000395146.4  | AF4/FMR2 family, member 1                                                                                        |
| SESN3    | ENST00000536441.1  | sestrin 3                                                                                                        |
| TAF4     | ENST00000252996.4  | TAF4 RNA polymerase II, TATA box binding protein (TBP)-associated factor, 135kDa                                 |
| BAZ2A    | ENST00000379441.3  | bromodomain adjacent to zinc finger domain, 2A                                                                   |
| STAT3    | ENST00000585517.1  | signal transducer and activator of transcription 3 (acute-phase response factor)                                 |
| UNKL     | ENST00000389221.4  | unkempt homolog (Drosophila)-like                                                                                |
| LIMCH1   | ENST00000313860.7  | LIM and calponin homology domains 1                                                                              |
| FAF1     | ENST00000396153.2  | Fas (TNFRSF6) associated factor 1                                                                                |
| MCL1     | ENST00000369026.2  | myeloid cell leukemia sequence 1 (BCL2-related)                                                                  |
| RNF8     | ENST00000373479.4  | ring finger protein 8, E3 ubiquitin protein ligase                                                               |
| KLHL15   | ENST00000328046.8  | kelch-like family member 15                                                                                      |
| NLK      | ENST00000407008.3  | nemo-like kinase                                                                                                 |
| GRID1    | ENST00000327946.7  | glutamate receptor, ionotropic, delta 1                                                                          |
| ZFX3     | ENST00000268489.5  | zinc finger homeobox 3                                                                                           |
| WNK3     | ENST00000375169.3  | WNK lysine deficient protein kinase 3                                                                            |
| PRPF40A  | ENST00000410080.1  | PRP40 pre-mRNA processing factor 40 homolog A (S. cerevisiae)                                                    |
| B3GNT4   | ENST00000546192.1  | UDP-GlcNAc:betaGal beta-1,3-N-acetylglucosaminyltransferase 4                                                    |
| CPSF6    | ENST00000435070.2  | cleavage and polyadenylation specific factor 6, 68kDa                                                            |
| sep-08   | ENST00000378706.1  | septin 8                                                                                                         |
| UBE3C    | ENST00000348165.5  | ubiquitin protein ligase E3C                                                                                     |
| SECISBP2 | ENST00000375807.3  | SECIS binding protein 2                                                                                          |
| TUBB     | ENST00000327892.8  | tubulin, beta class I                                                                                            |
| OGT      | ENST00000373719.3  | O-linked N-acetylglucosamine (GlcNAc) transferase                                                                |
| SOX5     | ENST00000546136.1  | SRY (sex determining region Y)-box 5                                                                             |
| SLIT1    | ENST00000371070.4  | slit homolog 1 (Drosophila)                                                                                      |
| ATL3     | ENST00000398868.3  | atlastin GTPase 3                                                                                                |
| C14orf28 | ENST00000325192.3  | chromosome 14 open reading frame 28                                                                              |
| ADARB1   | ENST00000539173.1  | adenosine deaminase, RNA-specific, B1                                                                            |
| TRPV3    | ENST00000301365.4  | transient receptor potential cation channel, subfamily V, member 3                                               |
| USP47    | ENST00000339865.5  | ubiquitin specific peptidase 47                                                                                  |
| DNAL1    | ENST00000553645.2  | dynein, axonemal, light chain 1                                                                                  |
| KCMF1    | ENST00000409785.4  | potassium channel modulatory factor 1                                                                            |
| UBE2D3   | ENST00000453744.2  | ubiquitin-conjugating enzyme E2D 3                                                                               |
| GABRQ    | ENST00000370306.2  | gamma-aminobutyric acid (GABA) A receptor, theta                                                                 |
| DYRK2    | ENST00000344096.3  | dual-specificity tyrosine-(Y)-phosphorylation regulated kinase 2                                                 |
| SEMA4F   | ENST00000357877.2  | sema domain, immunoglobulin domain (Ig), transmembrane domain (TM) and short cytoplasmic domain, (semaphorin) 4F |
| COL5A1   | ENST00000371817.3  | collagen, type V, alpha 1                                                                                        |
| VGLL4    | ENST00000273038.3  | vestigial like 4 (Drosophila)                                                                                    |
| CBX8     | ENST00000269385.4  | chromobox homolog 8                                                                                              |
| SIK3     | ENST00000375300.1  | SIK family kinase 3                                                                                              |
| COPS2    | ENST00000388901.5  | COP9 signalosome subunit 2                                                                                       |
| PNRC1    | ENST00000336032.3  | proline-rich nuclear receptor coactivator 1                                                                      |
| FOXP2    | ENST00000408937.3  | forkhead box P2                                                                                                  |
| UBE2N    | ENST00000550657.1  | ubiquitin-conjugating enzyme E2N                                                                                 |
| CASP10   | ENST00000360132.3  | caspase 10, apoptosis-related cysteine peptidase                                                                 |
| CENPO    | ENST00000380834.2  | centromere protein O                                                                                             |
| MLXIP    | ENST00000319080.7  | MLX interacting protein                                                                                          |
| USP9X    | ENST00000324545.8  | ubiquitin specific peptidase 9, X-linked                                                                         |
| SIPA1L1  | ENST00000555818.1  | signal-induced proliferation-associated 1 like 1                                                                 |
| HAUS3    | ENST00000243706.4  | HAUS augmin-like complex, subunit 3                                                                              |
| RALGAPB  | ENST00000397038.1  | Ral GTPase activating protein, beta subunit (non-catalytic)                                                      |
| GAS7     | ENST00000437099.2  | growth arrest-specific 7                                                                                         |
| PAQR3    | ENST00000512733.1  | progesterone and adipoQ receptor family member III                                                               |
| MECP2    | ENST00000303391.6  | methyl CpG binding protein 2 (Rett syndrome)                                                                     |

|          |                   |                                                                                          |
|----------|-------------------|------------------------------------------------------------------------------------------|
| UBE2T    | ENST00000367274.4 | ubiquitin-conjugating enzyme E2T (putative)                                              |
| TDRD6    | ENST00000544460.1 | tudor domain containing 6                                                                |
| MAPRE2   | ENST00000436190.2 | microtubule-associated protein, RP/EB family, member 2                                   |
| SLC35G1  | ENST00000371408.3 | solute carrier family 35, member G1                                                      |
| DNAJC5   | ENST00000360864.4 | DnaJ (Hsp40) homolog, subfamily C, member 5                                              |
| SMAD2    | ENST00000262160.6 | SMAD family member 2                                                                     |
| TFAM     | ENST00000487519.1 | transcription factor A, mitochondrial                                                    |
| SRSF11   | ENST00000370950.3 | serine/arginine-rich splicing factor 11                                                  |
| NUDT21   | ENST00000300291.5 | nudix (nucleoside diphosphate linked moiety X)-type motif 21                             |
| NAA20    | ENST00000310450.4 | N(alpha)-acetyltransferase 20, NatB catalytic subunit                                    |
| VANGL1   | ENST00000355485.2 | VANGL planar cell polarity protein 1                                                     |
| ZNF652   | ENST00000362063.2 | zinc finger protein 652                                                                  |
| RCN2     | ENST00000394885.3 | reticulocalbin 2, EF-hand calcium binding domain                                         |
| ARL3     | ENST00000260746.5 | ADP-ribosylation factor-like 3                                                           |
| TRIM13   | ENST00000378182.3 | tripartite motif containing 13                                                           |
| HTT      | ENST00000355072.5 | huntingtin                                                                               |
| HNRNPA0  | ENST00000314940.4 | heterogeneous nuclear ribonucleoprotein A0                                               |
| IARS2    | ENST00000366922.1 | isoleucyl-tRNA synthetase 2, mitochondrial                                               |
| PIP4K2B  | ENST00000269554.3 | phosphatidylinositol-5-phosphate 4-kinase, type II, beta                                 |
| MAPK8    | ENST00000374182.3 | mitogen-activated protein kinase 8                                                       |
| TUBD1    | ENST00000346141.6 | tubulin, delta 1                                                                         |
| YLPM1    | ENST00000552421.1 | YLP motif containing 1                                                                   |
| YWHAB    | ENST00000353703.4 | tyrosine 3-monooxygenase/tryptophan 5-monooxygenase activation protein, beta polypeptide |
| ATG7     | ENST00000354449.3 | autophagy related 7                                                                      |
| HNRNPR   | ENST00000478691.1 | heterogeneous nuclear ribonucleoprotein R                                                |
| SLC44A1  | ENST00000374720.3 | solute carrier family 44 (choline transporter), member 1                                 |
| MBD2     | ENST00000256429.3 | methyl-CpG binding domain protein 2                                                      |
| KARS     | ENST00000568378.1 | lysyl-tRNA synthetase                                                                    |
| KIAA1462 | ENST00000375377.1 | KIAA1462                                                                                 |
| FTO      | ENST00000471389.1 | fat mass and obesity associated                                                          |
| MAP3K2   | ENST00000409947.1 | mitogen-activated protein kinase kinase kinase 2                                         |
| EXT1     | ENST00000378204.2 | exostosin glycosyltransferase 1                                                          |
| IQSEC2   | ENST00000375365.2 | IQ motif and Sec7 domain 2                                                               |
| IL1RAPL1 | ENST00000378993.1 | interleukin 1 receptor accessory protein-like 1                                          |
| KCNH1    | ENST00000271751.4 | potassium voltage-gated channel, subfamily H (eag-related), member 1                     |
| SLITRK3  | ENST00000475390.1 | SLIT and NTRK-like family, member 3                                                      |
| KCNC2    | ENST00000393288.2 | potassium voltage-gated channel, Shaw-related subfamily, member 2                        |
| ZBTB20   | ENST00000462705.1 | zinc finger and BTB domain containing 20                                                 |
| KLHL36   | ENST00000564996.1 | kelch-like family member 36                                                              |
| SHC3     | ENST00000375835.4 | SHC (Src homology 2 domain containing) transforming protein 3                            |
| PBX1     | ENST00000367897.1 | pre-B-cell leukemia homeobox 1                                                           |
| DDX5     | ENST00000225792.5 | DEAD (Asp-Glu-Ala-Asp) box helicase 5                                                    |
| TMEM134  | ENST00000393877.3 | transmembrane protein 134                                                                |

Supplementary Table 3: Human miR-141-3p targets predicted by TargetScan

| Target gene | Representative transcript | Gene name                                                                                 |
|-------------|---------------------------|-------------------------------------------------------------------------------------------|
| ZNF385D     | ENST00000281523.2         | zinc finger protein 385D                                                                  |
| ZEB1        | ENST00000361642.5         | zinc finger E-box binding homeobox 1                                                      |
| ZFR         | ENST00000265069.8         | zinc finger RNA binding protein                                                           |
| ACOT7       | ENST00000608083.1         | acyl-CoA thioesterase 7                                                                   |
| TMEM170B    | ENST00000379426.1         | transmembrane protein 170B                                                                |
| ZNHIT3      | ENST00000490126.2         | zinc finger, HIT-type containing 3                                                        |
| ZEB2        | ENST00000558170.2         | zinc finger E-box binding homeobox 2                                                      |
| ANP32E      | ENST00000533654.1         | acidic (leucine-rich) nuclear phosphoprotein 32 family, member E                          |
| TADA1       | ENST00000367874.4         | transcriptional adaptor 1                                                                 |
| RNF145      | ENST00000274542.2         | ring finger protein 145                                                                   |
| YWHAG       | ENST00000307630.3         | tyrosine 3-monooxygenase/tryptophan 5-monooxygenase activation protein, gamma polypeptide |
| UGT1A1      | ENST00000373450.4         | UDP glucuronosyltransferase 1 family, polypeptide A1                                      |
| SCHIP1      | ENST00000445224.2         | schwannomin interacting protein 1                                                         |
| MAGED4      | ENST00000375626.3         | melanoma antigen family D, 4                                                              |
| DR1         | ENST00000370272.4         | down-regulator of transcription 1, TBP-binding (negative cofactor 2)                      |
| MAGED4B     | ENST00000360134.6         | melanoma antigen family D, 4B                                                             |
| TGFB2       | ENST00000366930.4         | transforming growth factor, beta 2                                                        |
| STAT4       | ENST00000358470.4         | signal transducer and activator of transcription 4                                        |
| NME1        | ENST00000511355.1         | NME/NM23 nucleoside diphosphate kinase 1                                                  |
| DMWD        | ENST00000377735.3         | dystrophia myotonica, WD repeat containing                                                |
| SCD5        | ENST00000319540.4         | stearoyl-CoA desaturase 5                                                                 |
| ZCCHC24     | ENST00000372336.3         | zinc finger, CCHC domain containing 24                                                    |
| LPAR3       | ENST00000440886.1         | lysophosphatidic acid receptor 3                                                          |
| RANBP6      | ENST00000259569.5         | RAN binding protein 6                                                                     |
| RFX7        | ENST00000423270.1         | regulatory factor X, 7                                                                    |
| DEK         | ENST00000397239.3         | DEK oncogene                                                                              |
| GSG1        | ENST00000396302.3         | germ cell associated 1                                                                    |
| BRI3BP      | ENST00000341446.8         | BRI3 binding protein                                                                      |
| IQCI-SCHIP1 | ENST00000337808.6         | IQCI-SCHIP1 readthrough                                                                   |
| KLHDC2      | ENST00000557247.1         | kelch domain containing 2                                                                 |
| CDK8        | ENST00000536792.1         | cyclin-dependent kinase 8                                                                 |
| WTAP        | ENST00000358372.4         | Wilms tumor 1 associated protein                                                          |
| ELAVL2      | ENST00000380110.4         | ELAV like neuron-specific RNA binding protein 2                                           |
| HMG20A      | ENST00000336216.4         | high mobility group 20A                                                                   |
| STX2        | ENST00000392373.2         | syntaxin 2                                                                                |
| EPHA7       | ENST00000369303.4         | EPH receptor A7                                                                           |
| SLC35C1     | ENST00000314134.3         | solute carrier family 35 (GDP-fucose transporter), member C1                              |
| KLF12       | ENST00000377669.2         | Kruppel-like factor 12                                                                    |
| HECTD1      | ENST00000553700.1         | HECT domain containing E3 ubiquitin protein ligase 1                                      |
| PHYHIPL     | ENST00000373880.4         | phytanoyl-CoA 2-hydroxylase interacting protein-like                                      |
| LMO3        | ENST00000354662.1         | LIM domain only 3 (rhombotin-like 2)                                                      |
| RALGPS2     | ENST00000367635.3         | Ral GEF with PH domain and SH3 binding motif 2                                            |
| MSANTD4     | ENST00000301919.4         | Myb/SANT-like DNA-binding domain containing 4 with coiled-coils                           |
| PGRMC2      | ENST00000296425.5         | progesterone receptor membrane component 2                                                |
| SOBP        | ENST00000317357.5         | sine oculis binding protein homolog (Drosophila)                                          |
| UGT1A4      | ENST00000373409.3         | UDP glucuronosyltransferase 1 family, polypeptide A4                                      |
| UGT1A7      | ENST00000373426.3         | UDP glucuronosyltransferase 1 family, polypeptide A7                                      |
| UGT1A3      | ENST00000482026.1         | UDP glucuronosyltransferase 1 family, polypeptide A3                                      |
| UGT1A9      | ENST00000354728.4         | UDP glucuronosyltransferase 1 family, polypeptide A9                                      |
| UGT1A5      | ENST00000373414.3         | UDP glucuronosyltransferase 1 family, polypeptide A5                                      |
| UGT1A10     | ENST00000344644.5         | UDP glucuronosyltransferase 1 family, polypeptide A10                                     |
| YAF2        | ENST00000327791.4         | YY1 associated factor 2                                                                   |
| PRKACB      | ENST00000370689.2         | protein kinase, cAMP-dependent, catalytic, beta                                           |
| CCDC6       | ENST00000263102.6         | coiled-coil domain containing 6                                                           |
| FAM188A     | ENST00000378036.1         | family with sequence similarity 188, member A                                             |
| IGSF6       | ENST00000268389.4         | immunoglobulin superfamily, member 6                                                      |
| RWDD4       | ENST00000326397.5         | RWD domain containing 4                                                                   |
| EPHA2       | ENST00000358432.5         | EPH receptor A2                                                                           |
| TFRC        | ENST00000540528.1         | transferrin receptor                                                                      |
| CDC42EP3    | ENST00000295324.3         | CDC42 effector protein (Rho GTPase binding) 3                                             |
| CTNND2      | ENST00000304623.8         | catenin (cadherin-associated protein), delta 2                                            |
| B3GNT5      | ENST00000326505.3         | UDP-GlcNAc:betaGal beta-1,3-N-acetylglucosaminyltransferase 5                             |
| RARB        | ENST00000437042.2         | retinoic acid receptor, beta                                                              |

|          |                   |                                                                       |
|----------|-------------------|-----------------------------------------------------------------------|
| MDM1     | ENST00000540418.1 | Mdm1 nuclear protein homolog (mouse)                                  |
| FOXJ3    | ENST00000372571.1 | forkhead box J3                                                       |
| LYPLA1   | ENST00000316963.3 | lysophospholipase I                                                   |
| C4orf29  | ENST00000388795.5 | chromosome 4 open reading frame 29                                    |
| KIAA1430 | ENST00000458385.2 | KIAA1430                                                              |
| EXOC5    | ENST00000413566.2 | exocyst complex component 5                                           |
| MYBL1    | ENST00000522677.3 | v-myb avian myeloblastosis viral oncogene homolog-like 1              |
| LYSMD3   | ENST00000509384.1 | LysM, putative peptidoglycan-binding, domain containing 3             |
| ST3GAL3  | ENST00000372377.4 | ST3 beta-galactoside alpha-2,3-sialyltransferase 3                    |
| TMED9    | ENST00000332598.6 | transmembrane emp24 protein transport domain containing 9             |
| PIGW     | ENST00000328396.2 | phosphatidylinositol glycan anchor biosynthesis, class W              |
| MAP2K4   | ENST00000415385.3 | mitogen-activated protein kinase kinase 4                             |
| C16orf87 | ENST00000394806.2 | chromosome 16 open reading frame 87                                   |
| GRB2     | ENST00000392563.1 | growth factor receptor-bound protein 2                                |
| PPT2     | ENST00000361568.2 | palmitoyl-protein thioesterase 2                                      |
| TSHZ3    | ENST00000240587.4 | teashirt zinc finger homeobox 3                                       |
| DLC1     | ENST00000276297.4 | deleted in liver cancer 1                                             |
| CREBRF   | ENST00000540014.1 | CREB3 regulatory factor                                               |
| MBNL1    | ENST00000357472.3 | muscleblind-like splicing regulator 1                                 |
| TMEM135  | ENST00000340353.7 | transmembrane protein 135                                             |
| ST3GAL5  | ENST00000393808.3 | ST3 beta-galactoside alpha-2,3-sialyltransferase 5                    |
| TMEM192  | ENST00000306480.6 | transmembrane protein 192                                             |
| GPRC5C   | ENST00000481232.1 | G protein-coupled receptor, family C, group 5, member C               |
| MNX1     | ENST00000252971.6 | motor neuron and pancreas homeobox 1                                  |
| DSTYK    | ENST00000367160.4 | dual serine/threonine and tyrosine protein kinase                     |
| LAMTOR3  | ENST00000499666.2 | late endosomal/lysosomal adaptor, MAPK and MTOR activator 3           |
| ZBTB34   | ENST00000319119.4 | zinc finger and BTB domain containing 34                              |
| ZCCHC3   | ENST00000382352.3 | zinc finger, CCHC domain containing 3                                 |
| H2AFZ    | ENST00000296417.5 | H2A histone family, member Z                                          |
| ACO1     | ENST00000309951.6 | aconitase 1, soluble                                                  |
| STX16    | ENST00000355957.5 | syntaxin 16                                                           |
| FOXC1    | ENST00000380874.2 | forkhead box C1                                                       |
| GPR137C  | ENST00000321662.6 | G protein-coupled receptor 137C                                       |
| GLRX     | ENST00000379979.4 | glutaredoxin (thioltransferase)                                       |
| PTP4A1   | ENST00000370651.3 | protein tyrosine phosphatase type IVA, member 1                       |
| CCNE2    | ENST00000520509.1 | cyclin E2                                                             |
| KCTD20   | ENST00000373731.2 | potassium channel tetramerization domain containing 20                |
| ATXN7L1  | ENST00000419735.3 | ataxin 7-like 1                                                       |
| NUDCD1   | ENST00000239690.4 | NudC domain containing 1                                              |
| SLC30A1  | ENST00000367001.4 | solute carrier family 30 (zinc transporter), member 1                 |
| PTEN     | ENST00000371953.3 | phosphatase and tensin homolog                                        |
| E2F3     | ENST00000346618.3 | E2F transcription factor 3                                            |
| CRIP2    | ENST00000329146.4 | cysteine-rich protein 2                                               |
| BRD3     | ENST00000303407.7 | bromodomain containing 3                                              |
| NDNF     | ENST00000379692.4 | neuron-derived neurotrophic factor                                    |
| RHEB     | ENST00000262187.5 | Ras homolog enriched in brain                                         |
| RBM33    | ENST00000341148.3 | RNA binding motif protein 33                                          |
| LUZP6    | ENST00000589735.1 | leucine zipper protein 6                                              |
| HSPA13   | ENST00000285667.3 | heat shock protein 70kDa family, member 13                            |
| HS2ST1   | ENST00000370550.5 | heparan sulfate 2-O-sulfotransferase 1                                |
| ERG      | ENST00000398905.1 | v-ets avian erythroblastosis virus E26 oncogene homolog               |
| SYT4     | ENST00000255224.3 | synaptotagmin IV                                                      |
| CDC14A   | ENST00000370125.2 | cell division cycle 14A                                               |
| DCP2     | ENST00000389063.2 | decapping mRNA 2                                                      |
| SYT6     | ENST00000607941.1 | synaptotagmin VI                                                      |
| PPM1L    | ENST00000498165.1 | protein phosphatase, Mg <sup>2+</sup> /Mn <sup>2+</sup> dependent, 1L |
| ALG2     | ENST00000476832.1 | ALG2, alpha-1,3/1,6-mannosyltransferase                               |
| TENM3    | ENST00000511685.1 | teneurin transmembrane protein 3                                      |
| TMEM110  | ENST00000355083.5 | transmembrane protein 110                                             |
| RAB38    | ENST00000243662.6 | RAB38, member RAS oncogene family                                     |
| PANK3    | ENST00000239231.6 | pantothenate kinase 3                                                 |
| FAM220A  | ENST00000313324.4 | family with sequence similarity 220, member A                         |
| C21orf91 | ENST00000400558.3 | chromosome 21 open reading frame 91                                   |
| MAP7D1   | ENST00000316156.4 | MAP7 domain containing 1                                              |
| FAM91A1  | ENST00000334705.7 | family with sequence similarity 91, member A1                         |
| KHDRBS3  | ENST00000355849.5 | KH domain containing, RNA binding, signal transduction associated 3   |



|              |                   |                                                                                              |
|--------------|-------------------|----------------------------------------------------------------------------------------------|
| RAP2C        | ENST00000342983.2 | RAP2C, member of RAS oncogene family                                                         |
| ENPP5        | ENST00000371383.2 | ectonucleotide pyrophosphatase/phosphodiesterase 5 (putative)                                |
| SLC6A9       | ENST00000372310.3 | solute carrier family 6 (neurotransmitter transporter, glycine), member 9                    |
| NUP98        | ENST00000359171.4 | nucleoporin 98kDa                                                                            |
| FGFR1OP      | ENST00000366847.4 | FGFR1 oncogene partner                                                                       |
| OLIG3        | ENST00000367734.2 | oligodendrocyte transcription factor 3                                                       |
| MN1          | ENST00000302326.4 | meningioma (disrupted in balanced translocation) 1                                           |
| HMGCS1       | ENST00000325110.6 | 3-hydroxy-3-methylglutaryl-CoA synthase 1 (soluble)                                          |
| ARL4A        | ENST00000396663.1 | ADP-ribosylation factor-like 4A                                                              |
| FAM118B      | ENST00000533050.1 | family with sequence similarity 118, member B                                                |
| TTBK2        | ENST00000267890.6 | tau tubulin kinase 2                                                                         |
| KIAA0408     | ENST00000483725.3 | KIAA0408                                                                                     |
| PTPRG        | ENST00000474889.1 | protein tyrosine phosphatase, receptor type, G                                               |
| MMP16        | ENST00000286614.6 | matrix metalloproteinase 16 (membrane-inserted)                                              |
| C6orf120     | ENST00000332290.2 | chromosome 6 open reading frame 120                                                          |
| RBM7         | ENST00000541475.1 | RNA binding motif protein 7                                                                  |
| SLMO2        | ENST00000355937.4 | slowmo homolog 2 (Drosophila)                                                                |
| TP53INP1     | ENST00000448464.2 | tumor protein p53 inducible nuclear protein 1                                                |
| GNA13        | ENST00000439174.2 | guanine nucleotide binding protein (G protein), alpha 13                                     |
| MBTPS2       | ENST00000379484.5 | membrane-bound transcription factor peptidase, site 2                                        |
| HCAR3        | ENST00000528880.2 | hydroxycarboxylic acid receptor 3                                                            |
| CRLF3        | ENST00000324238.6 | cytokine receptor-like factor 3                                                              |
| RBM20        | ENST00000369519.3 | RNA binding motif protein 20                                                                 |
| RP5-105215.2 | ENST00000370548.2 | Heparan sulfate 2-O-sulfotransferase 1                                                       |
| DAPK1        | ENST00000469640.2 | death-associated protein kinase 1                                                            |
| YTHDF2       | ENST00000373812.3 | YTH domain family, member 2                                                                  |
| ATP8A1       | ENST00000381668.5 | ATPase, aminophospholipid transporter (APLT), class I, type 8A, member 1                     |
| FBXL2        | ENST00000484457.1 | F-box and leucine-rich repeat protein 2                                                      |
| YPEL5        | ENST00000379520.3 | yippee-like 5 (Drosophila)                                                                   |
| HCAR2        | ENST00000328880.5 | hydroxycarboxylic acid receptor 2                                                            |
| PITX2        | ENST00000394595.3 | paired-like homeodomain 2                                                                    |
| SFPQ         | ENST00000357214.5 | splicing factor proline/glutamine-rich                                                       |
| CCNL2        | ENST00000408952.5 | cyclin L2                                                                                    |
| TSC1         | ENST00000298552.3 | tuberous sclerosis 1                                                                         |
| CFL2         | ENST00000341223.3 | cofilin 2 (muscle)                                                                           |
| PLEKHA8      | ENST00000449726.1 | pleckstrin homology domain containing, family A (phosphoinositide binding specific) member 8 |
| ABL2         | ENST00000502732.1 | c-abl oncogene 2, non-receptor tyrosine kinase                                               |
| DZIP1        | ENST00000347108.3 | DAZ interacting zinc finger protein 1                                                        |
| TNRC6B       | ENST00000335727.9 | trinucleotide repeat containing 6B                                                           |
| CDK6         | ENST00000265734.4 | cyclin-dependent kinase 6                                                                    |
| IRS2         | ENST00000375856.3 | insulin receptor substrate 2                                                                 |
| KEAP1        | ENST00000171111.5 | kelch-like ECH-associated protein 1                                                          |
| ATF5         | ENST00000423777.2 | activating transcription factor 5                                                            |
| TNKS2        | ENST00000371627.4 | tankyrase, TRF1-interacting ankyrin-related ADP-ribose polymerase 2                          |
| ANKFY1       | ENST00000341657.4 | ankyrin repeat and FYVE domain containing 1                                                  |
| SLC35D1      | ENST00000235345.5 | solute carrier family 35 (UDP-GlcA/UDP-GalNAc transporter), member D1                        |
| PFKM         | ENST00000312352.7 | phosphofructokinase, muscle                                                                  |
| EXOC7        | ENST00000607838.1 | exocyst complex component 7                                                                  |
| STRN         | ENST00000263918.4 | striatin, calmodulin binding protein                                                         |
| GMPS         | ENST00000496455.2 | guanine monphosphate synthase                                                                |
| MYT1L        | ENST00000399161.2 | myelin transcription factor 1-like                                                           |
| STAG1        | ENST00000383202.2 | stromal antigen 1                                                                            |
| PLCL1        | ENST00000428675.1 | phospholipase C-like 1                                                                       |
| CCDC80       | ENST00000206423.3 | coiled-coil domain containing 80                                                             |
| ATXN1        | ENST00000244769.4 | ataxin 1                                                                                     |
| ADRB1        | ENST00000369295.2 | adrenoceptor beta 1                                                                          |
| TMEM56       | ENST00000370203.4 | transmembrane protein 56                                                                     |
| HCN1         | ENST00000303230.4 | hyperpolarization activated cyclic nucleotide-gated potassium channel 1                      |
| FOXA1        | ENST00000250448.2 | forkhead box A1                                                                              |
| HGF          | ENST00000222390.5 | hepatocyte growth factor (hepapoietin A; scatter factor)                                     |
| CHP1         | ENST00000334660.5 | calcineurin-like EF-hand protein 1                                                           |
| VSIG8        | ENST00000368100.1 | V-set and immunoglobulin domain containing 8                                                 |
| PLAG1        | ENST00000316981.3 | pleiomorphic adenoma gene 1                                                                  |
| SIAH1        | ENST00000380006.2 | siah E3 ubiquitin protein ligase 1                                                           |
| KIF17        | ENST00000375044.1 | kinesin family member 17                                                                     |
| FAM168B      | ENST00000409185.1 | family with sequence similarity 168, member B                                                |

|          |                   |                                                                                         |
|----------|-------------------|-----------------------------------------------------------------------------------------|
| SRC      | ENST00000373578.2 | v-src avian sarcoma (Schmidt-Ruppin A-2) viral oncogene homolog                         |
| RNF185   | ENST00000326132.6 | ring finger protein 185                                                                 |
| TTL7     | ENST00000260505.8 | tubulin tyrosine ligase-like family, member 7                                           |
| PHB2     | ENST00000546111.1 | prohibitin 2                                                                            |
| EPGN     | ENST00000413830.1 | epithelial mitogen                                                                      |
| ARHGEF18 | ENST00000319670.9 | Rho/Rac guanine nucleotide exchange factor (GEF) 18                                     |
| PCNXL4   | ENST00000535349.1 | pecanex-like 4 (Drosophila)                                                             |
| UBE2G1   | ENST00000396981.2 | ubiquitin-conjugating enzyme E2G 1                                                      |
| SIK1     | ENST00000270162.6 | salt-inducible kinase 1                                                                 |
| NAP1L4   | ENST00000380542.4 | nucleosome assembly protein 1-like 4                                                    |
| LPGAT1   | ENST00000366997.4 | lysophosphatidylglycerol acyltransferase 1                                              |
| NR6A1    | ENST00000487099.2 | nuclear receptor subfamily 6, group A, member 1                                         |
| TMEM70   | ENST00000517439.1 | transmembrane protein 70                                                                |
| CLOCK    | ENST00000309964.4 | clock circadian regulator                                                               |
| NCOA2    | ENST00000452400.2 | nuclear receptor coactivator 2                                                          |
| MAP2K7   | ENST00000397981.3 | mitogen-activated protein kinase kinase 7                                               |
| SNX18    | ENST00000343017.6 | sorting nexin 18                                                                        |
| DDX5     | ENST00000225792.5 | DEAD (Asp-Glu-Ala-Asp) box helicase 5                                                   |
| ULK2     | ENST00000395544.4 | unc-51 like autophagy activating kinase 2                                               |
| LDLRAD4  | ENST00000399848.3 | low density lipoprotein receptor class A domain containing 4                            |
| REEP3    | ENST00000373758.4 | receptor accessory protein 3                                                            |
| CRMP1    | ENST00000324989.7 | collapsin response mediator protein 1                                                   |
| GPC2     | ENST00000292377.2 | glypican 2                                                                              |
| ERC2     | ENST00000288221.6 | ELKS/RAB6-interacting/CAST family member 2                                              |
| KDM3A    | ENST00000409556.1 | lysine (K)-specific demethylase 3A                                                      |
| PAQR9    | ENST00000340634.3 | progesterone and adiponectin receptor family member IX                                  |
| CHD2     | ENST00000394196.4 | chromodomain helicase DNA binding protein 2                                             |
| TFAP2A   | ENST00000379613.3 | transcription factor AP-2 alpha (activating enhancer binding protein 2 alpha)           |
| KHDRBS2  | ENST00000281156.4 | KH domain containing, RNA binding, signal transduction associated 2                     |
| HIAT1    | ENST00000370152.3 | hippocampus abundant transcript 1                                                       |
| DUSP3    | ENST00000226004.3 | dual specificity phosphatase 3                                                          |
| FKBP5    | ENST00000536438.1 | FK506 binding protein 5                                                                 |
| TRIM23   | ENST00000231524.9 | tripartite motif containing 23                                                          |
| CSF3     | ENST00000394149.3 | colony stimulating factor 3 (granulocyte)                                               |
| SLC6A5   | ENST00000525748.1 | solute carrier family 6 (neurotransmitter transporter), member 5                        |
| HNRNPF   | ENST00000357065.4 | heterogeneous nuclear ribonucleoprotein F                                               |
| PEG3     | ENST00000423103.2 | paternally expressed 3                                                                  |
| LMBR1    | ENST00000353442.5 | limb development membrane protein 1                                                     |
| MTPN     | ENST00000393085.3 | myotrophin                                                                              |
| ZNF281   | ENST00000294740.3 | zinc finger protein 281                                                                 |
| SRSF10   | ENST00000343255.5 | serine/arginine-rich splicing factor 10                                                 |
| FOXA2    | ENST00000419308.2 | forkhead box A2                                                                         |
| CIAO1    | ENST00000488633.1 | cytosolic iron-sulfur protein assembly 1                                                |
| HOXA11   | ENST00000006015.3 | homeobox A11                                                                            |
| TSPAN4   | ENST00000397396.1 | tetraspanin 4                                                                           |
| GNAI1    | ENST00000351004.3 | guanine nucleotide binding protein (G protein), alpha inhibiting activity polypeptide 1 |
| STAT5A   | ENST00000345506.4 | signal transducer and activator of transcription 5A                                     |
| ZFAND5   | ENST00000237937.3 | zinc finger, AN1-type domain 5                                                          |
| FBXW2    | ENST00000608872.1 | F-box and WD repeat domain containing 2                                                 |
| DOCK4    | ENST00000428084.1 | dedicator of cytokinesis 4                                                              |
| IKZF2    | ENST00000457361.1 | IKAROS family zinc finger 2 (Helios)                                                    |
| SRM      | ENST00000376957.2 | spermidine synthase                                                                     |
| MBNL3    | ENST00000370839.3 | muscleblind-like splicing regulator 3                                                   |
| SREK1IP1 | ENST00000513458.4 | SREK1-interacting protein 1                                                             |
| TMEM216  | ENST00000334888.5 | transmembrane protein 216                                                               |
| MYH10    | ENST00000360416.3 | myosin, heavy chain 10, non-muscle                                                      |
| FAM160B1 | ENST00000369248.4 | family with sequence similarity 160, member B1                                          |
| FAM184B  | ENST00000265018.3 | family with sequence similarity 184, member B                                           |
| RYBP     | ENST00000477973.2 | RING1 and YY1 binding protein                                                           |
| FNBP1L   | ENST00000370253.2 | formin binding protein 1-like                                                           |
| CALCR    | ENST00000359558.2 | calcitonin receptor                                                                     |
| QSER1    | ENST00000399302.2 | glutamine and serine rich 1                                                             |
| OSBPL11  | ENST00000296220.5 | oxysterol binding protein-like 11                                                       |
| C18orf21 | ENST00000592875.1 | chromosome 18 open reading frame 21                                                     |
| KLHDC10  | ENST00000335420.5 | kelch domain containing 10                                                              |
| BAHD1    | ENST00000416165.1 | bromo adjacent homology domain containing 1                                             |

|          |                   |                                                                                  |
|----------|-------------------|----------------------------------------------------------------------------------|
| ZMPSTE24 | ENST00000372759.3 | zinc metallopeptidase STE24                                                      |
| SPAG9    | ENST00000262013.7 | sperm associated antigen 9                                                       |
| NRIP3    | ENST00000309166.3 | nuclear receptor interacting protein 3                                           |
| GPR12    | ENST00000405846.3 | G protein-coupled receptor 12                                                    |
| ZBTB16   | ENST00000335953.4 | zinc finger and BTB domain containing 16                                         |
| SPRYD3   | ENST00000301463.4 | SPRY domain containing 3                                                         |
| URGCP    | ENST00000223341.7 | upregulator of cell proliferation                                                |
| AKIRIN1  | ENST00000432648.3 | akirin 1                                                                         |
| UBE3A    | ENST00000232165.3 | ubiquitin protein ligase E3A                                                     |
| LYPD6    | ENST00000334166.4 | LY6/PLAUR domain containing 6                                                    |
| NRP1     | ENST00000374875.1 | neuropilin 1                                                                     |
| WAPAL    | ENST00000298767.5 | wings apart-like homolog (Drosophila)                                            |
| APBB2    | ENST00000295974.8 | amyloid beta (A4) precursor protein-binding, family B, member 2                  |
| ELMOD2   | ENST00000323570.3 | ELMO/CED-12 domain containing 2                                                  |
| STXBP5   | ENST00000367481.3 | syntaxin binding protein 5 (tomosyn)                                             |
| LUC7L3   | ENST00000505658.1 | LUC7-like 3 (S. cerevisiae)                                                      |
| PCGF3    | ENST00000362003.5 | polycomb group ring finger 3                                                     |
| THRB     | ENST00000396671.2 | thyroid hormone receptor, beta                                                   |
| FNDC3B   | ENST00000336824.4 | fibronectin type III domain containing 3B                                        |
| RNFT1    | ENST00000442346.2 | ring finger protein, transmembrane 1                                             |
| KATNAL1  | ENST00000380615.3 | katanin p60 subunit A-like 1                                                     |
| RFX1     | ENST00000254325.4 | regulatory factor X, 1 (influences HLA class II expression)                      |
| SLC38A9  | ENST00000396865.2 | solute carrier family 38, member 9                                               |
| PPP1R15B | ENST00000367188.4 | protein phosphatase 1, regulatory subunit 15B                                    |
| FOXJ1    | ENST00000322957.6 | forkhead box J1                                                                  |
| EGLN1    | ENST00000366641.3 | egl-9 family hypoxia-inducible factor 1                                          |
| MEGF9    | ENST00000373930.3 | multiple EGF-like-domains 9                                                      |
| POU3F3   | ENST00000361360.2 | POU class 3 homeobox 3                                                           |
| NRXN1    | ENST00000342183.5 | neurexin 1                                                                       |
| LPIN2    | ENST00000261596.4 | lipin 2                                                                          |
| PPP2CA   | ENST00000481195.1 | protein phosphatase 2, catalytic subunit, alpha isozyme                          |
| PRELID2  | ENST00000334744.4 | PRELI domain containing 2                                                        |
| GOLM1    | ENST00000388712.3 | golgi membrane protein 1                                                         |
| CADM2    | ENST00000383699.3 | cell adhesion molecule 2                                                         |
| HOXB5    | ENST00000239151.5 | homeobox B5                                                                      |
| SUGT1    | ENST00000310528.8 | SGT1, suppressor of G2 allele of SKP1 (S. cerevisiae)                            |
| BNC2     | ENST00000380672.4 | basonuclin 2                                                                     |
| DCUN1D3  | ENST00000324344.4 | DCN1, defective in cullin neddylation 1, domain containing 3                     |
| DUSP7    | ENST00000495880.1 | dual specificity phosphatase 7                                                   |
| CDK17    | ENST00000543119.2 | cyclin-dependent kinase 17                                                       |
| FLJ20373 | ENST00000414004.2 |                                                                                  |
| MOB3B    | ENST00000262244.5 | MOB kinase activator 3B                                                          |
| STAT5B   | ENST00000293328.3 | signal transducer and activator of transcription 5B                              |
| MIER1    | ENST00000357692.2 | mesoderm induction early response 1, transcriptional regulator                   |
| KLF6     | ENST00000542957.1 | Kruppel-like factor 6                                                            |
| GCNT2    | ENST00000316170.3 | glucosaminyl (N-acetyl) transferase 2, l-branching enzyme (I blood group)        |
| CEP170   | ENST00000366542.1 | centrosomal protein 170kDa                                                       |
| RBM47    | ENST00000319592.4 | RNA binding motif protein 47                                                     |
| KCTD12   | ENST00000377474.2 | potassium channel tetramerization domain containing 12                           |
| FGF13    | ENST00000315930.6 | fibroblast growth factor 13                                                      |
| CBX1     | ENST00000393408.3 | chromobox homolog 1                                                              |
| SUV39H2  | ENST00000313519.5 | suppressor of variegation 3-9 homolog 2 (Drosophila)                             |
| NAP1L1   | ENST00000261182.8 | nucleosome assembly protein 1-like 1                                             |
| QKI      | ENST00000392127.2 | QKI, KH domain containing, RNA binding                                           |
| WDR81    | ENST00000437219.2 | WD repeat domain 81                                                              |
| PTCH1    | ENST00000430669.2 | patched 1                                                                        |
| PPP4R2   | ENST00000356692.5 | protein phosphatase 4, regulatory subunit 2                                      |
| SOGA3    | ENST00000556132.1 | SOGA family member 3                                                             |
| MOCS2    | ENST00000450852.3 | molybdenum cofactor synthesis 2                                                  |
| CORO1C   | ENST00000261401.3 | coronin, actin binding protein, 1C                                               |
| MPPED2   | ENST00000358117.5 | metallophosphoesterase domain containing 2                                       |
| AGPAT6   | ENST00000396987.3 | 1-acylglycerol-3-phosphate O-acyltransferase 6                                   |
| sep-07   | ENST00000435235.1 | septin 7                                                                         |
| OLFM1    | ENST00000371796.3 | olfactomedin 1                                                                   |
| MSL1     | ENST00000398532.4 | male-specific lethal 1 homolog (Drosophila)                                      |
| TAF12    | ENST00000373824.4 | TAF12 RNA polymerase II, TATA box binding protein (TBP)-associated factor, 20kDa |

|          |                    |                                                                                            |
|----------|--------------------|--------------------------------------------------------------------------------------------|
| MEMO1    | ENST00000295065.5  | mediator of cell motility 1                                                                |
| SOGA2    | ENST00000359865.3  | SOGA family member 2                                                                       |
| MTF2     | ENST00000370298.4  | metal response element binding transcription factor 2                                      |
| CYP26B1  | ENST00000001146.2  | cytochrome P450, family 26, subfamily B, polypeptide 1                                     |
| PAX3     | ENST00000350526.4  | paired box 3                                                                               |
| MBTD1    | ENST00000586178.1  | mbt domain containing 1                                                                    |
| ZNF804B  | ENST00000333190.4  | zinc finger protein 804B                                                                   |
| ZBTB18   | ENST00000358704.4  | zinc finger and BTB domain containing 18                                                   |
| GATA3    | ENST00000379328.3  | GATA binding protein 3                                                                     |
| NXPB2    | ENST00000272641.3  | neurexophilin 2                                                                            |
| PSEN1    | ENST00000344094.3  | presenilin 1                                                                               |
| ARHGAP24 | ENST00000395184.1  | Rho GTPase activating protein 24                                                           |
| PCDH8    | ENST00000377942.3  | protocadherin 8                                                                            |
| PEAK1    | ENST00000312493.4  | pseudopodium-enriched atypical kinase 1                                                    |
| PRDM10   | ENST00000358825.5  | PR domain containing 10                                                                    |
| CCDC85C  | ENST00000380243.4  | coiled-coil domain containing 85C                                                          |
| FOXP1    | ENST00000318789.4  | forkhead box P1                                                                            |
| PITPNB   | ENST00000335272.5  | phosphatidylinositol transfer protein, beta                                                |
| sep-08   | ENST00000378706.1  | septin 8                                                                                   |
| TMEM57   | ENST00000399766.3  | transmembrane protein 57                                                                   |
| SHISA5   | ENST00000296444.2  | shisa family member 5                                                                      |
| CALU     | ENST00000535011.2  | calumenin                                                                                  |
| OTUD3    | ENST00000375120.3  | OTU domain containing 3                                                                    |
| RGS17    | ENST00000367225.2  | regulator of G-protein signaling 17                                                        |
| PPP2R5E  | ENST00000337537.3  | protein phosphatase 2, regulatory subunit B', epsilon isoform                              |
| HNRNPAB  | ENST00000358344.3  | heterogeneous nuclear ribonucleoprotein A/B                                                |
| CSNK1A1  | ENST00000261798.5  | casein kinase 1, alpha 1                                                                   |
| PPP2R2B  | ENST00000394413.3  | protein phosphatase 2, regulatory subunit B, beta                                          |
| CLASP2   | ENST00000539981.1  | cytoplasmic linker associated protein 2                                                    |
| STXBP1   | ENST00000373302.3  | syntaxin binding protein 1                                                                 |
| CELF1    | ENST00000395290.2  | CUGBP, Elav-like family member 1                                                           |
| S100BBP  | ENST00000373475.5  | S100P binding protein                                                                      |
| CDH10    | ENST00000264463.4  | cadherin 10, type 2 (T2-cadherin)                                                          |
| ATP1B1   | ENST00000367816.1  | ATPase, Na <sup>+</sup> /K <sup>+</sup> transporting, beta 1 polypeptide                   |
| PTPRD    | ENST00000381196.4  | protein tyrosine phosphatase, receptor type, D                                             |
| SAMD8    | ENST00000372687.4  | sterile alpha motif domain containing 8                                                    |
| PRKAR1A  | ENST00000589228.1  | protein kinase, cAMP-dependent, regulatory, type I, alpha                                  |
| OXS1     | ENST00000311806.3  | oxidative stress responsive 1                                                              |
| PPP3R1   | ENST00000234310.3  | protein phosphatase 3, regulatory subunit B, alpha                                         |
| PAPD4    | ENST00000453514.1  | PAP associated domain containing 4                                                         |
| CD47     | ENST00000361309.5  | CD47 molecule                                                                              |
| ITPR1L2  | ENST00000381440.3  | inositol 1,4,5-trisphosphate receptor interacting protein-like 2                           |
| XIAP     | ENST00000371199.3  | X-linked inhibitor of apoptosis                                                            |
| GSKIP    | ENST00000555181.1  | GSK3B interacting protein                                                                  |
| CDV3     | ENST00000420115.2  | CDV3 homolog (mouse)                                                                       |
| PRICKLE1 | ENST00000455697.1  | prickle homolog 1 (Drosophila)                                                             |
| SUPT6H   | ENST00000314616.6  | suppressor of Ty 6 homolog (S. cerevisiae)                                                 |
| ANKRD44  | ENST00000282272.8  | ankyrin repeat domain 44                                                                   |
| AKAP2    | ENST00000374525.1  | A kinase (PRKA) anchor protein 2                                                           |
| RIMS1    | ENST00000348717.5  | regulating synaptic membrane exocytosis 1                                                  |
| HMGB1    | ENST00000399489.1  | high mobility group box 1                                                                  |
| PXK      | ENST00000463280.1  | PX domain containing serine/threonine kinase                                               |
| IDS      | ENST00000422081.2  | Iduronate 2-sulfatase (Hunter syndrome), isoform CRA_e; Iduronate 2-sulfatase 14 kDa chain |
| SIX1     | ENST00000247182.6  | SIX homeobox 1                                                                             |
| SERINC1  | ENST00000339697.4  | serine incorporator 1                                                                      |
| C3orf14  | ENST00000494481.1  | chromosome 3 open reading frame 14                                                         |
| TNPO3    | ENST00000393245.1  | transportin 3                                                                              |
| BACH2    | ENST00000257749.4  | BTB and CNC homology 1, basic leucine zipper transcription factor 2                        |
| C21orf62 | ENST00000536776.1  | chromosome 21 open reading frame 62                                                        |
| HTR2A    | ENST00000378688.4  | 5-hydroxytryptamine (serotonin) receptor 2A, G protein-coupled                             |
| TANC2    | ENST00000424789.2  | tetratricopeptide repeat, ankyrin repeat and coiled-coil containing 2                      |
| ELF2     | ENST00000394235.2  | E74-like factor 2 (ets domain transcription factor)                                        |
| PDS5B    | ENST00000315596.10 | PDS5, regulator of cohesion maintenance, homolog B (S. cerevisiae)                         |
| NXPB1    | ENST00000405863.1  | neurexophilin 1                                                                            |
| RANBP9   | ENST00000011619.3  | RAN binding protein 9                                                                      |
| TAB2     | ENST00000367456.1  | TGF-beta activated kinase 1/MAP3K7 binding protein 2                                       |

|             |                   |                                                                                 |
|-------------|-------------------|---------------------------------------------------------------------------------|
| SREK1       | ENST00000334121.6 | splicing regulatory glutamine/lysine-rich protein 1                             |
| ZBTB20      | ENST00000462705.1 | zinc finger and BTB domain containing 20                                        |
| DOLPP1      | ENST00000540102.1 | dolichyldiphosphatase 1                                                         |
| LHX6        | ENST00000373755.2 | LIM homeobox 6                                                                  |
| IGF2BP2     | ENST00000382199.2 | insulin-like growth factor 2 mRNA binding protein 2                             |
| OSBPL1A     | ENST00000319481.3 | oxysterol binding protein-like 1A                                               |
| MEIS2       | ENST00000397624.3 | Meis homeobox 2                                                                 |
| PALM2-AKAP2 | ENST00000374530.3 | PALM2-AKAP2 readthrough                                                         |
| CHD9        | ENST00000566029.1 | chromodomain helicase DNA binding protein 9                                     |
| TMEM237     | ENST00000409444.2 | transmembrane protein 237                                                       |
| LONRF2      | ENST00000393437.3 | LON peptidase N-terminal domain and ring finger 2                               |
| H1FO        | ENST00000340857.2 | H1 histone family, member 0                                                     |
| DIS3        | ENST00000377767.4 | DIS3 mitotic control homolog (S. cerevisiae)                                    |
| WDR31       | ENST00000341761.4 | WD repeat domain 31                                                             |
| MAP3K2      | ENST00000409947.1 | mitogen-activated protein kinase kinase kinase 2                                |
| AMPD2       | ENST00000342115.4 | adenosine monophosphate deaminase 2                                             |
| MIER3       | ENST00000381226.3 | mesoderm induction early response 1, family member 3                            |
| RNF44       | ENST00000274811.4 | ring finger protein 44                                                          |
| SEC11A      | ENST00000560266.1 | SEC11 homolog A (S. cerevisiae)                                                 |
| ZNF660      | ENST00000322734.2 | zinc finger protein 660                                                         |
| AMOTL1      | ENST00000317837.9 | angiomin like 1                                                                 |
| ATF6        | ENST00000367942.3 | activating transcription factor 6                                               |
| PRKD1       | ENST00000331968.5 | protein kinase D1                                                               |
| CDC42       | ENST00000344548.3 | cell division cycle 42                                                          |
| GJC1        | ENST00000426548.1 | gap junction protein, gamma 1, 45kDa                                            |
| RAB30       | ENST00000533486.1 | RAB30, member RAS oncogene family                                               |
| CDC25A      | ENST00000302506.3 | cell division cycle 25A                                                         |
| NAA60       | ENST00000610180.1 | N-alpha-acetyltransferase 60                                                    |
| SMC5        | ENST00000361138.5 | structural maintenance of chromosomes 5                                         |
| TRAM2       | ENST00000182527.3 | translocation associated membrane protein 2                                     |
| SIPA1L2     | ENST00000366630.1 | signal-induced proliferation-associated 1 like 2                                |
| FLI1        | ENST00000527786.2 | Fli-1 proto-oncogene, ETS transcription factor                                  |
| PPP2R2A     | ENST00000380737.3 | protein phosphatase 2, regulatory subunit B, alpha                              |
| FSD1L       | ENST00000374710.3 | fibronectin type III and SPRY domain containing 1-like                          |
| SLC23A2     | ENST00000338244.1 | solute carrier family 23 (ascorbic acid transporter), member 2                  |
| NCAM1       | ENST00000316851.7 | neural cell adhesion molecule 1                                                 |
| RNF38       | ENST00000259605.6 | ring finger protein 38                                                          |
| BCL2L13     | ENST00000418951.2 | BCL2-like 13 (apoptosis facilitator)                                            |
| PLAGL2      | ENST00000246229.4 | pleiomorphic adenoma gene-like 2                                                |
| TMEM130     | ENST00000416379.2 | transmembrane protein 130                                                       |
| FRMD6       | ENST00000395718.2 | FERM domain containing 6                                                        |
| PLXDC1      | ENST00000315392.4 | plexin domain containing 1                                                      |
| NPAS3       | ENST00000346562.2 | neuronal PAS domain protein 3                                                   |
| SYNPO2      | ENST00000429713.2 | synaptopodin 2                                                                  |
| SLC29A2     | ENST00000311161.7 | solute carrier family 29 (equilibrative nucleoside transporter), member 2       |
| MATR3       | ENST00000510056.1 | matrin 3                                                                        |
| WDR52       | ENST00000393845.2 | WD repeat domain 52                                                             |
| ITSN1       | ENST00000379960.5 | intersectin 1 (SH3 domain protein)                                              |
| NFIA        | ENST00000403491.3 | nuclear factor I/A                                                              |
| SNAP91      | ENST00000521485.1 | synaptosomal-associated protein, 91kDa                                          |
| RSPO3       | ENST00000356698.4 | R-spondin 3                                                                     |
| ATAD2B      | ENST00000238789.5 | ATPase family, AAA domain containing 2B                                         |
| IRF2BP1     | ENST00000238647.3 | interferon regulatory factor 2 binding protein-like                             |
| RASSF8      | ENST00000541490.1 | Ras association (RalGDS/AF-6) domain family (N-terminal) member 8               |
| SEMA6A      | ENST00000343348.6 | sema domain, transmembrane domain (TM), and cytoplasmic domain, (semaphorin) 6A |
| PAPLN       | ENST00000381166.3 | papilin, proteoglycan-like sulfated glycoprotein                                |
| CNTN1       | ENST00000551295.2 | contactin 1                                                                     |
| MFN1        | ENST00000471841.1 | mitofusin 1                                                                     |
| NRP2        | ENST00000360409.3 | neuropilin 2                                                                    |
| ZNF638      | ENST00000355812.3 | zinc finger protein 638                                                         |
| TNS3        | ENST00000311160.9 | tensin 3                                                                        |
| RBM24       | ENST00000379052.5 | RNA binding motif protein 24                                                    |
| PHF21A      | ENST00000257821.4 | PHD finger protein 21A                                                          |
| GPHN        | ENST00000478722.1 | gephyrin                                                                        |
| AGFG1       | ENST00000310078.8 | ArfGAP with FG repeats 1                                                        |
| NECAB1      | ENST00000417640.2 | N-terminal EF-hand calcium binding protein 1                                    |

|           |                   |                                                                      |
|-----------|-------------------|----------------------------------------------------------------------|
| DUSP1     | ENST00000239223.3 | dual specificity phosphatase 1                                       |
| MACF1     | ENST00000567887.1 | microtubule-actin crosslinking factor 1                              |
| NRCAM     | ENST00000379028.3 | neuronal cell adhesion molecule                                      |
| TET3      | ENST00000409262.3 | tet methylcytosine dioxygenase 3                                     |
| CTBP2     | ENST00000337195.5 | C-terminal binding protein 2                                         |
| TIAL1     | ENST00000369093.2 | TIA1 cytotoxic granule-associated RNA binding protein-like 1         |
| NCKAP5    | ENST00000409261.1 | NCK-associated protein 5                                             |
| WDR43     | ENST00000407426.3 | WD repeat domain 43                                                  |
| GPR137B   | ENST00000366592.3 | G protein-coupled receptor 137B                                      |
| GPR75     | ENST00000394705.2 | G protein-coupled receptor 75                                        |
| KPNA3     | ENST00000261667.3 | karyopherin alpha 3 (importin alpha 4)                               |
| HECW1     | ENST00000395891.2 | HECT, C2 and WW domain containing E3 ubiquitin protein ligase 1      |
| KIAA2022  | ENST00000055682.6 | KIAA2022                                                             |
| GPC6      | ENST00000377047.4 | glypican 6                                                           |
| KIAA1549L | ENST00000321505.4 | KIAA1549-like                                                        |
| MARK1     | ENST00000366918.4 | MAP/microtubule affinity-regulating kinase 1                         |
| BEND4     | ENST00000504360.1 | BEN domain containing 4                                              |
| CGGBP1    | ENST00000309534.6 | CGG triplet repeat binding protein 1                                 |
| ZDHHC7    | ENST00000313732.4 | zinc finger, DHHC-type containing 7                                  |
| LENG8     | ENST00000326764.5 | leukocyte receptor cluster (LRC) member 8                            |
| PHLPP1    | ENST00000400316.4 | PH domain and leucine rich repeat protein phosphatase 1              |
| ATP2A2    | ENST00000395494.2 | ATPase, Ca <sup>++</sup> transporting, cardiac muscle, slow twitch 2 |
| GREB1L    | ENST00000580732.2 | growth regulation by estrogen in breast cancer-like                  |
| TNPO1     | ENST00000337273.5 | transportin 1                                                        |
| TAPT1     | ENST00000405303.2 | transmembrane anterior posterior transformation 1                    |
| BRWD1     | ENST00000342449.3 | bromodomain and WD repeat domain containing 1                        |
| DSEL      | ENST00000310045.7 | dermatan sulfate epimerase-like                                      |
| GRIN3A    | ENST00000361820.3 | glutamate receptor, ionotropic, N-methyl-D-aspartate 3A              |
| EIF4EBP2  | ENST00000373218.4 | eukaryotic translation initiation factor 4E binding protein 2        |
| ATP6V1C2  | ENST00000381661.3 | ATPase, H <sup>+</sup> transporting, lysosomal 42kDa, V1 subunit C2  |
| SORBS2    | ENST00000284776.7 | sorbin and SH3 domain containing 2                                   |
| IGF2      | ENST00000381395.1 | insulin-like growth factor 2 (somatomedin A)                         |
| KPNA4     | ENST00000334256.4 | karyopherin alpha 4 (importin alpha 3)                               |
| BAZ2B     | ENST00000392782.1 | bromodomain adjacent to zinc finger domain, 2B                       |
| PLCXD3    | ENST00000377801.3 | phosphatidylinositol-specific phospholipase C, X domain containing 3 |
| KIF1C     | ENST00000320785.5 | kinesin family member 1C                                             |
| ARHGAP23  | ENST00000431231.2 | Rho GTPase activating protein 23                                     |
| CSNK2A1   | ENST00000349736.5 | casein kinase 2, alpha 1 polypeptide                                 |
| ZNF641    | ENST00000301042.3 | zinc finger protein 641                                              |
| IRAK1BP1  | ENST00000369940.2 | interleukin-1 receptor-associated kinase 1 binding protein 1         |
| G3BP2     | ENST00000395719.3 | GTPase activating protein (SH3 domain) binding protein 2             |
| LPP       | ENST00000312675.4 | LIM domain containing preferred translocation partner in lipoma      |
| RHOBTB1   | ENST00000337910.5 | Rho-related BTB domain containing 1                                  |
| KIF3A     | ENST00000378746.4 | kinesin family member 3A                                             |
| CHRD1     | ENST00000372045.1 | chordin-like 1                                                       |
| EGR2      | ENST00000242480.3 | early growth response 2                                              |
| TRAPPC8   | ENST00000283351.4 | trafficking protein particle complex 8                               |
| MBD5      | ENST00000407073.1 | methyl-CpG binding domain protein 5                                  |
| ZNF704    | ENST00000327835.3 | zinc finger protein 704                                              |
| JAG1      | ENST00000254958.5 | jagged 1                                                             |
| PDZD2     | ENST00000438447.1 | PDZ domain containing 2                                              |
| NR2C2     | ENST00000425241.1 | nuclear receptor subfamily 2, group C, member 2                      |
| FAM126B   | ENST00000418596.3 | family with sequence similarity 126, member B                        |
| PLEKHB1   | ENST00000354190.5 | pleckstrin homology domain containing, family B (evectins) member 1  |
| CACNA2D1  | ENST00000356860.3 | calcium channel, voltage-dependent, alpha 2/delta subunit 1          |
| UNC5C     | ENST00000453304.1 | unc-5 homolog C (C. elegans)                                         |
| ENAH      | ENST00000366844.3 | enabled homolog (Drosophila)                                         |
| ZNF516    | ENST00000443185.2 | zinc finger protein 516                                              |
| OGT       | ENST00000373719.3 | O-linked N-acetylglucosamine (GlcNAc) transferase                    |
| MDGA1     | ENST00000297153.7 | MAM domain containing glycosylphosphatidylinositol anchor 1          |
| RCOR3     | ENST00000367006.4 | REST corepressor 3                                                   |
| PPP1R3G   | ENST00000405617.2 | protein phosphatase 1, regulatory subunit 3G                         |
| FAM168A   | ENST00000064778.4 | family with sequence similarity 168, member A                        |
| CAMSAP2   | ENST00000358823.2 | calmodulin regulated spectrin-associated protein family, member 2    |
| RUNX1     | ENST00000344691.4 | runt-related transcription factor 1                                  |
| C11orf30  | ENST00000529032.1 | chromosome 11 open reading frame 30                                  |

|         |                   |                                                                                                   |
|---------|-------------------|---------------------------------------------------------------------------------------------------|
| NEK6    | ENST00000373603.1 | NIMA-related kinase 6                                                                             |
| LSAMP   | ENST00000490035.2 | limbic system-associated membrane protein                                                         |
| CACNA1E | ENST00000526775.1 | calcium channel, voltage-dependent, R type, alpha 1E subunit                                      |
| GEMIN5  | ENST00000285873.7 | gem (nuclear organelle) associated protein 5                                                      |
| FAXC    | ENST00000389677.5 | failed axon connections homolog (Drosophila)                                                      |
| UBA6    | ENST00000322244.5 | ubiquitin-like modifier activating enzyme 6                                                       |
| ZNF629  | ENST00000262525.4 | zinc finger protein 629                                                                           |
| FBRS    | ENST00000356166.6 | fibrosin                                                                                          |
| WDFY3   | ENST00000322366.6 | WD repeat and FYVE domain containing 3                                                            |
| KDM2B   | ENST00000536437.1 | lysine (K)-specific demethylase 2B                                                                |
| SMARCE1 | ENST00000377808.4 | SWI/SNF related, matrix associated, actin dependent regulator of chromatin, subfamily e, member 1 |
| ARNTL   | ENST00000389708.3 | aryl hydrocarbon receptor nuclear translocator-like                                               |
| NIPBL   | ENST00000448238.2 | Nipped-B homolog (Drosophila)                                                                     |
| SLC38A2 | ENST00000256689.5 | solute carrier family 38, member 2                                                                |
| SIDT2   | ENST00000324225.4 | SID1 transmembrane family, member 2                                                               |
| WNT5A   | ENST00000474267.1 | wingless-type MMTV integration site family, member 5A                                             |
| ZBTB46  | ENST00000245663.4 | zinc finger and BTB domain containing 46                                                          |
| RORA    | ENST00000335670.6 | RAR-related orphan receptor A                                                                     |
| CAMSAP1 | ENST00000389532.4 | calmodulin regulated spectrin-associated protein 1                                                |
| RBMS1   | ENST00000348849.3 | RNA binding motif, single stranded interacting protein 1                                          |
| UBE2Z   | ENST00000360943.5 | ubiquitin-conjugating enzyme E2Z                                                                  |
| NAA50   | ENST00000240922.3 | N(alpha)-acetyltransferase 50, NatE catalytic subunit                                             |
| FAM46C  | ENST00000369448.3 | family with sequence similarity 46, member C                                                      |
| PGM2L1  | ENST00000298198.4 | phosphoglucomutase 2-like 1                                                                       |
| SPATS2  | ENST00000553127.1 | spermatogenesis associated, serine-rich 2                                                         |
| SLC5A3  | ENST00000608209.1 | sodium/myo-inositol cotransporter                                                                 |
| HDAC4   | ENST00000345617.3 | histone deacetylase 4                                                                             |
| RGAG1   | ENST00000465301.2 | retrotransposon gag domain containing 1                                                           |
| ZNF644  | ENST00000370440.1 | zinc finger protein 644                                                                           |
| ELL2    | ENST00000237853.4 | elongation factor, RNA polymerase II, 2                                                           |
| CELF6   | ENST00000287202.5 | CUGBP, Elav-like family member 6                                                                  |
| ARFGEF2 | ENST00000371917.4 | ADP-ribosylation factor guanine nucleotide-exchange factor 2 (brefeldin A-inhibited)              |
| RAD23B  | ENST00000358015.3 | RAD23 homolog B (S. cerevisiae)                                                                   |
| GDF6    | ENST00000287020.5 | growth differentiation factor 6                                                                   |
| ATP8A2  | ENST00000381655.2 | ATPase, aminophospholipid transporter, class I, type 8A, member 2                                 |
| NFASC   | ENST00000401399.1 | neurofascin                                                                                       |
| UBE2V2  | ENST00000523111.2 | ubiquitin-conjugating enzyme E2 variant 2                                                         |
| HIPK1   | ENST00000369558.1 | homeodomain interacting protein kinase 1                                                          |
| LRP1B   | ENST00000389484.3 | low density lipoprotein receptor-related protein 1B                                               |
| USP9X   | ENST00000324545.8 | ubiquitin specific peptidase 9, X-linked                                                          |
| FBXL19  | ENST00000338343.4 | F-box and leucine-rich repeat protein 19                                                          |
| RGS7BP  | ENST00000334025.2 | regulator of G-protein signaling 7 binding protein                                                |
| TTC28   | ENST00000397906.2 | tetratricopeptide repeat domain 28                                                                |
| FBXL20  | ENST00000394294.3 | F-box and leucine-rich repeat protein 20                                                          |
| ZNF436  | ENST00000314011.4 | zinc finger protein 436                                                                           |
| GCNT4   | ENST00000322348.4 | glucosaminyl (N-acetyl) transferase 4, core 2                                                     |
| RHPN2   | ENST00000254260.3 | rhopilin, Rho GTPase binding protein 2                                                            |
| WWTR1   | ENST00000465804.1 | WW domain containing transcription regulator 1                                                    |
| GMEB1   | ENST00000373816.1 | glucocorticoid modulatory element binding protein 1                                               |
| NUCKS1  | ENST00000367142.4 | nuclear casein kinase and cyclin-dependent kinase substrate 1                                     |
| FOXP2   | ENST00000408937.3 | forkhead box P2                                                                                   |
| MTA3    | ENST00000405592.1 | metastasis associated 1 family, member 3                                                          |
| RPH3AL  | ENST00000331302.7 | rabphilin 3A-like (without C2 domains)                                                            |
| IGDCC4  | ENST00000352385.2 | immunoglobulin superfamily, DCC subclass, member 4                                                |
| TTPAL   | ENST00000372906.2 | tocopherol (alpha) transfer protein-like                                                          |
| LRRC1   | ENST00000370888.1 | leucine rich repeat containing 1                                                                  |
| LRRC8A  | ENST00000372600.4 | leucine rich repeat containing 8 family, member A                                                 |
| MVB12B  | ENST00000361171.3 | multivesicular body subunit 12B                                                                   |
| ANKRD50 | ENST00000504087.1 | ankyrin repeat domain 50                                                                          |
| STK35   | ENST00000381482.3 | serine/threonine kinase 35                                                                        |
| SNRK    | ENST00000429705.2 | SNF related kinase                                                                                |
| VPS13B  | ENST00000395996.1 | vacuolar protein sorting 13 homolog B (yeast)                                                     |
| GPM6B   | ENST00000454189.2 | glycoprotein M6B                                                                                  |
| TNS1    | ENST00000171887.4 | tensin 1                                                                                          |
| ZKSCAN1 | ENST00000324306.6 | zinc finger with KRAB and SCAN domains 1                                                          |
| EVX2    | ENST00000308618.4 | even-skipped homeobox 2                                                                           |

|               |                   |                                                                              |
|---------------|-------------------|------------------------------------------------------------------------------|
| BAP1          | ENST00000460680.1 | BRCA1 associated protein-1 (ubiquitin carboxy-terminal hydrolase)            |
| SNX27         | ENST00000368843.3 | sorting nexin family member 27                                               |
| LPHN2         | ENST00000370715.1 | latrophilin 2                                                                |
| SPRY4         | ENST00000344120.4 | sprouty homolog 4 (Drosophila)                                               |
| SMG7          | ENST00000367537.3 | SMG7 nonsense mediated mRNA decay factor                                     |
| GIGYF1        | ENST00000275732.5 | GRB10 interacting GYF protein 1                                              |
| PAN2          | ENST00000425394.2 | PAN2 poly(A) specific ribonuclease subunit homolog (S. cerevisiae)           |
| CDON          | ENST00000392693.3 | cell adhesion associated, oncogene regulated                                 |
| PAQR5         | ENST00000395407.2 | progesterin and adipoQ receptor family member V                              |
| TMEM129       | ENST00000303277.2 | transmembrane protein 129                                                    |
| BRD4          | ENST00000263377.2 | bromodomain containing 4                                                     |
| APOLD1        | ENST00000356591.4 | apolipoprotein L domain containing 1                                         |
| NUMBL         | ENST00000252891.4 | numb homolog (Drosophila)-like                                               |
| PLXNA4        | ENST00000321063.4 | plexin A4                                                                    |
| GNL1          | ENST00000376621.3 | guanine nucleotide binding protein-like 1                                    |
| SOX6          | ENST00000316399.6 | SRY (sex determining region Y)-box 6                                         |
| USP53         | ENST00000450251.1 | ubiquitin specific peptidase 53                                              |
| NPTX1         | ENST00000306773.4 | neuronal pentraxin I                                                         |
| KRT222        | ENST00000394052.3 | keratin 222                                                                  |
| POU3F2        | ENST00000328345.5 | POU class 3 homeobox 2                                                       |
| PAPPA         | ENST00000328252.3 | pregnancy-associated plasma protein A, pappalysin 1                          |
| CSNK1G3       | ENST00000360683.2 | casein kinase 1, gamma 3                                                     |
| ANO6          | ENST00000320560.8 | anoctamin 6                                                                  |
| ONECUT1       | ENST00000560699.2 | one cut homeobox 1                                                           |
| SYNCRIP       | ENST00000355238.6 | synaptotagmin binding, cytoplasmic RNA interacting protein                   |
| TREH          | ENST00000529101.1 | trehalase (brush-border membrane glycoprotein)                               |
| C20orf194     | ENST00000453730.2 | chromosome 20 open reading frame 194                                         |
| MGAT5         | ENST00000409645.1 | mannosyl (alpha-1,6-) glycoprotein beta-1,6-N-acetyl-glucosaminyltransferase |
| MBOAT2        | ENST00000305997.3 | membrane bound O-acyltransferase domain containing 2                         |
| DONSON        | ENST00000453626.1 | downstream neighbor of SON                                                   |
| CACNA1I       | ENST00000402142.3 | calcium channel, voltage-dependent, T type, alpha 1I subunit                 |
| MCOLN3        | ENST00000370589.2 | mucopolip 3                                                                  |
| APPBP2        | ENST00000083182.3 | amyloid beta precursor protein (cytoplasmic tail) binding protein 2          |
| MAPK1         | ENST00000215832.6 | mitogen-activated protein kinase 1                                           |
| IFFO2         | ENST00000455833.2 | intermediate filament family orphan 2                                        |
| FRMD4A        | ENST00000358621.4 | FERM domain containing 4A                                                    |
| KMT2A         | ENST00000534358.1 | lysine (K)-specific methyltransferase 2A                                     |
| DAB1          | ENST00000371236.2 | Dab, reelin signal transducer, homolog 1 (Drosophila)                        |
| TET1          | ENST00000373644.4 | tet methylcytosine dioxygenase 1                                             |
| HIPK2         | ENST00000406875.3 | homeodomain interacting protein kinase 2                                     |
| TCF4          | ENST00000354452.3 | transcription factor 4                                                       |
| DMXL1         | ENST00000311085.8 | Dmx-like 1                                                                   |
| AFF1          | ENST00000395146.4 | AF4/FMR2 family, member 1                                                    |
| YTHDC1        | ENST00000344157.4 | YTH domain containing 1                                                      |
| MAPRE2        | ENST00000436190.2 | microtubule-associated protein, RP/EB family, member 2                       |
| NFYB          | ENST00000240055.3 | nuclear transcription factor Y, beta                                         |
| MPRIP         | ENST00000341712.4 | myosin phosphatase Rho interacting protein                                   |
| UACA          | ENST00000322954.6 | uveal autoantigen with coiled-coil domains and ankyrin repeats               |
| CBX5          | ENST00000209875.4 | chromobox homolog 5                                                          |
| RRP15         | ENST00000366932.3 | ribosomal RNA processing 15 homolog (S. cerevisiae)                          |
| MAGI2         | ENST00000419488.1 | membrane associated guanylate kinase, WW and PDZ domain containing 2         |
| MTSS1         | ENST00000378017.3 | metastasis suppressor 1                                                      |
| CXXC4         | ENST00000394767.2 | CXXC finger protein 4                                                        |
| ESRRG         | ENST00000361525.3 | estrogen-related receptor gamma                                              |
| MED13L        | ENST00000281928.3 | mediator complex subunit 13-like                                             |
| CXADR         | ENST00000356275.6 | coxsackie virus and adenovirus receptor                                      |
| PLCB4         | ENST00000378493.1 | phospholipase C, beta 4                                                      |
| IDE           | ENST00000265986.6 | insulin-degrading enzyme                                                     |
| PBX1          | ENST00000367897.1 | pre-B-cell leukemia homeobox 1                                               |
| CHKA          | ENST00000265689.4 | choline kinase alpha                                                         |
| PLEKHA7       | ENST00000531066.1 | pleckstrin homology domain containing, family A member 7                     |
| RP11-343C2.12 | ENST00000562949.1 | Conserved oligomeric Golgi complex subunit 8                                 |
| WHSC1L1       | ENST00000317025.8 | Wolf-Hirschhorn syndrome candidate 1-like 1                                  |
| SAR1A         | ENST00000373242.2 | SAR1 homolog A (S. cerevisiae)                                               |
| BACE1         | ENST00000313005.6 | beta-site APP-cleaving enzyme 1                                              |
| CLCN5         | ENST00000376088.3 | chloride channel, voltage-sensitive 5                                        |



|          |                   |                                                                           |
|----------|-------------------|---------------------------------------------------------------------------|
| ZNF207   | ENST00000394670.4 | zinc finger protein 207                                                   |
| DCX      | ENST00000356915.2 | doublecortin                                                              |
| ELAVL4   | ENST00000371824.1 | ELAV like neuron-specific RNA binding protein 4                           |
| PDF      | ENST00000288022.1 | peptide deformylase (mitochondrial)                                       |
| SOX5     | ENST00000546136.1 | SRY (sex determining region Y)-box 5                                      |
| FOXN3    | ENST00000345097.4 | forkhead box N3                                                           |
| PLXNA3   | ENST00000369682.3 | plexin A3                                                                 |
| CDS2     | ENST00000460006.1 | CDP-diacylglycerol synthase (phosphatidate cytidyltransferase) 2          |
| B3GALT1  | ENST00000392690.3 | UDP-Gal:betaGlcNAc beta 1,3-galactosyltransferase, polypeptide 1          |
| CUL3     | ENST00000264414.4 | cullin 3                                                                  |
| PHLPP2   | ENST00000568954.1 | PH domain and leucine rich repeat protein phosphatase 2                   |
| THSD7A   | ENST00000423059.4 | thrombospondin, type I, domain containing 7A                              |
| SCN7A    | ENST00000409855.1 | sodium channel, voltage-gated, type VII, alpha subunit                    |
| BEND3    | ENST00000369042.1 | BEN domain containing 3                                                   |
| GPR63    | ENST00000229955.3 | G protein-coupled receptor 63                                             |
| TNKS     | ENST00000310430.6 | tankyrase, TRF1-interacting ankyrin-related ADP-ribose polymerase         |
| FZD4     | ENST00000531380.1 | frizzled family receptor 4                                                |
| WDR26    | ENST00000414423.2 | WD repeat domain 26                                                       |
| NR3C1    | ENST00000394464.2 | nuclear receptor subfamily 3, group C, member 1 (glucocorticoid receptor) |
| COG8     | ENST00000306875.4 | component of oligomeric golgi complex 8                                   |
| TIAM1    | ENST00000286827.3 | T-cell lymphoma invasion and metastasis 1                                 |
| METTL9   | ENST00000358154.3 | methyltransferase like 9                                                  |
| DYNLL2   | ENST00000579991.2 | dynein, light chain, LC8-type 2                                           |
| MYO9A    | ENST00000564571.1 | myosin IXA                                                                |
| FAM84B   | ENST00000304916.3 | family with sequence similarity 84, member B                              |
| CDC42BPB | ENST00000361246.2 | CDC42 binding protein kinase beta (DMPK-like)                             |
| OGFRL1   | ENST00000370435.4 | opioid growth factor receptor-like 1                                      |
| MAP4K4   | ENST00000413150.2 | mitogen-activated protein kinase kinase kinase 4                          |
| NCOA3    | ENST00000341724.6 | nuclear receptor coactivator 3                                            |
| WIPF1    | ENST00000392547.2 | WAS/WASL interacting protein family, member 1                             |
| GNG7     | ENST00000382159.3 | guanine nucleotide binding protein (G protein), gamma 7                   |
| KIAA1958 | ENST00000337530.6 | KIAA1958                                                                  |
| TNIK     | ENST00000436636.2 | TRAF2 and NCK interacting kinase                                          |
| NPC1     | ENST00000269228.5 | Niemann-Pick disease, type C1                                             |
| GAD2     | ENST00000376261.3 | glutamate decarboxylase 2 (pancreatic islets and brain, 65kDa)            |
| DPYSL3   | ENST00000398514.3 | dihydropyrimidinase-like 3                                                |
| ARL5A    | ENST00000295087.8 | ADP-ribosylation factor-like 5A                                           |
| RTN4RL1  | ENST00000331238.6 | reticulon 4 receptor-like 1                                               |
| SPOCK2   | ENST00000373109.2 | sparc/osteonectin, cwcv and kazal-like domains proteoglycan (testican) 2  |
| RAD54L2  | ENST00000409535.2 | RAD54-like 2 ( <i>S. cerevisiae</i> )                                     |
| LGALS1   | ENST00000409537.2 | lectin, galactoside-binding-like                                          |
| ATG7     | ENST00000354449.3 | autophagy related 7                                                       |
| XKR7     | ENST00000562532.2 | XK, Kell blood group complex subunit-related family, member 7             |
| ZNF609   | ENST00000326648.3 | zinc finger protein 609                                                   |
| LMLN     | ENST00000330198.4 | leishmanolysin-like (metallopeptidase M8 family)                          |
| MARCH1   | ENST00000274056.7 | membrane-associated ring finger (C3HC4) 1, E3 ubiquitin protein ligase    |
| SHROOM4  | ENST00000376020.2 | shroom family member 4                                                    |
| TNR      | ENST00000367674.2 | tenascin R                                                                |
| TLN2     | ENST00000561311.1 | talin 2                                                                   |
| DRD2     | ENST00000355319.2 | dopamine receptor D2                                                      |
| POU4F1   | ENST00000377208.5 | POU class 4 homeobox 1                                                    |
| MED20    | ENST00000409312.1 | mediator complex subunit 20                                               |
| VWC2L    | ENST00000427124.1 | von Willebrand factor C domain containing protein 2-like                  |
| MYO5A    | ENST00000399231.3 | myosin VA (heavy chain 12, myosin)                                        |
| TOM1L2   | ENST00000581396.1 | target of myb1-like 2 (chicken)                                           |
| NUFIP2   | ENST00000225388.4 | nuclear fragile X mental retardation protein interacting protein 2        |
| TNRC6C   | ENST00000335749.4 | trinucleotide repeat containing 6C                                        |
| TM9SF4   | ENST00000398022.2 | transmembrane 9 superfamily protein member 4                              |
| MTMR12   | ENST00000280285.5 | myotubularin related protein 12                                           |
| HARBI1   | ENST00000326737.3 | harbinger transposase derived 1                                           |
| HIC2     | ENST00000407464.2 | hypermethylated in cancer 2                                               |
| STX7     | ENST00000367941.2 | syntaxin 7                                                                |
| KMT2C    | ENST00000262189.6 | lysine (K)-specific methyltransferase 2C                                  |
| SEC24A   | ENST00000398844.2 | SEC24 family, member A ( <i>S. cerevisiae</i> )                           |
| SCAF8    | ENST00000367178.3 | SR-related CTD-associated factor 8                                        |
| ZNRF2    | ENST00000323037.4 | zinc and ring finger 2                                                    |

|          |                   |                                                                   |
|----------|-------------------|-------------------------------------------------------------------|
| BBX      | ENST00000415149.2 | bobby sox homolog (Drosophila)                                    |
| TXLNG    | ENST00000380122.5 | taxilin gamma                                                     |
| RNF115   | ENST00000369291.5 | ring finger protein 115                                           |
| SLC14A1  | ENST00000321925.4 | solute carrier family 14 (urea transporter), member 1             |
| NABP1    | ENST00000410026.2 | nucleic acid binding protein 1                                    |
| SOX11    | ENST00000322002.3 | SRY (sex determining region Y)-box 11                             |
| JMJD1C   | ENST00000399251.1 | jumonji domain containing 1C                                      |
| TCF21    | ENST00000367882.4 | transcription factor 21                                           |
| CUL4B    | ENST00000371322.5 | cullin 4B                                                         |
| FBRSL1   | ENST00000434748.2 | fibrosin-like 1                                                   |
| ANKLE2   | ENST00000539605.1 | ankyrin repeat and LEM domain containing 2                        |
| PSMF1    | ENST00000335877.6 | proteasome (prosome, macropain) inhibitor subunit 1 (PI31)        |
| THOC2    | ENST00000245838.8 | THO complex 2                                                     |
| ANK2     | ENST00000357077.4 | ankyrin 2, neuronal                                               |
| SOCS7    | ENST00000577233.1 | suppressor of cytokine signaling 7                                |
| ESCO1    | ENST00000269214.5 | establishment of sister chromatid cohesion N-acetyltransferase 1  |
| DYRK2    | ENST00000344096.3 | dual-specificity tyrosine-(Y)-phosphorylation regulated kinase 2  |
| SCEL     | ENST00000377246.3 | sciellin                                                          |
| SFXN1    | ENST00000321442.5 | sideroflexin 1                                                    |
| VAMP4    | ENST00000236192.7 | vesicle-associated membrane protein 4                             |
| HNRNPR   | ENST00000478691.1 | heterogeneous nuclear ribonucleoprotein R                         |
| ASXL1    | ENST00000375687.4 | additional sex combs like 1 (Drosophila)                          |
| C1orf35  | ENST00000272139.4 | chromosome 1 open reading frame 35                                |
| TTC37    | ENST00000358746.2 | tetratricopeptide repeat domain 37                                |
| PCM1     | ENST00000524226.1 | pericentriolar material 1                                         |
| TRMU     | ENST00000381019.3 | tRNA 5-methylaminomethyl-2-thiouridylate methyltransferase        |
| TRIM13   | ENST00000378182.3 | tripartite motif containing 13                                    |
| GTPBP8   | ENST00000383677.3 | GTP-binding protein 8 (putative)                                  |
| POLR3A   | ENST00000372371.3 | polymerase (RNA) III (DNA directed) polypeptide A, 155kDa         |
| HAUS3    | ENST00000243706.4 | HAUS augmin-like complex, subunit 3                               |
| KIAA1211 | ENST00000504228.1 | KIAA1211                                                          |
| CNP      | ENST00000393892.3 | 2',3'-cyclic nucleotide 3' phosphodiesterase                      |
| SCN9A    | ENST00000409672.1 | sodium channel, voltage-gated, type IX, alpha subunit             |
| CADM1    | ENST00000452722.3 | cell adhesion molecule 1                                          |
| KCNC2    | ENST00000393288.2 | potassium voltage-gated channel, Shaw-related subfamily, member 2 |
| GATSL2   | ENST00000426327.3 | GATS protein-like 2                                               |
| METTL24  | ENST00000338882.4 | methyltransferase like 24                                         |
| PTCHD3   | ENST00000438700.3 | patched domain containing 3                                       |
| APOH     | ENST00000205948.6 | apolipoprotein H (beta-2-glycoprotein I)                          |
| SERPINC1 | ENST00000367698.3 | serpin peptidase inhibitor, clade C (antithrombin), member 1      |
| SPPL2A   | ENST00000261854.5 | signal peptide peptidase like 2A                                  |
| PDHB     | ENST00000474765.1 | pyruvate dehydrogenase (lipoamide) beta                           |
| DNAH17   | ENST00000585328.1 | dynein, axonemal, heavy chain 17                                  |

Supplementary Table 4: Human miR-200c-3p targets predicted by TargetScan

| Target gene | Representative transcript | Gene name                                                                                 |
|-------------|---------------------------|-------------------------------------------------------------------------------------------|
| ZEB1        | ENST00000361642.5         | zinc finger E-box binding homeobox 1                                                      |
| GMBF        | ENST00000554908.1         | glia maturation factor, beta                                                              |
| TCEB1       | ENST00000518127.1         | transcription elongation factor B (SIII), polypeptide 1 (15kDa, elongin C)                |
| FEZ2        | ENST00000379245.4         | fasciculation and elongation protein zeta 2 (zygin II)                                    |
| CFL2        | ENST00000341223.3         | cofilin 2 (muscle)                                                                        |
| LHFP        | ENST00000379589.3         | lipoma HMGIC fusion partner                                                               |
| PMAP1       | ENST00000316660.6         | phorbol-12-myristate-13-acetate-induced protein 1                                         |
| INTS8       | ENST00000523731.1         | integrator complex subunit 8                                                              |
| DZIP1       | ENST00000347108.3         | DAZ interacting zinc finger protein 1                                                     |
| GPM6A       | ENST00000280187.7         | glycoprotein M6A                                                                          |
| AP1S2       | ENST00000329235.2         | adaptor-related protein complex 1, sigma 2 subunit                                        |
| KIAA0101    | ENST00000558008.1         | KIAA0101                                                                                  |
| ZFPM2       | ENST00000407775.2         | zinc finger protein, FOG family member 2                                                  |
| CNPF1R1     | ENST00000562576.1         | CTD nuclear envelope phosphatase 1 regulatory subunit 1                                   |
| SEC23A      | ENST00000537403.1         | Sec23 homolog A (S. cerevisiae)                                                           |
| PPP4R2      | ENST00000356692.5         | protein phosphatase 4, regulatory subunit 2                                               |
| HMGGB3      | ENST00000325307.7         | high mobility group box 3                                                                 |
| NRS2A2      | ENST00000367362.3         | nuclear receptor subfamily 5, group A, member 2                                           |
| ERRF1       | ENST00000377482.5         | ERBB receptor feedback inhibitor 1                                                        |
| APOO        | ENST00000379226.4         | apolipoprotein O                                                                          |
| VASH2       | ENST00000366968.4         | vasohibin 2                                                                               |
| SERPIN11    | ENST00000446050.2         | serpin peptidase inhibitor, clade I (neuroserpin), member 1                               |
| PAPD5       | ENST00000357464.3         | PAP associated domain containing 5                                                        |
| PTH1H       | ENST00000395872.1         | parathyroid hormone-like hormone                                                          |
| RECK        | ENST00000377966.3         | reversion-inducing-cysteine-rich protein with kazal motifs                                |
| TMEFF2      | ENST00000392314.1         | transmembrane protein with EGF-like and two follistatin-like domains 2                    |
| YWHAH       | ENST00000307630.3         | tyrosine 3-monooxygenase/tryptophan 5-monooxygenase activation protein, gamma polypeptide |
| RASSF8      | ENST00000541490.1         | Ras association (RalGDS/AF-6) domain family (N-terminal) member 8                         |
| RAP2C       | ENST00000342983.2         | RAP2C, member of RAS oncogene family                                                      |
| PRKACB      | ENST00000370689.2         | protein kinase, cAMP-dependent, catalytic, beta                                           |
| PTPN21      | ENST00000328736.3         | protein tyrosine phosphatase, non-receptor type 21                                        |
| C16orf52    | ENST00000542527.2         | chromosome 16 open reading frame 52                                                       |
| NOG         | ENST00000332822.4         | noggin                                                                                    |
| MMD         | ENST00000262065.3         | monocyte to macrophage differentiation-associated                                         |
| CNN3        | ENST00000370206.4         | calponin 3, acidic                                                                        |
| IMMP2L      | ENST00000405709.2         | IMP2 inner mitochondrial membrane peptidase-like (S. cerevisiae)                          |
| FLI1        | ENST00000527786.2         | Fli-1 proto-oncogene, ETS transcription factor                                            |
| MCFD2       | ENST00000444761.2         | multiple coagulation factor deficiency 2                                                  |
| CRKL        | ENST00000354336.3         | v-crk avian sarcoma virus CT10 oncogene homolog-like                                      |
| LBR         | ENST00000272163.4         | lamin B receptor                                                                          |
| ELAVL2      | ENST00000380110.4         | ELAV like neuron-specific RNA binding protein 2                                           |
| SESN1       | ENST00000436639.2         | sestrin 1                                                                                 |
| ZEB2        | ENST00000558170.2         | zinc finger E-box binding homeobox 2                                                      |
| YPPEL2      | ENST00000312655.4         | yippee-like 2 (Drosophila)                                                                |
| SMIM5       | ENST00000375215.3         | small integral membrane protein 5                                                         |
| MSN         | ENST00000360270.5         | moesin                                                                                    |
| KDEL1       | ENST00000376004.4         | KDEL (Lys-Asp-Glu-Leu) containing 1                                                       |
| RP6-24A23.6 | ENST00000563887.1         | Uncharacterized protein                                                                   |
| SLC14A1     | ENST00000321925.4         | solute carrier family 14 (urea transporter), member 1                                     |
| PSAT1       | ENST00000376588.3         | phosphoserine aminotransferase 1                                                          |
| RBF3X3      | ENST00000583458.1         | RNA binding protein, fox-1 homolog (C. elegans) 3                                         |
| EPS8        | ENST00000543523.1         | epidermal growth factor receptor pathway substrate 8                                      |
| CEP41       | ENST00000223208.5         | centrosomal protein 41kDa                                                                 |
| MARCKS      | ENST00000368635.4         | myristoylated alanine-rich protein kinase C substrate                                     |
| DNAJB5      | ENST00000545841.1         | DnaJ (Hsp40) homolog, subfamily B, member 5                                               |
| XKR8        | ENST00000373884.5         | XK, Kell blood group complex subunit-related family, member 8                             |
| RANBP10     | ENST00000317506.3         | RAN binding protein 10                                                                    |
| PRDM16      | ENST00000511072.1         | PR domain containing 16                                                                   |
| ZNF532      | ENST00000336078.4         | zinc finger protein 532                                                                   |
| C6orf120    | ENST00000332290.2         | chromosome 6 open reading frame 120                                                       |
| NOVA1       | ENST00000465357.2         | neuro-oncological ventral antigen 1                                                       |
| LPAR1       | ENST00000374431.3         | lysophosphatidic acid receptor 1                                                          |
| USP27X      | ENST00000508866.2         | ubiquitin specific peptidase 27, X-linked                                                 |
| LIN7B       | ENST00000391864.3         | lin-7 homolog B (C. elegans)                                                              |
| B3GNT1      | ENST00000311181.4         | UDP-GlcNAc:betaGal beta-1,3-N-acetylglucosaminyltransferase 1                             |
| LCA5        | ENST00000369846.4         | Leber congenital amaurosis 5                                                              |
| OSTM1       | ENST00000193322.3         | osteopetrosis associated transmembrane protein 1                                          |
| WAPAL       | ENST00000298767.5         | wings apart-like homolog (Drosophila)                                                     |
| PAIP2       | ENST00000394795.2         | poly(A) binding protein interacting protein 2                                             |
| ZNF131      | ENST00000505606.2         | zinc finger protein 131                                                                   |
| NTF3        | ENST00000423158.3         | neurotrophin 3                                                                            |
| CRTAP       | ENST00000320954.6         | cartilage associated protein                                                              |
| CDK17       | ENST00000543119.2         | cyclin-dependent kinase 17                                                                |
| BNC2        | ENST00000380672.4         | basonuclin 2                                                                              |
| SLC35F4     | ENST00000556826.1         | solute carrier family 35, member F4                                                       |
| GIT2        | ENST00000355312.3         | G protein-coupled receptor kinase interacting ArfGAP 2                                    |
| CCDC82      | ENST00000278520.5         | coiled-coil domain containing 82                                                          |
| TCAIM       | ENST00000342649.4         | T cell activation inhibitor, mitochondrial                                                |
| NRG1        | ENST00000341377.5         | neuregulin 1                                                                              |
| ADIPOR2     | ENST00000357103.4         | adiponectin receptor 2                                                                    |
| PPAPDC2     | ENST00000381883.2         | phosphatidic acid phosphatase type 2 domain containing 2                                  |
| ETS1        | ENST00000531611.1         | v-ets avian erythroblastosis virus E26 oncogene homolog 1                                 |
| JHDM1D      | ENST00000397560.2         | jumonji C domain containing histone demethylase 1 homolog D (S. cerevisiae)               |
| FLII        | ENST00000327031.4         | flightless I homolog (Drosophila)                                                         |
| SLIT2       | ENST00000504154.1         | slit homolog 2 (Drosophila)                                                               |
| DUSP1       | ENST00000239223.3         | dual specificity phosphatase 1                                                            |
| CLIC4       | ENST00000374379.4         | chloride intracellular channel 4                                                          |
| TRAPPC8     | ENST00000283351.4         | trafficking protein particle complex 8                                                    |
| FAM118B     | ENST00000533050.1         | family with sequence similarity 118, member B                                             |
| TMEM17      | ENST00000335390.5         | transmembrane protein 17                                                                  |
| SCOC        | ENST00000608372.1         | short coiled-coil protein                                                                 |
| CACUL1      | ENST00000369151.3         | CDK2-associated, cullin domain 1                                                          |
| JUN         | ENST00000371222.2         | jun proto-oncogene                                                                        |
| BAG6        | ENST00000375976.4         | BCL2-associated athanogene 6                                                              |
| C16orf72    | ENST00000327827.7         | chromosome 16 open reading frame 72                                                       |

|              |                   |                                                                                          |
|--------------|-------------------|------------------------------------------------------------------------------------------|
| KIAA0087     | ENST00000242109.3 | KIAA0087                                                                                 |
| SGCE         | ENST00000265735.7 | sarcoglycan, epsilon                                                                     |
| H53ST3A1     | ENST00000284110.1 | heparan sulfate (glucosamine) 3-O-sulfotransferase 3A1                                   |
| GIC1         | ENST00000426548.1 | gap junction protein, gamma 1, 45kDa                                                     |
| SLK          | ENST00000335753.4 | STE20-like kinase                                                                        |
| SULF1        | ENST00000458141.2 | sulfatase 1                                                                              |
| KIAA1432     | ENST00000414202.2 | KIAA1432                                                                                 |
| TFAP2A       | ENST00000379613.3 | transcription factor AP-2 alpha (activating enhancer binding protein 2 alpha)            |
| RANBP9       | ENST0000011619.3  | RAN binding protein 9                                                                    |
| CTD-2510F5.6 | ENST00000577660.1 | Uncharacterized protein                                                                  |
| RIMKLB       | ENST00000357529.3 | ribosomal modification protein rimK-like family member B                                 |
| GATSL2       | ENST00000426327.3 | GATS protein-like 2                                                                      |
| BDP1         | ENST00000380675.2 | B double prime 1, subunit of RNA polymerase III transcription initiation factor IIIB     |
| STRN         | ENST00000263918.4 | striatin, calmodulin binding protein                                                     |
| WASF3        | ENST00000335327.5 | WAS protein family, member 3                                                             |
| FUBP1        | ENST00000370767.1 | far upstream element (FUSE) binding protein 1                                            |
| IER5         | ENST00000367577.4 | immediate early response 5                                                               |
| EFNA1        | ENST00000368407.3 | ephrin-A1                                                                                |
| KLHL14       | ENST00000359358.4 | kelch-like family member 14                                                              |
| LPPR1        | ENST00000374874.3 | Lipid phosphate phosphatase-related protein type 1                                       |
| ZBTB7C       | ENST00000535628.2 | zinc finger and BTB domain containing 7C                                                 |
| PPM1F        | ENST00000263212.5 | protein phosphatase, Mg2+/Mn2+ dependent, 1F                                             |
| UBE2V1       | ENST00000371657.5 | ubiquitin-conjugating enzyme E2 variant 1                                                |
| FBXO30       | ENST00000237281.4 | F-box protein 30                                                                         |
| MMD2         | ENST00000406755.1 | monocyte to macrophage differentiation-associated 2                                      |
| SRSF10       | ENST00000343255.5 | serine/arginine-rich splicing factor 10                                                  |
| AGFG1        | ENST00000310078.8 | ArfGAP with FG repeats 1                                                                 |
| PPP2CA       | ENST00000481195.1 | protein phosphatase 2, catalytic subunit, alpha isozyme                                  |
| IAH1         | ENST00000470914.1 | isoamyl acetate-hydrolyzing esterase 1 homolog (S. cerevisiae)                           |
| GAL3ST1      | ENST00000406955.1 | galactose-3-O-sulfotransferase 1                                                         |
| FUBP3        | ENST00000319725.9 | far upstream element (FUSE) binding protein 3                                            |
| ARLSA        | ENST00000295087.8 | ADP-ribosylation factor-like 5A                                                          |
| ANP32B       | ENST00000339399.4 | acidic (leucine-rich) nuclear phosphoprotein 32 family, member B                         |
| EGLN1        | ENST00000366641.3 | egl-9 family hypoxia-inducible factor 1                                                  |
| TWISTNB      | ENST00000222567.5 | TWIST neighbor                                                                           |
| CEBPD        | ENST00000408965.3 | CCAAT/enhancer binding protein (C/EBP), delta                                            |
| HSPA13       | ENST00000285667.3 | heat shock protein 70kDa family, member 13                                               |
| PCMTD1       | ENST00000360540.5 | protein-L-isoaspartate (D-aspartate) O-methyltransferase domain containing 1             |
| DNMT3B       | ENST00000344505.4 | DNA (cytosine-5)-methyltransferase 3 beta                                                |
| PIGM         | ENST00000368090.2 | phosphatidylinositol glycan anchor biosynthesis, class M                                 |
| GNAQ         | ENST00000286548.4 | guanine nucleotide binding protein (G protein), q polypeptide                            |
| MYB          | ENST00000367814.4 | v-myb avian myeloblastosis viral oncogene homolog                                        |
| CKAP4        | ENST00000378026.4 | cytoskeleton-associated protein 4                                                        |
| RNF2         | ENST00000367510.3 | ring finger protein 2                                                                    |
| UBE2I        | ENST00000355803.4 | ubiquitin-conjugating enzyme E2I                                                         |
| ARHGAP6      | ENST00000380736.1 | Rho GTPase activating protein 6                                                          |
| RHOA         | ENST00000454011.2 | ras homolog family member A                                                              |
| NANOS1       | ENST00000425699.1 | nanos homolog 1 (Drosophila)                                                             |
| MFAP5        | ENST00000359478.2 | microfibrillar associated protein 5                                                      |
| PPAP2B       | ENST00000371250.3 | phosphatidic acid phosphatase type 2B                                                    |
| BAG5         | ENST00000299204.4 | BCL2-associated athanogene 5                                                             |
| RAB37        | ENST00000392610.1 | RAB37, member RAS oncogene family                                                        |
| CHST9        | ENST00000580774.1 | carbohydrate (N-acetylglucosamine 4-O) sulfotransferase 9                                |
| KDR          | ENST00000263923.4 | kinase insert domain receptor (a type III receptor tyrosine kinase)                      |
| FXR2         | ENST00000250113.7 | fragile X mental retardation, autosomal homolog 2                                        |
| H53ST1       | ENST00000002596.5 | heparan sulfate (glucosamine) 3-O-sulfotransferase 1                                     |
| SPTSSA       | ENST00000298130.4 | serine palmitoyltransferase, small subunit A                                             |
| KLFI10       | ENST00000285407.6 | Kruppel-like factor 10                                                                   |
| MIEF1        | ENST00000325301.2 | mitochondrial elongation factor 1                                                        |
| FXR1         | ENST00000357559.4 | fragile X mental retardation, autosomal homolog 1                                        |
| COP58        | ENST00000354371.2 | COP9 signalosome subunit 8                                                               |
| ITMB2        | ENST00000378565.5 | integral membrane protein 2B                                                             |
| FBXW7        | ENST00000281708.4 | F-box and WD repeat domain containing 7, E3 ubiquitin protein ligase                     |
| PALM2        | ENST00000448454.2 | paralemmin 2                                                                             |
| RND3         | ENST00000375734.2 | Rho family GTPase 3                                                                      |
| REV1         | ENST00000393445.3 | REV1, polymerase (DNA directed)                                                          |
| TOB1         | ENST00000499247.2 | transducer of ERBB2, 1                                                                   |
| FBXO33       | ENST00000298097.7 | F-box protein 33                                                                         |
| HDHD2        | ENST00000300605.6 | haloacid dehalogenase-like hydrolase domain containing 2                                 |
| THAP1        | ENST00000345117.2 | THAP domain containing, apoptosis associated protein 1                                   |
| SLC30A5      | ENST00000396591.3 | solute carrier family 30 (zinc transporter), member 5                                    |
| HNRNPD       | ENST00000313899.7 | heterogeneous nuclear ribonucleoprotein D (AU-rich element RNA binding protein 1, 37kDa) |
| MXD3         | ENST00000439742.2 | MAX dimerization protein 3                                                               |
| ZDHC17       | ENST00000426126.2 | zinc finger, DHHC-type containing 17                                                     |
| Cxorf23      | ENST00000379687.3 | chromosome X open reading frame 23                                                       |
| ELL2         | ENST00000237853.4 | elongation factor, RNA polymerase II, 2                                                  |
| PUM2         | ENST00000338086.5 | pumilio RNA-binding family member 2                                                      |
| UBE2W        | ENST00000517608.1 | ubiquitin-conjugating enzyme E2W (putative)                                              |
| CASC4        | ENST00000360824.3 | cancer susceptibility candidate 4                                                        |
| FSCN1        | ENST00000382361.3 | fascin homolog 1, actin-bundling protein (Strongylocentrotus purpuratus)                 |
| NFIB         | ENST00000397575.3 | nuclear factor I/B                                                                       |
| NDN          | ENST00000331837.4 | neccdin, melanoma antigen (MAGE) family member                                           |
| ARGL11       | ENST00000400198.3 | arginine and glutamate rich 1                                                            |
| SNX30        | ENST00000374232.3 | sorting nexin family member 30                                                           |
| GNPDA1       | ENST00000311337.6 | glucosamine-6-phosphate deaminase 1                                                      |
| PPP1R18      | ENST00000399199.3 | protein phosphatase 1, regulatory subunit 18                                             |
| MAPRE1       | ENST00000375571.5 | microtubule-associated protein, RP/EB family, member 1                                   |
| CNTRF        | ENST00000351266.4 | ciliary neurotrophic factor receptor                                                     |
| BTF3L4       | ENST00000489308.2 | basic transcription factor 3-like 4                                                      |
| FLJ20373     | ENST00000414004.2 |                                                                                          |
| PSPH         | ENST00000275605.3 | phosphoserine phosphatase                                                                |
| WDR91        | ENST00000344400.5 | WD repeat domain 91                                                                      |
| HSPA9        | ENST00000297185.3 | heat shock 70kDa protein 9 (mortalin)                                                    |
| ZCCHC24      | ENST00000372336.3 | zinc finger, CCHC domain containing 24                                                   |
| BAP1         | ENST00000460680.1 | BRCA1 associated protein-1 (ubiquitin carboxy-terminal hydrolase)                        |
| CLASP1       | ENST00000409078.3 | cytoplasmic linker associated protein 1                                                  |
| DGKA         | ENST00000551156.1 | diacylglycerol kinase, alpha 80kDa                                                       |
| NFIA         | ENST00000403491.3 | nuclear factor I/A                                                                       |

|                |                   |                                                                                                                                                                            |
|----------------|-------------------|----------------------------------------------------------------------------------------------------------------------------------------------------------------------------|
| SIX1           | ENST00000247182.6 | SIX homeobox 1                                                                                                                                                             |
| NLGN4X         | ENST00000381095.3 | neuroligin 4, X-linked                                                                                                                                                     |
| TSC22D1        | ENST00000458659.2 | TSC22 domain family, member 1                                                                                                                                              |
| DCBLD2         | ENST00000326840.6 | discoidin, CUB and LCLL domain containing 2                                                                                                                                |
| PFDN4          | ENST00000371419.2 | prefoldin subunit 4                                                                                                                                                        |
| CNOT7          | ENST00000361272.4 | CCR4-NOT transcription complex, subunit 7                                                                                                                                  |
| PSIP1          | ENST00000380738.4 | PC4 and SFRS1 interacting protein 1                                                                                                                                        |
| SEMA6D         | ENST00000355997.3 | sema domain, transmembrane domain (TM), and cytoplasmic domain, (semaphorin) 6D                                                                                            |
| HMBOX1         | ENST00000397358.3 | homeobox containing 1                                                                                                                                                      |
| FOXG1          | ENST00000382535.3 | forkhead box G1                                                                                                                                                            |
| TMCC1          | ENST00000432054.2 | transmembrane and coiled-coil domain family 1                                                                                                                              |
| TMEM189-UBE2V1 | ENST00000341698.2 | TMEM189-UBE2V1 readthrough                                                                                                                                                 |
| RSPRY1         | ENST00000394420.4 | ring finger and SPRY domain containing 1                                                                                                                                   |
| SPATS2L        | ENST00000358677.5 | spermatogenesis associated, serine-rich 2-like                                                                                                                             |
| SCHIP1         | ENST00000445224.2 | schwannomin interacting protein 1                                                                                                                                          |
| TMEM189        | ENST00000557021.1 | transmembrane protein 189                                                                                                                                                  |
| SOX2           | ENST00000325404.1 | SRY (sex determining region Y)-box 2                                                                                                                                       |
| KIAA1430       | ENST00000458385.2 | KIAA1430                                                                                                                                                                   |
| SGIP1          | ENST00000371036.3 | SH3-domain GRB2-like (endophilin) interacting protein 1                                                                                                                    |
| LOX            | ENST00000231004.4 | lysyl oxidase                                                                                                                                                              |
| TMEM33         | ENST00000504986.1 | transmembrane protein 33                                                                                                                                                   |
| DNAJC3         | ENST00000602402.1 | DnaJ (Hsp40) homolog, subfamily C, member 3                                                                                                                                |
| TSC22D2        | ENST00000361875.3 | TSC22 domain family, member 2                                                                                                                                              |
| FAM49B         | ENST00000519824.2 | family with sequence similarity 49, member B                                                                                                                               |
| ARID4B         | ENST00000349213.3 | AT rich interactive domain 4B (RBP1-like)                                                                                                                                  |
| PCDH8          | ENST00000377942.3 | protocadherin 8                                                                                                                                                            |
| SMARCAD1       | ENST00000354268.4 | SWI/SNF-related, matrix-associated actin-dependent regulator of chromatin, subfamily a, containing DEAD/H box 1                                                            |
| GATA4          | ENST00000335135.4 | GATA binding protein 4                                                                                                                                                     |
| BASP1          | ENST00000322611.3 | brain abundant, membrane attached signal protein 1                                                                                                                         |
| SURF4          | ENST00000545297.1 | surfeit 4                                                                                                                                                                  |
| NC51           | ENST00000372398.3 | neuronal calcium sensor 1                                                                                                                                                  |
| MAP3K5         | ENST00000359015.4 | mitogen-activated protein kinase kinase 5                                                                                                                                  |
| NXPH1          | ENST00000405863.1 | neurexophilin 1                                                                                                                                                            |
| SPG20          | ENST00000438666.2 | spastic paraplegia 20 (Troyer syndrome)                                                                                                                                    |
| GOLGA7         | ENST00000405786.2 | golgin A7                                                                                                                                                                  |
| PKIA           | ENST00000396418.2 | protein kinase (cAMP-dependent, catalytic) inhibitor alpha                                                                                                                 |
| SCD            | ENST00000370355.2 | stearoyl-CoA desaturase (delta-9-desaturase)                                                                                                                               |
| SOX1           | ENST00000330949.1 | SRY (sex determining region Y)-box 1                                                                                                                                       |
| VTI1B          | ENST00000554659.1 | vesicle transport through interaction with t-SNAREs 1B                                                                                                                     |
| IDS            | ENST00000422081.2 | Iduronate 2-sulfatase (Hunter syndrome), isoform CRA_e; Iduronate 2-sulfatase 14 kDa chain; cDNA FLI42669 fis, clone BRAMY2022168, highly similar to IDURONATE 2-SULFATASE |
| MYLK           | ENST00000360772.3 | myosin light chain kinase                                                                                                                                                  |
| KLF6           | ENST00000542957.1 | Kruppel-like factor 6                                                                                                                                                      |
| FSTL1          | ENST00000295633.3 | folliculin-like 1                                                                                                                                                          |
| MBNL3          | ENST00000370839.3 | muscleblind-like splicing regulator 3                                                                                                                                      |
| SLC35E2B       | ENST00000378662.1 | solute carrier family 35, member E2B                                                                                                                                       |
| ZBTB8A         | ENST00000316459.4 | zinc finger and BTB domain containing 8A                                                                                                                                   |
| ENSA           | ENST00000369014.5 | endosulfine alpha                                                                                                                                                          |
| MTRF1          | ENST00000458689.2 | mitochondrial fission regulator 1                                                                                                                                          |
| ARHGEF3        | ENST00000296315.3 | Rho guanine nucleotide exchange factor (GEF) 3                                                                                                                             |
| MEX3B          | ENST00000558133.1 | mex-3 RNA binding family member B                                                                                                                                          |
| XKR6           | ENST00000304437.2 | XK, Kell blood group complex subunit-related family, member 6                                                                                                              |
| COL4A3BP       | ENST00000380494.5 | collagen, type IV, alpha 3 (Goodpasture antigen) binding protein                                                                                                           |
| NUDT4          | ENST00000337179.5 | nudix (nucleoside diphosphate linked moiety X)-type motif 4                                                                                                                |
| SERINC1        | ENST00000339697.4 | serine incorporator 1                                                                                                                                                      |
| SSR3           | ENST00000476217.1 | signal sequence receptor, gamma (translocon-associated protein gamma)                                                                                                      |
| EVI5           | ENST00000370331.1 | ecotropic viral integration site 5                                                                                                                                         |
| IKBK           | ENST00000379708.3 | inhibitor of kappa light polypeptide gene enhancer in B-cells, kinase beta                                                                                                 |
| E2F3           | ENST00000346618.3 | E2F transcription factor 3                                                                                                                                                 |
| GRAP2          | ENST00000344138.4 | GRB2-related adaptor protein 2                                                                                                                                             |
| NEGR1          | ENST00000357731.5 | neuronal growth regulator 1                                                                                                                                                |
| ADAMTS3        | ENST00000286657.4 | ADAM metalloproteinase with thrombospondin type 1 motif, 3                                                                                                                 |
| LMO7           | ENST00000341547.4 | LIM domain 7                                                                                                                                                               |
| IQCJ-SCHIP1    | ENST00000337808.6 | IQCJ-SCHIP1 readthrough                                                                                                                                                    |
| KLF4           | ENST00000374672.4 | Kruppel-like factor 4 (gut)                                                                                                                                                |
| MBLAC2         | ENST00000316610.6 | metallo-beta-lactamase domain containing 2                                                                                                                                 |
| ORMDL3         | ENST00000304046.2 | ORM1-like 3 (S. cerevisiae)                                                                                                                                                |
| TMEM170B       | ENST00000379426.1 | transmembrane protein 170B                                                                                                                                                 |
| NBR1           | ENST00000542611.1 | neighbor of BRCA1 gene 1                                                                                                                                                   |
| TMEM237        | ENST00000409444.2 | transmembrane protein 237                                                                                                                                                  |
| KIAA0040       | ENST00000423313.1 | KIAA0040                                                                                                                                                                   |
| AMOTL2         | ENST00000249883.5 | angiominin like 2                                                                                                                                                          |
| ARIH1          | ENST00000379887.4 | ariadne RBR E3 ubiquitin protein ligase 1                                                                                                                                  |
| GXYLT1         | ENST00000398675.3 | glucoside xylosyltransferase 1                                                                                                                                             |
| CHRD1L         | ENST00000372045.1 | chordin-like 1                                                                                                                                                             |
| LRP1B          | ENST00000389484.3 | low density lipoprotein receptor-related protein 1B                                                                                                                        |
| PAM            | ENST00000438793.3 | peptidylglycine alpha-amidating monooxygenase                                                                                                                              |
| TMEM170A       | ENST00000357613.4 | transmembrane protein 170A                                                                                                                                                 |
| PLS3           | ENST00000420625.2 | plastin 3                                                                                                                                                                  |
| RBM12B         | ENST00000399300.2 | RNA binding motif protein 12B                                                                                                                                              |
| LFNG           | ENST00000402045.1 | LFNG O-fucosylpeptide 3-beta-N-acetylglucosaminyltransferase                                                                                                               |
| CSRNP3         | ENST00000314499.7 | cysteine-serine-rich nuclear protein 3                                                                                                                                     |
| SNAI2          | ENST0000020945.1  | snail family zinc finger 2                                                                                                                                                 |
| CITFD2         | ENST00000367651.2 | Cbp/p300-interacting transactivator, with Glu/Asp-rich carboxy-terminal domain, 2                                                                                          |
| SYDE1          | ENST00000342784.2 | synapse defective 1, Rho GTPase, homolog 1 (C. elegans)                                                                                                                    |
| PHACTR3        | ENST00000359926.3 | phosphatase and actin regulator 3                                                                                                                                          |
| CCSER1         | ENST00000509176.1 | coiled-coil serine-rich protein 1                                                                                                                                          |
| DIRAS2         | ENST00000375765.3 | DIRAS family, GTP-binding RAS-like 2                                                                                                                                       |
| UBE2D1         | ENST00000373910.4 | ubiquitin-conjugating enzyme E2D 1                                                                                                                                         |
| TRIM33         | ENST00000358465.2 | tripartite motif containing 33                                                                                                                                             |
| CALU           | ENST00000535011.2 | calumenin                                                                                                                                                                  |
| BHLHE41        | ENST00000242728.4 | basic helix-loop-helix family, member e41                                                                                                                                  |
| LARP1B         | ENST00000441387.1 | La ribonucleoprotein domain family, member 1B                                                                                                                              |
| MTSS1L         | ENST00000338779.6 | metastasis suppressor 1-like                                                                                                                                               |
| ACVR1C         | ENST00000243349.8 | activin A receptor, type IC                                                                                                                                                |
| ELF2           | ENST00000394235.2 | E74-like factor 2 (ets domain transcription factor)                                                                                                                        |
| KLF12          | ENST00000377669.2 | Kruppel-like factor 12                                                                                                                                                     |
| TAF12          | ENST00000373824.4 | TAF12 RNA polymerase II, TATA box binding protein (TBP)-associated factor, 20kDa                                                                                           |
| RHOT1          | ENST00000333942.6 | ras homolog family member T1                                                                                                                                               |

|           |                   |                                                                                              |
|-----------|-------------------|----------------------------------------------------------------------------------------------|
| SRSF1     | ENST00000258962.4 | serine/arginine-rich splicing factor 1                                                       |
| CORO1C    | ENST00000261401.3 | coronin, actin binding protein, 1C                                                           |
| TBK1      | ENST00000331710.5 | TANK-binding kinase 1                                                                        |
| ARHGAP19  | ENST00000358531.4 | Rho GTPase activating protein 19                                                             |
| SLITRK1   | ENST00000377084.2 | SLIT and NTRK-like family, member 1                                                          |
| PCSK2     | ENST00000377899.1 | proprotein convertase subtilisin/kexin type 2                                                |
| SLC39A14  | ENST00000381237.1 | solute carrier family 39 (zinc transporter), member 14                                       |
| MXD4      | ENST00000337190.2 | MAX dimerization protein 4                                                                   |
| TAOK3     | ENST00000419821.2 | TAO kinase 3                                                                                 |
| ACE2      | ENST00000252519.3 | angiotensin I converting enzyme 2                                                            |
| SELK      | ENST00000541726.1 | Selenoprotein K                                                                              |
| PLCL1     | ENST00000428675.1 | phospholipase C-like 1                                                                       |
| RUSC2     | ENST00000455600.1 | RUN and SH3 domain containing 2                                                              |
| RAB11FIP2 | ENST00000355624.3 | RAB11 family interacting protein 2 (class I)                                                 |
| PHF6      | ENST00000332070.3 | PHD finger protein 6                                                                         |
| ZNF423    | ENST00000561648.1 | zinc finger protein 423                                                                      |
| VEGFA     | ENST00000417285.2 | vascular endothelial growth factor A                                                         |
| NREP      | ENST00000379671.3 | neuronal regeneration related protein                                                        |
| KIF13A    | ENST00000378814.5 | kinesin family member 13A                                                                    |
| TLL2      | ENST00000357947.3 | tollid-like 2                                                                                |
| DNAJC5    | ENST00000360864.4 | DnaJ (Hsp40) homolog, subfamily C, member 5                                                  |
| GLI3      | ENST00000395925.3 | GLI family zinc finger 3                                                                     |
| FN1       | ENST00000357009.2 | fibronectin 1                                                                                |
| SCR2T     | ENST00000246104.6 | scratch homolog 2, zinc finger protein (Drosophila)                                          |
| KBTD6     | ENST00000379485.1 | kelch repeat and BTB (POZ) domain containing 6                                               |
| TTC33     | ENST00000337702.4 | tetratricopeptide repeat domain 33                                                           |
| CDH11     | ENST00000394156.3 | cadherin 11, type 2, OB-cadherin (osteoblast)                                                |
| S100BP    | ENST00000373475.5 | S100P binding protein                                                                        |
| CNKS3     | ENST00000607772.1 | CNKS family member 3                                                                         |
| BAZ2B     | ENST00000392782.1 | bromodomain adjacent to zinc finger domain, 2B                                               |
| FHOD1     | ENST00000258201.4 | formin homology 2 domain containing 1                                                        |
| MSL2      | ENST00000309993.2 | male-specific lethal 2 homolog (Drosophila)                                                  |
| HNRNPH1   | ENST00000393432.4 | heterogeneous nuclear ribonucleoprotein H1 (H)                                               |
| HS2ST1    | ENST00000370550.5 | heparan sulfate 2-O-sulfotransferase 1                                                       |
| MBOAT2    | ENST00000305997.3 | membrane bound O-acyltransferase domain containing 2                                         |
| SLC16A2   | ENST00000587091.1 | solute carrier family 16, member 2 (thyroid hormone transporter)                             |
| FBXL17    | ENST00000359660.5 | F-box and leucine-rich repeat protein 17                                                     |
| FNB4      | ENST00000263773.5 | formin binding protein 4                                                                     |
| SCAMP1    | ENST00000538629.1 | secretory carrier membrane protein 1                                                         |
| MAP4K3    | ENST00000263881.3 | mitogen-activated protein kinase kinase kinase kinase 3                                      |
| HNRNPU    | ENST00000444376.2 | heterogeneous nuclear ribonucleoprotein U (scaffold attachment factor A)                     |
| PRKAR1A   | ENST00000589228.1 | protein kinase, cAMP-dependent, regulatory, type I, alpha                                    |
| SECISBP2L | ENST00000559471.1 | SECIS binding protein 2-like                                                                 |
| TMEM229B  | ENST00000557006.1 | transmembrane protein 229B                                                                   |
| FAM219A   | ENST00000379089.1 | family with sequence similarity 219, member A                                                |
| LRP4      | ENST00000378623.1 | low density lipoprotein receptor-related protein 4                                           |
| PDIK1L    | ENST00000374271.4 | PDLIM1 interacting kinase 1 like                                                             |
| RELN      | ENST00000428762.1 | reelin                                                                                       |
| KHDRBS1   | ENST00000327300.7 | KH domain containing, RNA binding, signal transduction associated 1                          |
| LMAN1     | ENST00000251047.5 | lectin, mannose-binding, 1                                                                   |
| GPR158    | ENST00000376351.3 | G protein-coupled receptor 158                                                               |
| PPP6R3    | ENST00000393800.2 | protein phosphatase 6, regulatory subunit 3                                                  |
| NFYA      | ENST00000341376.6 | nuclear transcription factor Y, alpha                                                        |
| OCLN      | ENST00000355237.2 | occludin                                                                                     |
| PHF21B    | ENST00000403565.1 | PHD finger protein 21B                                                                       |
| KIAA0895  | ENST00000297063.6 | KIAA0895                                                                                     |
| KIAA2018  | ENST00000316407.4 | KIAA2018                                                                                     |
| MMP16     | ENST00000286614.6 | matrix metalloproteinase 16 (membrane-inserted)                                              |
| OSBPL11   | ENST00000296220.5 | oxysterol binding protein-like 11                                                            |
| FRMD4B    | ENST00000398540.3 | FERM domain containing 4B                                                                    |
| WIPF3     | ENST00000409290.1 | WAS/WASL interacting protein family, member 3                                                |
| NCOA2     | ENST00000452400.2 | nuclear receptor coactivator 2                                                               |
| RAB18     | ENST00000356940.6 | RAB18, member RAS oncogene family                                                            |
| ARL6IP6   | ENST00000326446.5 | ADP-ribosylation-like factor 6 interacting protein 6                                         |
| UGT1      | ENST00000310528.8 | SGT1, suppressor of G2 allele of SKP1 (S. cerevisiae)                                        |
| PPP2R5E   | ENST00000337537.3 | protein phosphatase 2, regulatory subunit B', epsilon isoform                                |
| CYTH1     | ENST00000585509.1 | cytohesin 1                                                                                  |
| C11orf87  | ENST00000327419.6 | chromosome 11 open reading frame 87                                                          |
| CUL4A     | ENST00000326335.4 | cullin 4A                                                                                    |
| VCP1P1    | ENST00000310421.4 | valosin containing protein (p97)/p47 complex interacting protein 1                           |
| FLT1      | ENST00000282397.4 | fms-related tyrosine kinase 1                                                                |
| ZBTB12    | ENST00000375527.2 | zinc finger and BTB domain containing 12                                                     |
| FRS2      | ENST00000550389.1 | fibroblast growth factor receptor substrate 2                                                |
| ZC3H6     | ENST00000343936.4 | zinc finger CCH-type containing 6                                                            |
| ARIH2     | ENST00000356401.4 | ariadne RBR E3 ubiquitin protein ligase 2                                                    |
| PTPN11    | ENST00000351677.2 | protein tyrosine phosphatase, non-receptor type 11                                           |
| CDYL      | ENST00000343762.5 | chromodomain protein, Y-like                                                                 |
| KANK1     | ENST00000382303.1 | KN motif and ankyrin repeat domains 1                                                        |
| USP6NL    | ENST00000609104.1 | USP6 N-terminal like                                                                         |
| PLCXD3    | ENST00000377801.3 | phosphatidylinositol-specific phospholipase C, X domain containing 3                         |
| TIMP2     | ENST00000585421.1 | TIMP metalloproteinase inhibitor 2                                                           |
| ELMOD2    | ENST00000323570.3 | ELMO/CE2-12 domain containing 2                                                              |
| DHX36     | ENST00000496811.1 | DEAH (Asp-Glu-Ala-His) box polypeptide 36                                                    |
| UBA6      | ENST00000322244.5 | ubiquitin-like modifier activating enzyme 6                                                  |
| ZNF771    | ENST00000319296.5 | zinc finger protein 771                                                                      |
| VTI1A     | ENST00000393077.2 | vesicle transport through interaction with t-SNAREs 1A                                       |
| DDX26B    | ENST00000370752.4 | DEAD/H (Asp-Glu-Ala-Asp/His) box polypeptide 26B                                             |
| AMFR      | ENST00000290649.5 | autocrine motility factor receptor, E3 ubiquitin protein ligase                              |
| PTGDR     | ENST00000553372.1 | prostaglandin D2 receptor (DP)                                                               |
| ETS2      | ENST00000360214.3 | v-ets avian erythroblastosis virus E26 oncogene homolog 2                                    |
| GNAI3     | ENST00000369851.4 | guanine nucleotide binding protein (G protein), alpha inhibiting activity polypeptide 3      |
| ZNF292    | ENST00000369577.3 | zinc finger protein 292                                                                      |
| PTPN13    | ENST00000436978.1 | protein tyrosine phosphatase, non-receptor type 13 (APO-1/CD95 (Fas)-associated phosphatase) |
| MTF2      | ENST00000370298.4 | metal response element binding transcription factor 2                                        |
| PBX3      | ENST00000342287.5 | pre-B-cell leukemia homeobox 3                                                               |
| RIMS2     | ENST00000507740.1 | regulating synaptic membrane exocytosis 2                                                    |
| TAF1D     | ENST00000448108.2 | TATA box binding protein (TBP)-associated factor, RNA polymerase I, D, 41kDa                 |
| EFNB2     | ENST00000245323.4 | eprhin-B2                                                                                    |

|             |                    |                                                                                                               |
|-------------|--------------------|---------------------------------------------------------------------------------------------------------------|
| ZBTB38      | ENST00000514251.1  | zinc finger and BTB domain containing 38                                                                      |
| SYT1        | ENST00000457153.2  | synaptotagmin I                                                                                               |
| DCAF17      | ENST00000375255.3  | DDB1 and CUL4 associated factor 17                                                                            |
| PTPN14      | ENST00000366956.5  | protein tyrosine phosphatase, non-receptor type 14                                                            |
| R3HDM2      | ENST00000347140.3  | R3H domain containing 2                                                                                       |
| CPE1D       | ENST00000310396.5  | cadherin-like and PC-esterase domain containing 1                                                             |
| KRAS        | ENST00000256078.4  | Kirsten rat sarcoma viral oncogene homolog                                                                    |
| DUSP7       | ENST00000495880.1  | dual specificity phosphatase 7                                                                                |
| BMI1        | ENST00000376663.3  | BMI1 polycomb ring finger oncogene                                                                            |
| CNTN4       | ENST00000427331.1  | contactin 4                                                                                                   |
| FIGN        | ENST00000333129.3  | fidgetin                                                                                                      |
| RTF1        | ENST00000389629.4  | Rtf1, Paf1/RNA polymerase II complex component, homolog (S. cerevisiae)                                       |
| ZNF711      | ENST00000360700.4  | zinc finger protein 711                                                                                       |
| ATL2        | ENST00000406122.1  | atlastin GTPase 2                                                                                             |
| RSRC2       | ENST00000331738.7  | arginine/serine-rich coiled-coil 2                                                                            |
| DIXDC1      | ENST00000440460.2  | DIX domain containing 1                                                                                       |
| AC068987.1  | ENST00000599343.1  | HCG1997999; cDNA FLJ33996 fis, clone DFNES2008881                                                             |
| RAC1        | ENST00000348035.4  | ras-related C3 botulinum toxin substrate 1 (rho family, small GTP binding protein Rac1)                       |
| PPP1R10     | ENST00000376511.2  | protein phosphatase 1, regulatory subunit 10                                                                  |
| DACH1       | ENST00000305425.4  | dachshund homolog 1 (Drosophila)                                                                              |
| BICC1       | ENST00000373886.3  | bicaudal C homolog 1 (Drosophila)                                                                             |
| PTBP1       | ENST00000350092.4  | polypyrimidine tract binding protein 1                                                                        |
| ZMAT3       | ENST00000311417.2  | zinc finger, matrin-type 3                                                                                    |
| VLDLR       | ENST00000382100.3  | very low density lipoprotein receptor                                                                         |
| SLC1A2      | ENST00000278379.3  | solute carrier family 1 (glial high affinity glutamate transporter), member 2                                 |
| CBX4        | ENST00000269397.4  | chromobox homolog 4                                                                                           |
| SMAD2       | ENST00000262160.6  | SMAD family member 2                                                                                          |
| KLF9        | ENST00000377126.2  | Kruppel-like factor 9                                                                                         |
| HOXA5       | ENST00000227276.3  | homeobox A5                                                                                                   |
| KMT2E       | ENST00000334877.4  | lysine (K)-specific methyltransferase 2E                                                                      |
| CHD2        | ENST00000394196.4  | chromodomain helicase DNA binding protein 2                                                                   |
| CSNK1G3     | ENST00000360683.2  | casein kinase 1, gamma 3                                                                                      |
| PDS5B       | ENST00000315596.10 | PDS5, regulator of cohesion maintenance, homolog B (S. cerevisiae)                                            |
| QKI         | ENST00000392127.2  | QKI, KH domain containing, RNA binding                                                                        |
| ADCY2       | ENST00000338316.4  | adenylate cyclase 2 (brain)                                                                                   |
| DR1         | ENST00000370272.4  | down-regulator of transcription 1, TBP-binding (negative cofactor 2)                                          |
| CDR2        | ENST00000268383.2  | cerebellar degeneration-related protein 2, 62kDa                                                              |
| CDC73       | ENST00000367435.3  | cell division cycle 73                                                                                        |
| GPR107      | ENST00000372410.3  | G protein-coupled receptor 107                                                                                |
| NPTX1       | ENST00000306773.4  | neuronal pentraxin I                                                                                          |
| GATA2       | ENST00000341105.2  | GATA binding protein 2                                                                                        |
| CNOT4       | ENST00000541284.1  | CCR4-NOT transcription complex, subunit 4                                                                     |
| ETV5        | ENST00000306376.5  | ets variant 5                                                                                                 |
| GBX2        | ENST00000551105.1  | gastrulation brain homeobox 2                                                                                 |
| SLC24A4     | ENST00000393265.2  | solute carrier family 24 (sodium/potassium/calcium exchanger), member 4                                       |
| DNMT3A      | ENST00000380746.4  | DNA (cytosine-5--methyltransferase 3 alpha                                                                    |
| DLGAP2      | ENST00000421627.2  | discs, large (Drosophila) homolog-associated protein 2                                                        |
| ATXN1       | ENST00000244769.4  | ataxin 1                                                                                                      |
| MED13       | ENST00000397786.2  | mediator complex subunit 13                                                                                   |
| PHTF2       | ENST00000416283.2  | putative homeodomain transcription factor 2                                                                   |
| ZNF217      | ENST00000371471.2  | zinc finger protein 217                                                                                       |
| ZNF280C     | ENST00000370978.4  | zinc finger protein 280C                                                                                      |
| RPE         | ENST00000429907.1  | ribulose-5-phosphate-3-epimerase                                                                              |
| CCNA2       | ENST00000274026.5  | cyclin A2                                                                                                     |
| NOVA2       | ENST00000263257.5  | neuro-oncological ventral antigen 2                                                                           |
| ANKH        | ENST00000284268.6  | ANKH inorganic pyrophosphate transport regulator                                                              |
| PAR6B       | ENST00000371610.2  | par-6 family cell polarity regulator beta                                                                     |
| NPC1        | ENST00000269228.5  | Niemann-Pick disease, type C1                                                                                 |
| FAM60A      | ENST00000539409.1  | family with sequence similarity 60, member A                                                                  |
| THRA        | ENST00000450525.2  | thyroid hormone receptor, alpha                                                                               |
| COMMD3-BMI1 | ENST00000602390.1  | COMMD3-BMI1 readthrough                                                                                       |
| KIAA1456    | ENST00000524591.2  | KIAA1456                                                                                                      |
| DOT1L       | ENST00000398665.3  | DOT1-like histone H3K79 methyltransferase                                                                     |
| ZBTB5       | ENST00000307750.4  | zinc finger and BTB domain containing 5                                                                       |
| FUT4        | ENST00000358752.2  | fucosyltransferase 4 (alpha (1,3) fucosyltransferase, myeloid-specific)                                       |
| CCDC177     | ENST00000599174.1  | Homo sapiens coiled-coil domain containing 177 (CCDC177), mRNA.                                               |
| NCOA7       | ENST00000392477.2  | nuclear receptor coactivator 7                                                                                |
| MATR3       | ENST00000510056.1  | matrin 3                                                                                                      |
| FOXN2       | ENST00000340553.3  | forkhead box N2                                                                                               |
| PIP4K2B     | ENST00000269554.3  | phosphatidylinositol-5-phosphate 4-kinase, type II, beta                                                      |
| LRRTM3      | ENST00000361320.4  | leucine rich repeat transmembrane neuronal 3                                                                  |
| SYVN1       | ENST00000294256.8  | synovial apoptosis inhibitor 1, synoviolin                                                                    |
| GALNT2      | ENST00000366672.4  | UDP-N-acetyl-alpha-D-galactosamine:polypeptide N-acetylgalactosaminyltransferase 2 (GalNAc-T2)                |
| PIK3CB      | ENST00000477593.1  | phosphatidylinositol-4,5-bisphosphate 3-kinase, catalytic subunit beta                                        |
| CYP1B1      | ENST00000260630.3  | cytochrome P450, family 1, subfamily B, polypeptide 1                                                         |
| WDR45B      | ENST00000392325.4  | WD repeat domain 45B                                                                                          |
| DCUN1D1     | ENST00000292782.4  | DCN1, defective in cullin neddylation 1, domain containing 1                                                  |
| ZNF697      | ENST00000421812.2  | zinc finger protein 697                                                                                       |
| KCND2       | ENST00000331113.4  | potassium voltage-gated channel, Shal-related subfamily, member 2                                             |
| WWC3        | ENST00000380861.4  | WWC family member 3                                                                                           |
| CDYL2       | ENST00000570137.2  | chromodomain protein, Y-like 2                                                                                |
| GLIPR2      | ENST00000396613.3  | GLI pathogenesis-related 2                                                                                    |
| PHF21A      | ENST00000257821.4  | PHD finger protein 21A                                                                                        |
| PAG1        | ENST00000220597.4  | phosphoprotein associated with glycosphingolipid microdomains 1                                               |
| PVRL4       | ENST00000368012.3  | poliovirus receptor-related 4                                                                                 |
| ZC3H15      | ENST00000337859.6  | zinc finger CCHC-type containing 15                                                                           |
| UNC119B     | ENST00000344651.4  | unc-119 homolog B (C. elegans)                                                                                |
| CDR2L       | ENST00000337231.5  | cerebellar degeneration-related protein 2-like                                                                |
| NEK9        | ENST00000238616.5  | NIMA-related kinase 9                                                                                         |
| CAMSAP2     | ENST00000358823.2  | calmodulin regulated spectrin-associated protein family, member 2                                             |
| TRIM62      | ENST00000291416.5  | tripartite motif containing 62                                                                                |
| UGCG        | ENST00000374279.3  | UDP-glucose ceramide glucosyltransferase                                                                      |
| INHBA       | ENST00000242208.4  | inhibin, beta A                                                                                               |
| SPAST       | ENST00000315285.3  | spastin                                                                                                       |
| ST6GALNAC5  | ENST00000477717.1  | ST6 (alpha-N-acetyl-neuraminyl-2,3-beta-galactosyl-1,3)-N-acetylgalactosaminide alpha-2,6-sialyltransferase 5 |
| PHLDB1      | ENST00000361417.2  | pleckstrin homology-like domain, family B, member 1                                                           |
| TUBB3       | ENST00000315491.7  | Tubulin beta-3 chain                                                                                          |
| CECR2       | ENST00000400573.5  | cat eye syndrome chromosome region, candidate 2                                                               |

|            |                   |                                                                                           |
|------------|-------------------|-------------------------------------------------------------------------------------------|
| PPP2R2C    | ENST00000335585.5 | protein phosphatase 2, regulatory subunit B, gamma                                        |
| ARRDC3     | ENST00000265138.3 | arrestin domain containing 3                                                              |
| PTP4A1     | ENST00000370651.3 | protein tyrosine phosphatase type IVA, member 1                                           |
| GABPA      | ENST00000354828.3 | GA binding protein transcription factor, alpha subunit 60kDa                              |
| TBC1D22B   | ENST00000373491.3 | TBC1 domain family, member 22B                                                            |
| CTNND2     | ENST00000304623.8 | catenin (cadherin-associated protein), delta 2                                            |
| YWHAQ      | ENST00000381844.4 | tyrosine 3-monooxygenase/tryptophan 5-monooxygenase activation protein, theta polypeptide |
| TLN2       | ENST00000561311.1 | talin 2                                                                                   |
| WBP1L      | ENST00000369889.4 | WW domain binding protein 1-like                                                          |
| TTC5       | ENST00000258821.3 | tetratricopeptide repeat domain 5                                                         |
| PRDM1      | ENST00000369089.3 | PR domain containing 1, with ZNF domain                                                   |
| NCOA3      | ENST00000341724.6 | nuclear receptor coactivator 3                                                            |
| THSD7A     | ENST00000423059.4 | thrombospondin, type I, domain containing 7A                                              |
| GABBR2     | ENST00000259455.2 | gamma-aminobutyric acid (GABA) B receptor, 2                                              |
| PIP4K2A    | ENST00000376573.4 | phosphatidylinositol-5-phosphate 4-kinase, type II, alpha                                 |
| SPAG9      | ENST00000262013.7 | sperm associated antigen 9                                                                |
| GPR173     | ENST00000332582.4 | G protein-coupled receptor 173                                                            |
| ANKRD28    | ENST00000399451.2 | ankyrin repeat domain 28                                                                  |
| ARID4A     | ENST00000431317.2 | AT rich interactive domain 4A (RBP1-like)                                                 |
| GOLGA1     | ENST00000373555.4 | golgin A1                                                                                 |
| AFF3       | ENST00000409236.2 | AF4/FMR2 family, member 3                                                                 |
| PEAK1      | ENST00000312493.4 | pseudopodium-enriched atypical kinase 1                                                   |
| GPATCH8    | ENST00000591680.1 | G patch domain containing 8                                                               |
| HOOK1      | ENST00000371208.3 | hook microtubule-tethering protein 1                                                      |
| REEP1      | ENST00000165698.5 | receptor accessory protein 1                                                              |
| WDR82      | ENST00000296490.3 | WD repeat domain 82                                                                       |
| NEK10      | ENST00000295720.6 | NIMA-related kinase 10                                                                    |
| ZFAND5     | ENST00000237937.3 | zinc finger, AN1-type domain 5                                                            |
| CACNA1C    | ENST00000399655.1 | calcium channel, voltage-dependent, L type, alpha 1C subunit                              |
| C10orf118  | ENST00000543782.1 | chromosome 10 open reading frame 118                                                      |
| PDPK1      | ENST00000441549.3 | 3-phosphoinositide dependent protein kinase-1                                             |
| SBSPO1     | ENST00000297354.6 | somatomedin B and thrombospondin, type 1 domain containing                                |
| PPP1R9B    | ENST00000316878.6 | protein phosphatase 1, regulatory subunit 9B                                              |
| ATP11C     | ENST00000327569.3 | ATPase, class VI, type 11C                                                                |
| CHST2      | ENST00000309575.3 | carbohydrate (N-acetylglucosamine-6-O) sulfotransferase 2                                 |
| CLIP1      | ENST00000361654.4 | CAP-GLY domain containing linker protein 1                                                |
| PPFIBP1    | ENST00000318304.8 | PTPRF interacting protein, binding protein 1 (liprin beta 1)                              |
| STARD13    | ENST00000336934.5 | StAR-related lipid transfer (START) domain containing 13                                  |
| ZMYM4      | ENST00000314607.6 | zinc finger, MYM-type 4                                                                   |
| XIAP       | ENST00000371199.3 | X-linked inhibitor of apoptosis                                                           |
| UBQLN1     | ENST00000376395.4 | ubiquitin 1                                                                               |
| FAM19A5    | ENST00000358295.5 | family with sequence similarity 19 (chemokine (C-C motif)-like), member A5                |
| SDK2       | ENST00000392650.3 | sidekick cell adhesion molecule 2                                                         |
| PCSK5      | ENST00000376752.4 | proprotein convertase subtilisin/kexin type 5                                             |
| FERMT2     | ENST00000395631.2 | fermitin family member 2                                                                  |
| C7orf43    | ENST00000394035.2 | chromosome 7 open reading frame 43                                                        |
| APAF1      | ENST00000333991.1 | apoptotic peptidase activating factor 1                                                   |
| SMAD9      | ENST00000399275.2 | SMAD family member 9                                                                      |
| HIPK1      | ENST00000369558.1 | homeodomain interacting protein kinase 1                                                  |
| KCNDB3     | ENST00000369697.1 | potassium voltage-gated channel, Shal-related subfamily, member 3                         |
| OXR1       | ENST00000312046.6 | oxidation resistance 1                                                                    |
| EGR3       | ENST00000519492.1 | early growth response 3                                                                   |
| DOCK4      | ENST00000428084.1 | dedicator of cytokinesis 4                                                                |
| MAP3K1     | ENST00000399503.3 | mitogen-activated protein kinase kinase kinase 1, E3 ubiquitin protein ligase             |
| DLC1       | ENST00000276297.4 | deleted in liver cancer 1                                                                 |
| MARCH8     | ENST00000453424.2 | membrane-associated ring finger (C3HC4) 8, E3 ubiquitin protein ligase                    |
| CASR       | ENST00000498619.1 | calcium-sensing receptor                                                                  |
| WASF1      | ENST00000392587.2 | WAS protein family, member 1                                                              |
| KIAA1462   | ENST00000375377.1 | KIAA1462                                                                                  |
| KANK2      | ENST00000586659.1 | KN motif and ankyrin repeat domains 2                                                     |
| SOX5       | ENST00000546136.1 | SRY (sex determining region Y)-box 5                                                      |
| SCN3B      | ENST00000392770.2 | sodium channel, voltage-gated, type III, beta subunit                                     |
| CHSY1      | ENST00000254190.3 | chondroitin sulfate synthase 1                                                            |
| ARL14EPL   | ENST00000601302.2 | ADP-ribosylation factor-like 14 effector protein-like                                     |
| SHC1       | ENST00000368445.5 | SHC (Src homology 2 domain containing) transforming protein 1                             |
| CASZ1      | ENST00000377022.3 | castor zinc finger 1                                                                      |
| FGD1       | ENST00000375135.3 | FYVE, RhoGEF and PH domain containing 1                                                   |
| TBX5       | ENST00000349716.5 | T-box 5                                                                                   |
| G6orf62    | ENST00000378119.4 | chromosome 6 open reading frame 62                                                        |
| SCN1A      | ENST00000423058.2 | sodium channel, voltage-gated, type I, alpha subunit                                      |
| DES1       | ENST00000263256.6 | desumoylating isopeptidase 1                                                              |
| SLC4A7     | ENST00000295736.5 | solute carrier family 4, sodium bicarbonate cotransporter, member 7                       |
| STRN3      | ENST00000355683.5 | striatin, calmodulin binding protein 3                                                    |
| HSPE1-MOB4 | ENST00000604458.1 | HSPE1-MOB4 readthrough                                                                    |
| CNST       | ENST00000366513.4 | consortin, connexin sorting protein                                                       |
| RBM26      | ENST00000267229.7 | RNA binding motif protein 26                                                              |
| GF11       | ENST00000370332.1 | growth factor independent 1 transcription repressor                                       |
| FYN        | ENST00000368682.3 | FYN oncogene related to SRC, FGR, YES                                                     |
| WDFY3      | ENST00000322366.6 | WD repeat and FYVE domain containing 3                                                    |
| ERG        | ENST00000398905.1 | v-ets avian erythroblastosis virus E26 oncogene homolog                                   |
| SH3GL1     | ENST00000269886.3 | SH3-domain GRB2-like 1                                                                    |
| ARHGAP20   | ENST00000260283.4 | Rho GTPase activating protein 20                                                          |
| CACNA2D1   | ENST00000356860.3 | calcium channel, voltage-dependent, alpha 2/delta subunit 1                               |
| ULK2       | ENST00000395544.4 | unc-51 like autophagy activating kinase 2                                                 |
| PTCH1      | ENST00000430669.2 | patched 1                                                                                 |
| CHD1       | ENST00000284049.3 | chromodomain helicase DNA binding protein 1                                               |
| PAK7       | ENST00000378423.1 | p21 protein (Cdc42/Rac)-activated kinase 7                                                |
| SMURF2     | ENST00000262435.9 | SMAD specific E3 ubiquitin protein ligase 2                                               |
| CNOT6      | ENST00000393356.1 | CCR4-NOT transcription complex, subunit 6                                                 |
| TP53INP1   | ENST00000448464.2 | tumor protein p53 inducible nuclear protein 1                                             |
| TXLNG      | ENST00000380122.5 | taxilin gamma                                                                             |
| ZNF662     | ENST00000541208.1 | zinc finger protein 662                                                                   |
| TMEM164    | ENST00000372073.1 | transmembrane protein 164                                                                 |
| PPP1R12B   | ENST00000608999.1 | protein phosphatase 1, regulatory subunit 12B                                             |
| ZDHHC18    | ENST00000374142.4 | zinc finger, DHHC-type containing 18                                                      |
| CDX4       | ENST00000373514.2 | caudal type homeobox 4                                                                    |
| CPT1A      | ENST00000265641.5 | carnitine palmitoyltransferase 1A (liver)                                                 |
| PPP1CB     | ENST00000395366.2 | protein phosphatase 1, catalytic subunit, beta isozyme                                    |



|          |                   |                                                                                                   |
|----------|-------------------|---------------------------------------------------------------------------------------------------|
| ICK      | ENST00000350082.5 | intestinal cell (MAK-like) kinase                                                                 |
| TENM1    | ENST00000371130.3 | teneurin transmembrane protein 1                                                                  |
| PRKG1    | ENST00000373985.1 | protein kinase, cGMP-dependent, type I                                                            |
| SRP72    | ENST00000342756.5 | signal recognition particle 72kDa                                                                 |
| JAZF1    | ENST00000283928.5 | JAZF zinc finger 1                                                                                |
| FMR1     | ENST00000370471.3 | fragile X mental retardation 1                                                                    |
| RBM20    | ENST00000369519.3 | RNA binding motif protein 20                                                                      |
| DACT1    | ENST00000395153.3 | dishevelled-binding antagonist of beta-catenin 1                                                  |
| MAP2     | ENST00000360351.4 | microtubule-associated protein 2                                                                  |
| NR3C1    | ENST00000394464.2 | nuclear receptor subfamily 3, group C, member 1 (glucocorticoid receptor)                         |
| FOXC1    | ENST00000328914.4 | forkhead box K1                                                                                   |
| CALHM1   | ENST00000329905.5 | calcium homeostasis modulator 1                                                                   |
| GOLIM4   | ENST00000470487.1 | golgi integral membrane protein 4                                                                 |
| ZBTB16   | ENST00000335953.4 | zinc finger and BTB domain containing 16                                                          |
| ACTR1A   | ENST00000487599.1 | ARP1 actin-related protein 1 homolog A, cactractin alpha (yeast)                                  |
| NKAP     | ENST00000371410.3 | NFKB activating protein                                                                           |
| FOSL2    | ENST00000379619.1 | FOS-like antigen 2                                                                                |
| SLC38A4  | ENST00000447411.1 | solute carrier family 38, member 4                                                                |
| ABAT     | ENST00000569156.1 | 4-aminobutyrate aminotransferase                                                                  |
| BPTF     | ENST00000321892.4 | bromodomain PHD finger transcription factor                                                       |
| CLASP2   | ENST00000539981.1 | cytoplasmic linker associated protein 2                                                           |
| KIAA1468 | ENST00000398130.2 | KIAA1468                                                                                          |
| SCN8A    | ENST00000354534.6 | sodium channel, voltage gated, type VIII, alpha subunit                                           |
| RNF38    | ENST00000259605.6 | ring finger protein 38                                                                            |
| HAS2     | ENST00000303924.4 | hyaluronan synthase 2                                                                             |
| NCMAP    | ENST00000374392.2 | noncompact myelin associated protein                                                              |
| PI4KB    | ENST00000368874.4 | phosphatidylinositol 4-kinase, catalytic, beta                                                    |
| SBF1     | ENST00000380817.3 | SET binding factor 1                                                                              |
| AKT2     | ENST00000392038.2 | v-akt murine thymoma viral oncogene homolog 2                                                     |
| PFN2     | ENST00000239940.7 | profilin 2                                                                                        |
| SMARCD1  | ENST00000394963.4 | SWI/SNF related, matrix associated, actin dependent regulator of chromatin, subfamily d, member 1 |
| KATNAL1  | ENST00000380615.3 | katanin p60 subunit A-like 1                                                                      |
| XKR4     | ENST00000327381.6 | XK, Kell blood group complex subunit-related family, member 4                                     |
| KPK1     | ENST00000367324.3 | plakophilin 1 (ectodermal dysplasia/skin fragility syndrome)                                      |
| KCNJ15   | ENST00000328656.4 | potassium inwardly-rectifying channel, subfamily J, member 15                                     |
| RLF      | ENST00000372771.4 | rearranged L-myc fusion                                                                           |
| RFRMD6   | ENST00000395718.2 | FERM domain containing 6                                                                          |
| BCL11B   | ENST00000357195.3 | B-cell CLL/lymphoma 11B (zinc finger protein)                                                     |
| HNF1B    | ENST00000225893.4 | HNF1 homeobox B                                                                                   |
| ZNF362   | ENST00000539719.1 | zinc finger protein 362                                                                           |
| ITSN1    | ENST00000379960.5 | intersectin 1 (SH3 domain protein)                                                                |
| RLIM     | ENST00000332687.6 | ring finger protein, LIM domain interacting                                                       |
| PKD1     | ENST00000262304.4 | polycystic kidney disease 1 (autosomal dominant)                                                  |
| INPP4A   | ENST00000409016.4 | inositol polyphosphate-4-phosphatase, type I, 107kDa                                              |
| ESRP1    | ENST00000358397.5 | epithelial splicing regulatory protein 1                                                          |
| MFHAS1   | ENST00000276282.6 | malignant fibrous histiocytoma amplified sequence 1                                               |
| LRR8A    | ENST00000372600.4 | leucine rich repeat containing 8 family, member A                                                 |
| RP56K2   | ENST00000265678.4 | ribosomal protein S6 kinase, 90kDa, polypeptide 2                                                 |
| LHX9     | ENST00000367390.3 | LIM homeobox 9                                                                                    |
| DENND5B  | ENST00000389082.5 | DENN/MADD domain containing 5B                                                                    |
| OSR1     | ENST00000272223.2 | odd-skipped related 1 (Drosophila)                                                                |
| MIER3    | ENST00000381226.3 | mesoderm induction early response 1, family member 3                                              |
| NUDT3    | ENST00000607016.1 | nudix (nucleoside diphosphate linked moiety X)-type motif 3                                       |
| RAB23    | ENST00000317483.3 | RAB23, member RAS oncogene family                                                                 |
| LEPROTL1 | ENST00000321250.8 | leptin receptor overlapping transcript-like 1                                                     |
| TIAL1    | ENST00000369093.2 | TIA1 cytototoxic granule-associated RNA binding protein-like 1                                    |
| HCN1     | ENST00000303230.4 | hyperpolarization activated cyclic nucleotide-gated potassium channel 1                           |
| SRSF2    | ENST00000392485.2 | serine/arginine-rich splicing factor 2                                                            |
| CDC42EP3 | ENST00000295324.3 | CDC42 effector protein (Rho GTPase binding) 3                                                     |
| HCCS     | ENST00000321143.4 | holocytochrome c synthase                                                                         |
| RBFOX1   | ENST00000355637.4 | RNA binding protein, fox-1 homolog (C. elegans) 1                                                 |
| SFXN1    | ENST00000321442.5 | sideroflexin 1                                                                                    |
| EXOC6B   | ENST00000272427.6 | exocyst complex component 6B                                                                      |
| GAN      | ENST00000568107.2 | gigaxonin                                                                                         |
| RALGPS2  | ENST00000367635.3 | Ral GEF with PH domain and SH3 binding motif 2                                                    |
| CSMD3    | ENST00000343508.3 | CUB and Sushi multiple domains 3                                                                  |
| YOD1     | ENST00000315927.4 | YOD1 deubiquitinase                                                                               |
| NRIP1    | ENST00000400199.1 | nuclear receptor interacting protein 1                                                            |
| ANK3     | ENST00000280772.2 | ankyrin 3, node of Ranvier (ankyrin G)                                                            |
| HNRNPK   | ENST00000376281.4 | heterogeneous nuclear ribonucleoprotein K                                                         |
| SYNJ1    | ENST00000357345.3 | synaptojanin 1                                                                                    |
| TMX4     | ENST00000246024.2 | thioredoxin-related transmembrane protein 4                                                       |
| IGSF3    | ENST00000369486.3 | immunoglobulin superfamily, member 3                                                              |
| COL4A3   | ENST00000396578.3 | collagen, type IV, alpha 3 (Goodpasture antigen)                                                  |
| BACH2    | ENST00000257749.4 | BTB and CNC homology 1, basic leucine zipper transcription factor 2                               |
| CREB5    | ENST00000357727.2 | cAMP responsive element binding protein 5                                                         |
| UBN2     | ENST00000473989.3 | ubiquitin 2                                                                                       |
| SOAT1    | ENST00000367619.3 | sterol O-acyltransferase 1                                                                        |
| EFNA5    | ENST00000333274.6 | ephrin-A5                                                                                         |
| IGF2R    | ENST00000356956.1 | insulin-like growth factor 2 receptor                                                             |
| ESRRG    | ENST00000361525.3 | estrogen-related receptor gamma                                                                   |
| ATP2A2   | ENST00000395494.2 | ATPase, Ca++ transporting, cardiac muscle, slow twitch 2                                          |
| FAM168B  | ENST00000409185.1 | family with sequence similarity 168, member B                                                     |
| DCAF5    | ENST00000341516.5 | DDB1 and CUL4 associated factor 5                                                                 |
| WDR12    | ENST00000261015.4 | WD repeat domain 12                                                                               |
| MYT1     | ENST00000328439.1 | myelin transcription factor 1                                                                     |
| NPNT     | ENST00000379987.2 | nephronectin                                                                                      |
| DDX3Y    | ENST00000336079.3 | DEAD (Asp-Glu-Ala-Asp) box helicase 3, Y-linked                                                   |
| TP73     | ENST00000378280.1 | tumor protein p73                                                                                 |
| MOSPD2   | ENST00000380492.3 | motile sperm domain containing 2                                                                  |
| DNAJB14  | ENST00000442697.2 | DnaJ (Hsp40) homolog, subfamily B, member 14                                                      |
| TRIO     | ENST00000344204.4 | trio Rho guanine nucleotide exchange factor                                                       |
| SLC38A2  | ENST00000256689.5 | solute carrier family 38, member 2                                                                |
| TRIM2    | ENST00000338700.5 | tripartite motif containing 2                                                                     |
| GDI2     | ENST00000380191.4 | GDP dissociation inhibitor 2                                                                      |
| DPY19L1  | ENST00000310974.4 | dpy-19-like 1 (C. elegans)                                                                        |
| DCDC2    | ENST00000378450.3 | doublecortin domain containing 2                                                                  |
| PTEN     | ENST00000371953.3 | phosphatase and tensin homolog                                                                    |

|             |                   |                                                                                 |
|-------------|-------------------|---------------------------------------------------------------------------------|
| KCNB1       | ENST00000371741.4 | potassium voltage-gated channel, Shab-related subfamily, member 1               |
| IMPAD1      | ENST00000262644.4 | inositol monophosphatase domain containing 1                                    |
| RUNX1T1     | ENST00000523629.1 | runx-related transcription factor 1; translocated to, 1 (cyclin D-related)      |
| GREM2       | ENST00000318160.4 | gremlin 2, DAN family BMP antagonist                                            |
| SLC23A2     | ENST00000338244.1 | solute carrier family 23 (ascorbic acid transporter), member 2                  |
| TMEM245     | ENST00000374586.3 | transmembrane protein 245                                                       |
| TEC         | ENST00000381501.3 | tec protein tyrosine kinase                                                     |
| NGEF        | ENST00000264051.3 | neuronal guanine nucleotide exchange factor                                     |
| EIF4E3      | ENST00000425534.3 | eukaryotic translation initiation factor 4E family member 3                     |
| CYTH3       | ENST00000350796.3 | cytohesin 3                                                                     |
| LYSM3       | ENST00000509384.1 | LysM, putative peptidoglycan-binding, domain containing 3                       |
| FSTL4       | ENST00000265342.7 | folliculin-like 4                                                               |
| SHROOM4     | ENST00000376020.2 | shroom family member 4                                                          |
| MBD5        | ENST00000407073.1 | methyl-CpG binding domain protein 5                                             |
| NAPB        | ENST00000377026.4 | N-ethylmaleimide-sensitive factor attachment protein, beta                      |
| SEC61A2     | ENST00000379020.4 | Sec61 alpha 2 subunit (S. cerevisiae)                                           |
| SRGAP1      | ENST00000355086.3 | SLIT-ROBO Rho GTPase activating protein 1                                       |
| CASK        | ENST00000421587.2 | calcium/calmodulin-dependent serine protein kinase (MAGUK family)               |
| LCOR        | ENST00000371103.3 | ligand dependent nuclear receptor corepressor                                   |
| RAB4A       | ENST00000366690.4 | RAB4A, member RAS oncogene family                                               |
| STX1A       | ENST00000395156.3 | syntaxin 1A (brain)                                                             |
| FAM107B     | ENST00000378470.1 | family with sequence similarity 107, member B                                   |
| DAG1        | ENST00000515359.2 | dystroglycan 1 (dystrophin-associated glycoprotein 1)                           |
| OTUD4       | ENST00000454497.2 | OTU domain containing 4                                                         |
| TOR1AIP1    | ENST00000606911.2 | torsin A interacting protein 1                                                  |
| KLHL3       | ENST00000541417.1 | kelch-like family member 3                                                      |
| CGGBP1      | ENST00000309534.6 | CGG triplet repeat binding protein 1                                            |
| YME1L1      | ENST00000326799.3 | YME1-like 1 ATPase                                                              |
| ATP11B      | ENST00000323116.5 | ATPase, class VI, type 11B                                                      |
| SLC2A3      | ENST00000075120.7 | solute carrier family 2 (facilitated glucose transporter), member 3             |
| IFIT5       | ENST00000371795.4 | interferon-induced protein with tetratricopeptide repeats 5                     |
| TEAD1       | ENST00000361905.4 | TEA domain family member 1 (SV40 transcriptional enhancer factor)               |
| PHF16       | ENST00000397189.1 | PHD finger protein 16                                                           |
| NUMB        | ENST00000554546.1 | numb homolog (Drosophila)                                                       |
| NAB1        | ENST00000337386.5 | NGFI-A binding protein 1 (EGR1 binding protein 1)                               |
| SPATA2      | ENST00000289431.5 | spermatogenesis associated 2                                                    |
| ELK4        | ENST00000357992.4 | ELK4, ETS-domain protein (SRF accessory protein 1)                              |
| SEC24A      | ENST00000398844.2 | SEC24 family, member A (S. cerevisiae)                                          |
| WNK3        | ENST00000375169.3 | WNK lysine deficient protein kinase 3                                           |
| CACHD1      | ENST00000371073.2 | cache domain containing 1                                                       |
| GDF6        | ENST00000287020.5 | growth differentiation factor 6                                                 |
| CEP85L      | ENST00000368491.3 | centrosomal protein 85kDa-like                                                  |
| ASH1L       | ENST00000368346.3 | ash1 (absent, small, or homeotic)-like (Drosophila)                             |
| LPPR4       | ENST00000370185.3 | Lipid phosphate phosphatase-related protein type 4                              |
| WIPF1       | ENST00000392547.2 | WAS/WASL interacting protein family, member 1                                   |
| RPS6KA3     | ENST00000379565.3 | ribosomal protein S6 kinase, 90kDa, polypeptide 3                               |
| RAPGEF1     | ENST00000372189.3 | Rap guanine nucleotide exchange factor (GEF) 1                                  |
| RAB8B       | ENST00000321437.4 | RAB8B, member RAS oncogene family                                               |
| NCAM1       | ENST00000316851.7 | neural cell adhesion molecule 1                                                 |
| PLEKHM3     | ENST00000427836.2 | pleckstrin homology domain containing, family M, member 3                       |
| ZNF652      | ENST00000362063.2 | zinc finger protein 652                                                         |
| MAPK1IP1L   | ENST00000395468.4 | mitogen-activated protein kinase 1 interacting protein 1-like                   |
| SNTB2       | ENST00000336278.4 | syntrophin, beta 2 (dystrophin-associated protein A1, 59kDa, basic component 2) |
| BRWD1       | ENST00000342449.3 | bromodomain and WD repeat domain containing 1                                   |
| MED1        | ENST00000300651.6 | mediator complex subunit 1                                                      |
| PPP6C       | ENST00000373547.4 | protein phosphatase 6, catalytic subunit                                        |
| ERLIN1      | ENST00000421367.2 | ER lipid raft associated 1                                                      |
| ASAP1       | ENST00000357668.1 | ArfGAP with SH3 domain, ankyrin repeat and PH domain 1                          |
| KRT80       | ENST00000313234.5 | keratin 80                                                                      |
| ZNF365      | ENST00000395254.3 | zinc finger protein 365                                                         |
| FARP1       | ENST00000595437.1 | FERM, RhoGEF (ARHGEF) and pleckstrin domain protein 1 (chondrocyte-derived)     |
| ZNF281      | ENST00000294740.3 | zinc finger protein 281                                                         |
| GPC6        | ENST00000377047.4 | glypican 6                                                                      |
| HEG1        | ENST00000311127.4 | heart development protein with EGF-like domains 1                               |
| LIMK1       | ENST00000418310.1 | LIM domain kinase 1                                                             |
| GABRB3      | ENST00000311550.5 | gamma-aminobutyric acid (GABA) A receptor, beta 3                               |
| ANGEL2      | ENST00000535388.1 | angel homolog 2 (Drosophila)                                                    |
| RNF24       | ENST00000336095.6 | ring finger protein 24                                                          |
| SYNJ2BP     | ENST00000256366.4 | synaptotagmin 2 binding protein                                                 |
| NFASC       | ENST00000401399.1 | neurofascin                                                                     |
| FBXW11      | ENST00000296933.6 | F-box and WD repeat domain containing 11                                        |
| DENND2C     | ENST00000393276.3 | DENN/MADD domain containing 2C                                                  |
| AKAP2       | ENST00000374525.1 | A kinase (PRKA) anchor protein 2                                                |
| KSR1        | ENST00000398988.3 | kinase suppressor of ras 1                                                      |
| KDM1B       | ENST00000388870.2 | lysine (K)-specific demethylase 1B                                              |
| ELAVL4      | ENST00000371824.1 | ELAV like neuron-specific RNA binding protein 4                                 |
| ZFX         | ENST00000539115.1 | zinc finger protein, X-linked                                                   |
| NOTCH1      | ENST00000277541.6 | notch 1                                                                         |
| AAK1        | ENST00000409085.4 | AP2 associated kinase 1                                                         |
| CENJL       | ENST00000393977.3 | cyclin J-like                                                                   |
| NDNF        | ENST00000379692.4 | neuron-derived neurotrophic factor                                              |
| CEP97       | ENST00000341893.3 | centrosomal protein 97kDa                                                       |
| CHMP5       | ENST00000419016.2 | charged multivesicular body protein 5                                           |
| TCF4        | ENST00000354452.3 | transcription factor 4                                                          |
| AFF4        | ENST00000265343.5 | AF4/FMR2 family, member 4                                                       |
| GPRIN3      | ENST00000609438.1 | GPRIN family member 3                                                           |
| BCL2        | ENST00000398117.1 | B-cell CLL/lymphoma 2                                                           |
| FND3B       | ENST00000336824.4 | fibronectin type III domain containing 3B                                       |
| GRIP1       | ENST00000398016.3 | glutamate receptor interacting protein 1                                        |
| SLCSA3      | ENST00000608209.1 | sodium/myo-inositol cotransporter                                               |
| PLK2        | ENST00000274289.3 | polo-like kinase 2                                                              |
| CLOCK       | ENST00000309964.4 | clock circadian regulator                                                       |
| THRB        | ENST00000396671.2 | thyroid hormone receptor, beta                                                  |
| RFK7        | ENST00000423270.1 | regulatory factor X, 7                                                          |
| AHNAK       | ENST00000378024.4 | AHNAK nucleoprotein                                                             |
| RAB3B       | ENST00000371655.3 | RAB3B, member RAS oncogene family                                               |
| ANGPTL3     | ENST00000371129.3 | angiopoietin-like 3                                                             |
| PALM2-AKAP2 | ENST00000374530.3 | PALM2-AKAP2 readthrough                                                         |

|          |                   |                                                                                  |
|----------|-------------------|----------------------------------------------------------------------------------|
| ST8SIA3  | ENST00000324000.3 | ST8 alpha-N-acetyl-neuraminide alpha-2,8-sialyltransferase 3                     |
| NACC2    | ENST00000371753.1 | NACC family member 2, BEN and BTB (POZ) domain containing                        |
| ANOS     | ENST00000324559.8 | anoctamin 5                                                                      |
| STYX     | ENST00000354586.4 | serine/threonine/tyrosine interacting protein                                    |
| DHX9     | ENST00000367549.3 | DEAH (Asp-Glu-Ala-His) box helicase 9                                            |
| ROCK2    | ENST00000315872.6 | Rho-associated, coiled-coil containing protein kinase 2                          |
| NR2C2    | ENST00000425241.1 | nuclear receptor subfamily 2, group C, member 2                                  |
| MPRIP    | ENST00000341712.4 | myosin phosphatase Rho interacting protein                                       |
| CDC27    | ENST00000066544.3 | cell division cycle 27                                                           |
| AUTS2    | ENST00000342771.4 | autism susceptibility candidate 2                                                |
| NUP153   | ENST00000262077.2 | nucleoporin 153kDa                                                               |
| SLC2A14  | ENST00000340749.5 | solute carrier family 2 (facilitated glucose transporter), member 14             |
| FBXL16   | ENST00000397621.1 | F-box and leucine-rich repeat protein 16                                         |
| RIMS3    | ENST00000372684.3 | regulating synaptic membrane exocytosis 3                                        |
| ETF1     | ENST00000499810.2 | eukaryotic translation termination factor 1                                      |
| PRPF38B  | ENST00000370025.4 | pre-mRNA processing factor 38B                                                   |
| ANOG     | ENST00000320560.8 | anoctamin 6                                                                      |
| PITPNM3  | ENST00000421306.3 | PITPNM family member 3                                                           |
| CAND1    | ENST00000545606.1 | cullin-associated and neddylation-dissociated 1                                  |
| ARHGDI4  | ENST00000269321.7 | Rho GDP dissociation inhibitor (GDI) alpha                                       |
| FRMD4A   | ENST00000358621.4 | FERM domain containing 4A                                                        |
| KRR1     | ENST00000229214.4 | KRR1, small subunit (SSU) processome component, homolog (yeast)                  |
| MAFG     | ENST00000357736.4 | v-maf avian musculoaponeurotic fibrosarcoma oncogene homolog G                   |
| ERN1     | ENST00000433197.3 | endoplasmic reticulum to nucleus signaling 1                                     |
| CDH7     | ENST00000397968.2 | cadherin 7, type 2                                                               |
| MYO9A    | ENST00000564571.1 | myosin IXA                                                                       |
| SLC30A10 | ENST00000366926.3 | solute carrier family 30, member 10                                              |
| KIF26B   | ENST00000366518.4 | kinesin family member 26B                                                        |
| MKL2     | ENST00000318282.5 | MKL/myocardin-like 2                                                             |
| SEPH51   | ENST00000545675.1 | selenophosphate synthetase 1                                                     |
| AGO2     | ENST00000220592.5 | argonate RISC catalytic component 2                                              |
| ZBTB8B   | ENST00000609129.1 | zinc finger and BTB domain containing 8B                                         |
| CELF1    | ENST00000395290.2 | CUGBP, Elav-like family member 1                                                 |
| C1orf131 | ENST00000318906.2 | chromosome 1 open reading frame 131                                              |
| ATXN1L   | ENST00000427980.2 | ataxin 1-like                                                                    |
| LATS2    | ENST00000382592.4 | large tumor suppressor kinase 2                                                  |
| PARD3B   | ENST00000406610.2 | par-3 family cell polarity regulator beta                                        |
| FAM63B   | ENST00000559228.1 | family with sequence similarity 63, member B                                     |
| SORT1    | ENST00000256637.6 | sortilin 1                                                                       |
| PTAR1    | ENST00000377200.5 | protein prenyltransferase alpha subunit repeat containing 1                      |
| ERGIC2   | ENST00000360150.4 | ERGIC and golgi 2                                                                |
| CTBP2    | ENST00000337195.5 | C-terminal binding protein 2                                                     |
| PLXNA2   | ENST00000367033.3 | plexin A2                                                                        |
| GDNF     | ENST00000326524.2 | glial cell derived neurotrophic factor                                           |
| PLXNA4   | ENST00000321063.4 | plexin A4                                                                        |
| GNA13    | ENST00000439174.2 | guanine nucleotide binding protein (G protein), alpha 13                         |
| KIAA0430 | ENST00000396368.3 | KIAA0430                                                                         |
| A1CF     | ENST00000374001.2 | APOBEC1 complementation factor                                                   |
| SLC4A4   | ENST00000340595.3 | solute carrier family 4 (sodium bicarbonate cotransporter), member 4             |
| MCC      | ENST00000302475.4 | mutated in colorectal cancers                                                    |
| MAF      | ENST00000393350.1 | v-maf avian musculoaponeurotic fibrosarcoma oncogene homolog                     |
| TAF4     | ENST00000252996.4 | TAF4 RNA polymerase II, TATA box binding protein (TBP)-associated factor, 135kDa |
| BRWD3    | ENST00000373275.4 | bromodomain and WD repeat domain containing 3                                    |
| CDK12    | ENST00000447079.4 | cyclin-dependent kinase 12                                                       |
| ZCCHC14  | ENST00000268616.4 | zinc finger, CCHC domain containing 14                                           |
| CBX5     | ENST00000209875.4 | chromobox homolog 5                                                              |
| ZNF516   | ENST00000443185.2 | zinc finger protein 516                                                          |
| ABCA1    | ENST00000374736.3 | ATP-binding cassette, sub-family A (ABC1), member 1                              |
| ERBB4    | ENST00000342788.4 | v-erb-b2 avian erythroblastic leukemia viral oncogene homolog 4                  |
| ARHGEF1  | ENST00000347545.4 | Rho guanine nucleotide exchange factor (GEF) 1                                   |
| EMB      | ENST00000303221.5 | embigin                                                                          |
| ZNF395   | ENST00000344423.5 | zinc finger protein 395                                                          |
| LIG1     | ENST00000273261.3 | leucine-rich repeats and immunoglobulin-like domains 1                           |
| HIVEP3   | ENST00000372583.1 | human immunodeficiency virus type I enhancer binding protein 3                   |
| SH3PXD2A | ENST00000369774.4 | SH3 and PX domains 2A                                                            |
| NCOR2    | ENST00000405201.1 | nuclear receptor corepressor 2                                                   |
| ATAD2B   | ENST00000238789.5 | ATPase family, AAA domain containing 2B                                          |
| PAQR5    | ENST00000395407.2 | progesterin and adipoQ receptor family member V                                  |
| FAM179B  | ENST00000382233.2 | family with sequence similarity 179, member B                                    |
| BICD2    | ENST00000356884.6 | bicaudal D homolog 2 (Drosophila)                                                |
| MEX3D    | ENST00000402693.4 | mex-3 RNA binding family member D                                                |
| PCDH19   | ENST00000420881.2 | protocadherin 19                                                                 |
| STXBP6   | ENST00000396700.1 | syntaxin binding protein 6 (amisyn)                                              |
| TBL1XR1  | ENST00000430069.1 | transducin (beta)-like 1 X-linked receptor 1                                     |
| HIPK2    | ENST00000406875.3 | homeodomain interacting protein kinase 2                                         |
| GPR63    | ENST00000229955.3 | G protein-coupled receptor 63                                                    |
| GIGYF1   | ENST00000275732.5 | GRB10 interacting GYF protein 1                                                  |
| PVRL1    | ENST00000264025.3 | poliovirus receptor-related 1 (herpesvirus entry mediator C)                     |
| USH1G    | ENST00000319642.1 | Usher syndrome 1G (autosomal recessive)                                          |
| ABC9     | ENST00000261200.4 | ATP-binding cassette, sub-family C (CFTR/MRP), member 9                          |
| SLC6A17  | ENST00000331565.4 | solute carrier family 6 (neutral amino acid transporter), member 17              |
| AMBRA1   | ENST00000314845.3 | autophagy/beclin-1 regulator 1                                                   |
| PPP2R5C  | ENST00000422945.2 | protein phosphatase 2, regulatory subunit B', gamma                              |
| GREB1L   | ENST00000580732.2 | growth regulation by estrogen in breast cancer-like                              |
| CUL5     | ENST00000393094.2 | cullin 5                                                                         |
| USH2A    | ENST00000307340.3 | Usher syndrome 2A (autosomal recessive, mild)                                    |
| DFFA     | ENST00000377038.3 | DNA fragmentation factor, 45kDa, alpha polypeptide                               |
| IPO8     | ENST00000256079.4 | importin 8                                                                       |
| GOSR2    | ENST00000576910.2 | golgi SNAP receptor complex member 2                                             |
| ZC3H4    | ENST00000253048.5 | zinc finger CCCH-type containing 4                                               |
| EED      | ENST00000327320.4 | embryonic ectoderm development                                                   |
| FAM46C   | ENST00000369448.3 | family with sequence similarity 46, member C                                     |
| ARHGAP26 | ENST00000378004.3 | Rho GTPase activating protein 26                                                 |
| SUZ12    | ENST00000322652.5 | SUZ12 polycomb repressive complex 2 subunit                                      |
| DCUN1D3  | ENST00000324344.4 | DCN1, defective in cullin neddylation 1, domain containing 3                     |
| SIAH1    | ENST00000380006.2 | siah E3 ubiquitin protein ligase 1                                               |
| ONECUT2  | ENST00000491143.2 | one cut homeobox 2                                                               |
| NTPCR    | ENST00000366628.5 | nucleoside-triphosphatase, cancer-related                                        |

|          |                   |                                                                       |
|----------|-------------------|-----------------------------------------------------------------------|
| FRMD5    | ENST00000484674.1 | FERM domain containing 5                                              |
| ACVR2B   | ENST00000352511.4 | activin A receptor, type IIB                                          |
| ELL      | ENST00000262809.4 | elongation factor RNA polymerase II                                   |
| TRIM71   | ENST00000383763.5 | tripartite motif containing 71, E3 ubiquitin protein ligase           |
| ANKRD52  | ENST00000267116.7 | ankyrin repeat domain 52                                              |
| TPCN1    | ENST00000335509.6 | two pore segment channel 1                                            |
| CEP350   | ENST00000367607.3 | centrosomal protein 350kDa                                            |
| PSME4    | ENST00000404125.1 | proteasome (prosome, macropain) activator subunit 4                   |
| PAK3     | ENST00000372007.5 | p21 protein (Cdc42/Rac)-activated kinase 3                            |
| JMY      | ENST00000396137.4 | junction mediating and regulatory protein, p53 cofactor               |
| SYNCRIP  | ENST00000355238.6 | synaptotagmin binding, cytoplasmic RNA interacting protein            |
| SMURF1   | ENST00000361368.2 | SMAD specific E3 ubiquitin protein ligase 1                           |
| UBE2J1   | ENST00000435041.2 | ubiquitin-conjugating enzyme E2, J1                                   |
| SENP5    | ENST00000323460.5 | SUMO1/sentrin specific peptidase 5                                    |
| USP31    | ENST00000219689.7 | ubiquitin specific peptidase 31                                       |
| NUFIP2   | ENST00000225388.4 | nuclear fragile X mental retardation protein interacting protein 2    |
| ADCY9    | ENST00000294016.3 | adenylate cyclase 9                                                   |
| ZNF148   | ENST00000360647.4 | zinc finger protein 148                                               |
| KCTD16   | ENST00000507359.3 | potassium channel tetramerization domain containing 16                |
| MOC51    | ENST00000373186.4 | molybdenum cofactor synthesis 1                                       |
| DYRK2    | ENST00000344096.3 | dual-specificity tyrosine-(Y)-phosphorylation regulated kinase 2      |
| RBBP8    | ENST00000399722.2 | retinoblastoma binding protein 8                                      |
| JAG2     | ENST00000331782.3 | jagged 2                                                              |
| TRPM3    | ENST00000377110.3 | transient receptor potential cation channel, subfamily M, member 3    |
| AVL9     | ENST00000318709.4 | AVL9 homolog (S. cerevisiae)                                          |
| CNNM2    | ENST00000369878.4 | cyclin M2                                                             |
| TMEM136  | ENST00000529187.1 | transmembrane protein 136                                             |
| ST3GAL2  | ENST00000342907.2 | ST3 beta-galactoside alpha-2,3-sialyltransferase 2                    |
| NRP2     | ENST00000360409.3 | neuropilin 2                                                          |
| SCN2A    | ENST00000375437.2 | sodium channel, voltage-gated, type II, alpha subunit                 |
| KDM3B    | ENST00000314358.5 | lysine (K)-specific demethylase 3B                                    |
| KCNQ4    | ENST00000347132.5 | potassium voltage-gated channel, KQT-like subfamily, member 4         |
| SMAD7    | ENST00000262158.2 | SMAD family member 7                                                  |
| SCN5A    | ENST00000414099.2 | sodium channel, voltage-gated, type V, alpha subunit                  |
| TLN1     | ENST00000314888.9 | talin 1                                                               |
| IL6ST    | ENST00000381287.4 | interleukin 6 signal transducer (gp130, oncostatin M receptor)        |
| PHF12    | ENST00000577226.1 | PHD finger protein 12                                                 |
| IQSEC2   | ENST00000375365.2 | IQ motif and Sec7 domain 2                                            |
| DCAF7    | ENST00000310827.4 | DDB1 and CUL4 associated factor 7                                     |
| SOC56    | ENST00000397942.3 | suppressor of cytokine signaling 6                                    |
| CHD9     | ENST00000566029.1 | chromodomain helicase DNA binding protein 9                           |
| ERC1     | ENST00000355446.5 | ELKS/RAB6-interacting/CAST family member 1                            |
| SLC6A6   | ENST00000454876.2 | solute carrier family 6 (neurotransmitter transporter), member 6      |
| PROX1    | ENST00000366958.4 | prospero homeobox 1                                                   |
| TUBB     | ENST00000327892.8 | tubulin, beta class I                                                 |
| UBXN7    | ENST00000296328.4 | UBX domain protein 7                                                  |
| USP47    | ENST00000339865.5 | ubiquitin specific peptidase 47                                       |
| SP1      | ENST00000426431.2 | Sp1 transcription factor                                              |
| DDX3X    | ENST00000399959.2 | DEAD (Asp-Glu-Ala-Asp) box helicase 3, X-linked                       |
| GAD2     | ENST00000376261.3 | glutamate decarboxylase 2 (pancreatic islets and brain, 65kDa)        |
| RPRD1A   | ENST00000399022.4 | regulation of nuclear pre-mRNA domain containing 1A                   |
| SWAP70   | ENST00000318950.6 | SWAP switching B-cell complex 70kDa subunit                           |
| IRS1     | ENST00000305123.5 | insulin receptor substrate 1                                          |
| FBXW2    | ENST00000608872.1 | F-box and WD repeat domain containing 2                               |
| MAP4K4   | ENST00000413150.2 | mitogen-activated protein kinase kinase kinase kinase 4               |
| USP46    | ENST00000441222.3 | ubiquitin specific peptidase 46                                       |
| C4orf32  | ENST00000309733.5 | chromosome 4 open reading frame 32                                    |
| POU6F1   | ENST00000389243.4 | POU class 6 homeobox 1                                                |
| COL9A3   | ENST00000343916.3 | collagen, type IX, alpha 3                                            |
| LPIN2    | ENST00000261596.4 | lipin 2                                                               |
| GATAD2B  | ENST00000368655.4 | GATA zinc finger domain containing 2B                                 |
| LYPLA2   | ENST00000374505.2 | lysophospholipase II                                                  |
| MYPN     | ENST00000358913.5 | myopalladin                                                           |
| CDK19    | ENST00000368911.3 | cyclin-dependent kinase 19                                            |
| CLF2     | ENST00000379261.4 | CUGBP, Elav-like family member 2                                      |
| TJP1     | ENST00000346128.6 | tight junction protein 1                                              |
| SUV420H1 | ENST00000304363.4 | suppressor of variegation 4-20 homolog 1 (Drosophila)                 |
| HDAC4    | ENST00000345617.3 | histone deacetylase 4                                                 |
| AFF1     | ENST00000395146.4 | AF4/FMR2 family, member 1                                             |
| KMT2C    | ENST00000262189.6 | lysine (K)-specific methyltransferase 2C                              |
| SLC16A10 | ENST00000368850.3 | solute carrier family 16 (aromatic amino acid transporter), member 10 |
| MED6     | ENST00000440435.2 | mediator complex subunit 6                                            |
| SETD7    | ENST00000274031.3 | SET domain containing (lysine methyltransferase) 7                    |
| FOXP1    | ENST00000318789.4 | forkhead box P1                                                       |
| RFXOX2   | ENST00000449924.2 | RNA binding protein, fox-1 homolog (C. elegans) 2                     |
| TIGD2    | ENST00000317005.2 | tigger transposable element derived 2                                 |
| SESN3    | ENST00000536441.1 | sestrin 3                                                             |
| CASKIN1  | ENST00000343516.6 | CASK interacting protein 1                                            |
| ZFH4     | ENST00000521891.2 | zinc finger homeobox 4                                                |
| MBNL1    | ENST00000357472.3 | muscleblind-like splicing regulator 1                                 |
| KCNK12   | ENST00000327876.4 | potassium channel, subfamily K, member 12                             |
| PTDSS1   | ENST00000517309.1 | phosphatidylserine synthase 1                                         |
| CAMK2D   | ENST00000296402.5 | calcium/calmodulin-dependent protein kinase II delta                  |
| FAM126A  | ENST00000409923.1 | family with sequence similarity 126, member A                         |
| PAPLN    | ENST00000381166.3 | papilin, proteoglycan-like sulfated glycoprotein                      |
| SAMD8    | ENST00000372687.4 | sterile alpha motif domain containing 8                               |
| SIN3A    | ENST00000394947.3 | SIN3 transcription regulator family member A                          |
| BBX      | ENST00000415149.2 | bobby sox homolog (Drosophila)                                        |
| MXI1     | ENST00000332674.5 | MAX interactor 1, dimerization protein                                |
| GM2A     | ENST00000357164.3 | GM2 ganglioside activator                                             |
| DENND5A  | ENST00000530044.1 | DENN/MADD domain containing 5A                                        |
| NFIC     | ENST00000346156.5 | nuclear factor I/C (CCAAT-binding transcription factor)               |
| TMPPE    | ENST00000416695.2 | transmembrane protein with metallophosphoesterase domain              |
| CBX8     | ENST00000269385.4 | chromobox homolog 8                                                   |
| SOX6     | ENST00000316399.6 | SRY (sex determining region Y)-box 6                                  |
| HECW2    | ENST00000260983.3 | HECT, C2 and WW domain containing E3 ubiquitin protein ligase 2       |
| ROBO2    | ENST00000461745.1 | roundabout, axon guidance receptor, homolog 2 (Drosophila)            |
| COP52    | ENST00000388901.5 | COP9 signalosome subunit 2                                            |

|          |                   |                                                                                                        |
|----------|-------------------|--------------------------------------------------------------------------------------------------------|
| TRPV3    | ENST00000301365.4 | transient receptor potential cation channel, subfamily V, member 3                                     |
| PISD     | ENST00000397500.1 | phosphatidylserine decarboxylase                                                                       |
| TBCEL    | ENST00000422003.2 | tubulin folding cofactor E-like                                                                        |
| PAQR3    | ENST00000512733.1 | progesterin and adipoQ receptor family member III                                                      |
| PRKCA    | ENST00000413366.3 | protein kinase C, alpha                                                                                |
| DNAJC18  | ENST00000302060.5 | DnaJ (Hsp40) homolog, subfamily C, member 18                                                           |
| CDK16    | ENST00000457458.2 | cyclin-dependent kinase 16                                                                             |
| PHB2     | ENST00000546111.1 | prohibitin 2                                                                                           |
| C2orf68  | ENST00000306336.5 | chromosome 2 open reading frame 68                                                                     |
| KCMF1    | ENST00000409785.4 | potassium channel modulatory factor 1                                                                  |
| FGF12    | ENST00000445105.2 | fibroblast growth factor 12                                                                            |
| SHROOM2  | ENST00000380913.3 | shroom family member 2                                                                                 |
| CREB1    | ENST00000432329.2 | cAMP responsive element binding protein 1                                                              |
| HIC2     | ENST00000407464.2 | hypermethylated in cancer 2                                                                            |
| YWHAB    | ENST00000353703.4 | tyrosine 3-monooxygenase/tryptophan 5-monooxygenase activation protein, beta polypeptide               |
| SAR1B    | ENST00000402673.2 | SAR1 homolog B ( <i>S. cerevisiae</i> )                                                                |
| ARL3     | ENST00000260746.5 | ADP-ribosylation factor-like 3                                                                         |
| MLLT3    | ENST00000380338.4 | myeloid/lymphoid or mixed-lineage leukemia (trithorax homolog, <i>Drosophila</i> ); translocated to, 3 |
| SPRYD4   | ENST00000338146.5 | SPRY domain containing 4                                                                               |
| EIF4E    | ENST00000450253.2 | eukaryotic translation initiation factor 4E                                                            |
| SLC31A1  | ENST00000374212.4 | solute carrier family 31 (copper transporter), member 1                                                |
| ATP6V0A2 | ENST00000330342.3 | ATPase, H+ transporting, lysosomal V0 subunit a2                                                       |
| NIPBL    | ENST00000448238.2 | Nipped-B homolog ( <i>Drosophila</i> )                                                                 |
| PLEKHA6  | ENST00000272203.3 | pleckstrin homology domain containing, family A member 6                                               |
| GRK5     | ENST00000392870.2 | G protein-coupled receptor kinase 5                                                                    |
| DMD      | ENST00000378677.2 | dystrophin                                                                                             |
| MRPS25   | ENST00000253686.2 | mitochondrial ribosomal protein S25                                                                    |
| SEC31B   | ENST00000370345.3 | SEC31 homolog B ( <i>S. cerevisiae</i> )                                                               |
| GLG1     | ENST00000422840.2 | golgi glycoprotein 1                                                                                   |
| LMO4     | ENST00000370544.5 | LIM domain only 4                                                                                      |
| SLC35E2  | ENST00000246421.4 | solute carrier family 35, member E2                                                                    |
| ZBTB20   | ENST00000462705.1 | zinc finger and BTB domain containing 20                                                               |
| PTCHD3   | ENST00000438700.3 | patched domain containing 3                                                                            |
| FGF10    | ENST00000264664.4 | fibroblast growth factor 10                                                                            |
| PRMT7    | ENST00000339507.5 | protein arginine methyltransferase 7                                                                   |
| MEF2D    | ENST00000464356.2 | myocyte enhancer factor 2D                                                                             |
| GRIN2A   | ENST00000562109.1 | glutamate receptor, ionotropic, N-methyl D-aspartate 2A                                                |
| CADM1    | ENST00000452722.3 | cell adhesion molecule 1                                                                               |
| JAKMIP2  | ENST00000507386.1 | janus kinase and microtubule interacting protein 2                                                     |
| SERPINC1 | ENST00000367698.3 | serpin peptidase inhibitor, clade C (antithrombin), member 1                                           |

Supplementary Table 5: TOP 100 probesets deregulated in T-PLL (CD4+CD8-) compared to normal CD4M cells

| CD4N1    | CD4N2    | CD4M1    | CD4M2    | CD4E1    | CD4E2     | CD8N1    | CD8N2_b  | CD8M1    | CD8M2    | CD8E1    | CD8E2    | average T-PLL | average CD4M | FC           | Probe set     | RefSeq         | gene name    |
|----------|----------|----------|----------|----------|-----------|----------|----------|----------|----------|----------|----------|---------------|--------------|--------------|---------------|----------------|--------------|
| 30,91131 | 22,38571 | 24,45115 | 28,25191 | 26,587   | 21,13323  | 29,39781 | 21,39451 | 24,51685 | 24,26424 | 26,10351 | 21,62807 | 2624,037815   | 26,351531    | 99,57819     | 39318_t       | gb:A1334358    | TCL1A        |
| 16,68861 | 18,38645 | 12,62386 | 19,00782 | 12,63261 | 32,96714  | 15,56804 | 14,30533 | 25,0961  | 16,83431 | 17,46738 | 18,42679 | 15,27,709517  | 15,9158365   | 95,6726      | 202859_x_at   | gb:NM_000767.2 | CYP2B6       |
| 52,57241 | 51,53382 | 46,81095 | 45,80618 | 56,75812 | 43,09021  | 51,49396 | 41,13245 | 50,56726 | 39,76082 | 39,88438 | 37,68471 | 2898,286828   | 46,308561    | 62,58642     | 209995_s_at   | gb:NM_017581.1 | CHRNA9       |
| 70,3097  | 64,37862 | 51,73867 | 45,37522 | 70,61042 | 44,86247  | 71,87155 | 49,8856  | 37,22644 | 41,93106 | 51,19708 | 47,12397 | 48,5569435    | 51,17282     | 2146777_x_at | gb:AL162069.1 | IGLL5          |              |
| 39,93061 | 75,712   | 41,93635 | 106,4082 | 65,09345 | 136,2017  | 37,79561 | 59,64452 | 36,16418 | 63,72835 | 23,18081 | 71,733   | 3129,658282   | 74,1722795   | 42,19445     | 202917_s_at   | gb:NM_003837.1 | FBP2         |
| 154,2951 | 226,6181 | 37,89294 | 46,14465 | 37,12087 | 28,6968   | 199,1179 | 54,84018 | 31,53011 | 16,32489 | 26,07312 | 21,95201 | 1524,106883   | 42,018798    | 36,27202     | 209841_s_at   | gb:NM_014128.1 | PROO470      |
| 11,51    | 12,29724 | 9,398453 | 9,113259 | 11,94158 | 10,55464  | 11,43235 | 11,76217 | 10,53027 | 13,6649  | 15,0331  | 13,61679 | 319,3453038   | 9,255901     | 34,50181     | 201669_s_at   | gb:NM_015492.1 | DKFZP434H132 |
| 443,7699 | 555,8794 | 49,46373 | 94,49685 | 61,42738 | 20,36373  | 394,2994 | 193,5054 | 51,05252 | 29,27296 | 22,54889 | 21,1645  | 2359,545753   | 71,980287    | 32,78044     | 209840_s_at   | gb:NM_014127.1 | PROO456      |
| 30,96957 | 41,21702 | 25,90897 | 29,31953 | 32,8572  | 2890,012  | 2637,196 | 3496,138 | 2046,566 | 2686,546 | 2330,967 | 5219,457 | 828,0615241   | 27,614252    | 29,98674     | 205821_at     | gb:AI630178    | DKFZP762A227 |
| 191,2763 | 127,2008 | 108,6875 | 102,5147 | 154,245  | 110,8911  | 187,1347 | 199,5073 | 115,1286 | 103,9136 | 126,6919 | 109,2308 | 2861,968418   | 105,6010585  | 27,1017      | 224795_x_at   | gb:AF277624.1  | KR19         |
| 27,92947 | 44,31706 | 31,55153 | 30,57725 | 53,3589  | 72,17022  | 33,76594 | 36,93938 | 37,30294 | 54,65273 | 15,12598 | 35,37293 | 817,9693154   | 31,0643905   | 26,33141     | 1555745_a_at  | gb:BF516567    | SNRPB        |
| 50,90386 | 87,34771 | 62,87828 | 121,3473 | 289,0716 | 129,9914  | 36,32883 | 60,96088 | 94,99872 | 88,03249 | 110,3603 | 80,41213 | 2291,637728   | 92,112803    | 24,8786      | 214414_x_at   | gb:BE467208    | HBA2         |
| 31,85596 | 98,81769 | 31,16086 | 132,33   | 121,4778 | 184,2274  | 21,95688 | 57,0351  | 45,78163 | 85,87414 | 25,69056 | 69,84079 | 1794,755816   | 81,74542     | 21,95543     | 213975_s_at   | gb:BF590192    | KIAA0610     |
| 54,71316 | 91,24636 | 65,89928 | 134,8927 | 74,04084 | 111,0625  | 53,91452 | 56,89401 | 75,57887 | 74,70022 | 62,96416 | 67,03656 | 2168,837683   | 100,194467   | 21,64628     | 209116_x_at   | gb:NM_020487.1 | FLJ13860     |
| 22,69716 | 21,45823 | 20,40114 | 18,41817 | 20,50083 | 17,39638  | 17,7589  | 22,01797 | 18,53734 | 18,20293 | 24,86294 | 23,48973 | 385,4583845   | 19,556578    | 19,70991     | 218559_s_at   | gb:AI913600    | MAFB         |
| 140,8065 | 95,00523 | 71,21378 | 81,13664 | 99,00681 | 94,67741  | 123,3307 | 141,4096 | 66,52746 | 67,11533 | 78,27698 | 70,68529 | 1447,430677   | 76,175208    | 19,00134     | 221671_x_at   | gb:AI703265    | IGKC         |
| 149,5015 | 107,4725 | 86,855   | 75,4332  | 133,6445 | 82,35663  | 135,1597 | 147,7327 | 94,40863 | 74,66777 | 94,27878 | 75,40155 | 1497,774483   | 81,1441      | 18,45821     | 221651_s_at   | gb:BF466199    | IGKC         |
| 98,91944 | 160,9742 | 21,9786  | 23,13089 | 18,39984 | 15,66408  | 128,3115 | 61,28003 | 17,54276 | 19,29659 | 13,03987 | 15,08622 | 414,0097486   | 22,554747    | 18,35577     | 207324_s_at   | gb:AL157418.1  | MINK         |
| 8,771764 | 9,164106 | 8,831262 | 8,74272  | 10,92471 | 13,97319  | 8,58029  | 10,38239 | 10,2768  | 10,88318 | 10,77382 | 8,156223 | 153,0078747   | 8,786991     | 17,413       | 1555756_a_at  | gb:AI743207    | BGR          |
| 24,6842  | 38,10423 | 22,40839 | 22,40729 | 52,35414 | 48,59613  | 18,54105 | 25,19475 | 21,73321 | 27,73243 | 24,54624 | 23,88788 | 384,9225094   | 22,50561     | 17,1034      | 221731_s_at   | gb:AI688554    | VCAN         |
| 18,24938 | 17,04082 | 13,43671 | 20,89135 | 25,22719 | 20,10402  | 18,8651  | 19,25588 | 21,11085 | 21,85311 | 18,92515 | 17,51557 | 282,404128    | 17,1640305   | 16,45325     | 204959_x_at   | gb:AF077973.1  | CLN3         |
| 70,76627 | 56,81661 | 58,02531 | 102,2285 | 58,50958 | 111,72535 | 46,41267 | 73,18951 | 51,62722 | 44,081   | 49,95848 | 92,67115 | 1265,184835   | 80,1269125   | 15,78976     | 203535_at     | gb:NM_023107.1 | FGFR1        |
| 26,28331 | 35,19158 | 17,82985 | 30,32819 | 39,93627 | 41,03096  | 30,98329 | 32,02437 | 21,7506  | 41,4386  | 24,04756 | 22,63228 | 366,0528744   | 24,0790195   | 15,20215     | 221841_s_at   | gb:AI191905    | KLF4         |
| 13,3564  | 11,90697 | 8,562824 | 11,1607  | 12,47036 | 10,38419  | 12,4155  | 14,64875 | 11,52075 | 10,71915 | 9,91757  | 9,606857 | 149,4887566   | 9,861762     | 15,15842     | 212592_at     | gb:AI631001    | NKAP95       |
| 127,2144 | 194,9495 | 122,183  | 269,4938 | 160,6178 | 232,0614  | 108,9269 | 57,5595  | 134,9048 | 126,0233 | 137,5668 | 119,4175 | 2901,813114   | 195,838397   | 14,81739     | 211696_x_at   | gb:BC132226.1  | HBB          |
| 78,86305 | 92,91051 | 71,48188 | 109,1963 | 126,0325 | 100,5779  | 56,28823 | 55,22797 | 75,32059 | 58,24695 | 81,44022 | 72,49338 | 1330,790349   | 90,3397015   | 14,73106     | 211745_x_at   | gb:AF006276.1  | HBA2         |
| 13,51631 | 29,13141 | 16,85619 | 18,7922  | 26,60751 | 23,23418  | 17,90161 | 50,83914 | 26,86665 | 29,00074 | 37,84005 | 58,86632 | 242,7301112   | 17,8241935   | 13,61801     | 201218_x_at   | gb:AK022075.1  | RNF8         |
| 377,9242 | 222,9471 | 39,8282  | 42,50436 | 47,01003 | 35,83153  | 585,0116 | 305,0385 | 385,5059 | 206,0934 | 214,7245 | 146,272  | 517,4897504   | 40,893276    | 12,65464     | 208982_at     | gb:NM_020422.2 | hklp2        |
| 50,49117 | 67,72415 | 34,87378 | 43,17903 | 74,61239 | 67,1766   | 60,70454 | 151,8577 | 68,12507 | 81,92634 | 113,8767 | 204,3422 | 485,2702227   | 39,026406    | 12,43441     | 210835_s_at   | gb:AA121529    | MLL3         |
| 98,5578  | 121,4835 | 97,12073 | 156,456  | 99,31668 | 136,2749  | 77,55196 | 84,83113 | 97,87708 | 79,28394 | 90,9583  | 92,35842 | 1567,509188   | 126,7883835  | 12,36319     | 217232_at     | gb:AA470049    | HBB          |
| 35,25371 | 33,40463 | 25,47077 | 30,02085 | 70,23054 | 63,56603  | 135,1597 | 147,7327 | 94,40863 | 74,66777 | 94,27878 | 75,40155 | 339,5964673   | 27,745806    | 12,23956     | 204620_s_at   | gb:AA500673.1  | SP100        |
| 64,13087 | 69,85218 | 67,48808 | 96,30908 | 77,57339 | 87,87272  | 58,48546 | 43,16246 | 60,65986 | 50,96779 | 71,25554 | 56,51196 | 939,6391665   | 81,8985765   | 12,13256     | 211699_x_at   | gb:AF139957.1  | FKBG2        |
| 13,4066  | 86,69431 | 61,61725 | 96,54402 | 101,8373 | 104,4504  | 54,06149 | 57,54806 | 75,8321  | 57,55815 | 68,19962 | 61,51938 | 951,2890461   | 79,0806345   | 12,02936     | 217414_x_at   | gb:AI681105    | HBA2         |
| 39,41629 | 29,64152 | 27,25333 | 32,1049  | 52,07789 | 52,06595  | 27,33278 | 24,99089 | 25,91539 | 33,12989 | 26,45632 | 32,36649 | 356,7456924   | 29,679114    | 12,02009     | 205237_at     | gb:AF167107.1  | VCKB         |
| 60,06541 | 96,70088 | 76,77192 | 118,9407 | 113,0171 | 101,1726  | 58,931   | 54,38176 | 71,3039  | 93,54756 | 90,38577 | 75,3539  | 1173,761606   | 97,85629     | 11,99475     | 209458_x_at   | gb:NM_022133.1 | NPAS3        |
| 11,66791 | 11,89962 | 12,8902  | 10,01661 | 14,80316 | 14,98689  | 12,42863 | 13,09297 | 13,59436 | 15,91734 | 14,55758 | 14,51543 | 145,1379636   | 12,4534025   | 11,65448     | 201670_x_at   | gb:NM_011116.1 | ADCY9        |
| 15,75039 | 18,11213 | 28,32328 | 29,3554  | 27,79558 | 22,30845  | 12,52214 | 15,01392 | 18,99006 | 26,79495 | 14,84033 | 16,3897  | 288,1366632   | 26,138412    | 11,0235      | 234994_at     | gb:NM_018287.1 | FLJ10971     |
| 26,49554 | 36,05251 | 55,71674 | 58,22083 | 49,66884 | 24,62142  | 22,38601 | 41,05881 | 34,17301 | 40,90057 | 25,75755 | 19,66445 | 626,7417616   | 56,9687855   | 11,00149     | 229797_at     | gb:AI011597.1  | MCOLN3       |
| 20,16831 | 19,16912 | 384,8726 | 247,3608 | 325,4038 | 23,90871  | 17,89108 | 22,47751 | 178,7509 | 17,12669 | 186,9938 | 21,27279 | 301,2165921   | 316,11673    | 10,095574    | 206983_at     | gb:AF035291.1  | CCRG6        |
| 35,7592  | 30,02159 | 26,73274 | 30,02515 | 30,58613 | 53,35613  | 28,81659 | 31,96548 | 24,97934 | 36,67761 | 25,42502 | 30,57876 | 294,2812777   | 28,3789455   | 10,36974     | 205863_at     | gb:BE504197    | S100A12      |
| 27,52401 | 34,04814 | 36,10256 | 32,07551 | 54,67818 | 70,75414  | 50,14526 | 415,2261 | 271,5366 | 69,23397 | 135,398  | 439,952  | 349,4071276   | 34,089031    | 10,24984     | 204122_at     | gb:AV752215    | SRI          |
| 69,7576  | 116,1724 | 39,80191 | 70,63216 | 113,7006 | 91,8935   | 75,41618 | 233,4867 | 103,198  | 133,8941 | 145,0845 | 208,6721 | 544,076799    | 55,217037    | 9,853423     | 210220_x_at   | gb:NM_004860.2 | FXR2         |
| 279,3755 | 220,3529 | 197,3627 | 69,31027 | 251,3072 | 289,7171  | 2031,266 | 1702,515 | 1770,446 | 1722,219 | 1225,747 | 977,9708 | 1271,947192   | 133,336499   | 9,539377     | 201160_x_at   | gb:NM_000491.2 | C1QB         |
| 16,02118 | 16,77881 | 19,47827 | 23,15899 | 36,76951 | 71,66593  | 19,96306 | 17,32687 | 11,69751 | 38,94918 | 22,38404 | 31,11697 | 202,0087465   | 21,318633    | 9,475689     | 201560_at     | gb:HA40895     | NCIB         |
| 24,38237 | 50,63774 | 15,1783  | 27,56042 | 32,69292 | 19,64     | 24,76853 | 40,73388 | 25,72815 | 25,38219 | 19,02375 | 18,19493 | 182,1934711   | 21,3693585   | 8,525921     | 242136_x_at   | gb:AE566528    | NEFL         |
| 16,78634 | 11,77245 | 14,10486 | 12,2377  | 16,39945 | 14,32352  | 12,69293 | 14,95343 | 14,28403 | 17,4103  | 13,69793 | 15,11405 | 110,4717224   | 13,17128     | 8,387319     | 226818_x_at   | gb:TS5680      | MPG1         |
| 23,0808  | 21,06223 | 24,70707 | 16,40325 | 20,31201 | 19,0358   | 18,13622 | 20,83244 | 15,86648 | 16,65974 | 21,01474 | 22,36589 | 171,3816196   | 20,555155    | 8,337647     | 201743_at     | gb:BF343007    | TFAP2A       |
| 19,92203 | 19,2027  | 16,38246 | 15,93624 | 18,2735  | 20,47141  | 18,66951 | 17,132   | 15,41532 | 14,51062 | 12,66846 | 18,37303 | 132,0602634   | 16,159347    | 8,172376     | 208146_s_at   | gb:AC024945.1  | CPVL         |
| 34,3311  | 26,25833 | 27,31184 | 27,92667 | 32,10825 | 40,15053  | 24,96952 | 29,14085 | 28,39009 | 27,78846 | 28,47066 | 26,40629 | 223,4446485   | 27,6192545   | 8,090177     | 218454_at     | gb:WA4508      | PLBD1        |
| 44,13685 | 52,19696 | 24,79215 | 32,85607 | 26,95957 | 22,30709  | 62,82934 | 34,34013 | 26,1082  | 21,69913 | 22,67308 | 21,33099 | 233,1780232   | 28,824113    | 8,089686     | 205544_s_at   | gb:NM_010845.1 | COL4A1       |
| 91,9509  | 103,9926 | 58,74636 | 74,87888 | 50,40164 | 194,5342  | 109,4614 | 146,9341 | 78,64206 | 124,7345 | 121,0806 | 273,5178 | 540,274295</  |              |              |               |                |              |

Supplementary Table 6: Fold Change all T-PLL compared to the average miRNA expression in CD4E control samples (normalized counts)

|                 | logFC    | logCPM   | LR       | PValue   | FDR      |
|-----------------|----------|----------|----------|----------|----------|
| hsa-miR-141-3p  | 6,443465 | 13,65764 | 16,05753 | 6,14E-05 | 0,011436 |
| hsa-miR-200c-3p | 5,820736 | 12,94985 | 18,03096 | 2,17E-05 | 0,011436 |
| hsa-miR-181a-5p | 5,222023 | 16,57649 | 10,97928 | 0,000921 | 0,025436 |
| hsa-miR-181b-5p | 4,406398 | 14,01337 | 10,99606 | 0,000913 | 0,025436 |
| hsa-miR-3168    | 4,295416 | 11,33799 | 10,47232 | 0,001212 | 0,030216 |
| hsa-miR-30d-5p  | 3,493705 | 13,60408 | 10,84707 | 0,00099  | 0,026376 |
| hsa-miR-363-3p  | 3,468302 | 10,64196 | 15,33879 | 8,99E-05 | 0,011576 |
| hsa-miR-29a-3p  | 3,449486 | 12,34509 | 11,32232 | 0,000766 | 0,025436 |
| hsa-miR-92a-3p  | 3,389087 | 16,77756 | 11,33769 | 0,000759 | 0,025436 |
| hsa-miR-378a-3p | 3,221838 | 11,11407 | 16,74372 | 4,28E-05 | 0,011436 |
| hsa-miR-148a-3p | 3,162401 | 11,31997 | 11,46648 | 0,000709 | 0,025436 |
| hsa-miR-31-5p   | 3,160657 | 11,40516 | 10,51893 | 0,001182 | 0,030216 |
| hsa-miR-143-3p  | 3,147093 | 10,44461 | 9,353562 | 0,002226 | 0,045272 |
| hsa-miR-151a-3p | 3,122831 | 10,98359 | 13,06856 | 0,0003   | 0,024262 |
| hsa-miR-19b-3p  | 3,101128 | 10,98198 | 13,85355 | 0,000198 | 0,020777 |
| hsa-miR-93-5p   | 3,071375 | 11,96692 | 11,68852 | 0,000629 | 0,025436 |
| hsa-miR-128-3p  | 3,04193  | 10,65322 | 15,82305 | 6,96E-05 | 0,011436 |
| hsa-miR-186-5p  | 3,02598  | 11,59933 | 11,86425 | 0,000572 | 0,025436 |
| hsa-miR-17-5p   | 2,639962 | 10,14347 | 15,70641 | 7,4E-05  | 0,011436 |
| hsa-miR-4485    | 2,574388 | 9,815609 | 9,57436  | 0,001973 | 0,042368 |
| hsa-miR-27b-3p  | 2,490584 | 10,34595 | 11,10173 | 0,000862 | 0,025436 |
| hsa-miR-30c-5p  | 2,413063 | 11,50974 | 10,21818 | 0,001391 | 0,033264 |
| hsa-miR-20a-5p  | 2,362222 | 10,07258 | 12,42387 | 0,000424 | 0,025436 |
| hsa-miR-361-3p  | 2,35388  | 10,39195 | 12,98574 | 0,000314 | 0,024262 |
| hsa-miR-3184-5p | 2,335314 | 11,18032 | 12,15175 | 0,00049  | 0,025436 |
| hsa-miR-423-3p  | 2,335314 | 11,18032 | 12,15175 | 0,00049  | 0,025436 |
| hsa-miR-148b-3p | 2,290246 | 10,11909 | 11,6215  | 0,000652 | 0,025436 |
| hsa-miR-29c-3p  | 2,124595 | 9,834083 | 10,17957 | 0,00142  | 0,033264 |
| hsa-miR-106b-3p | 2,120923 | 10,68941 | 9,014572 | 0,002678 | 0,049294 |
| hsa-miR-20b-5p  | 2,041628 | 9,437148 | 11,23339 | 0,000803 | 0,025436 |
| hsa-miR-125a-5p | 1,99309  | 10,06517 | 9,706759 | 0,001836 | 0,04174  |
| hsa-miR-454-3p  | 1,789646 | 9,425445 | 12,18849 | 0,000481 | 0,025436 |
| hsa-miR-151a-5p | 1,738834 | 9,295632 | 13,69503 | 0,000215 | 0,020777 |
| hsa-miR-532-5p  | 1,728213 | 9,59303  | 9,586227 | 0,00196  | 0,042368 |
| hsa-miR-16-2-3p | 1,686172 | 9,428509 | 11,04213 | 0,000891 | 0,025436 |
